# Supplementary material
Source: PubMed Central journal article supplement (PMC3459425)
Supplement: Supp_Fig2.pdf [file Supp_Fig2.pdf]

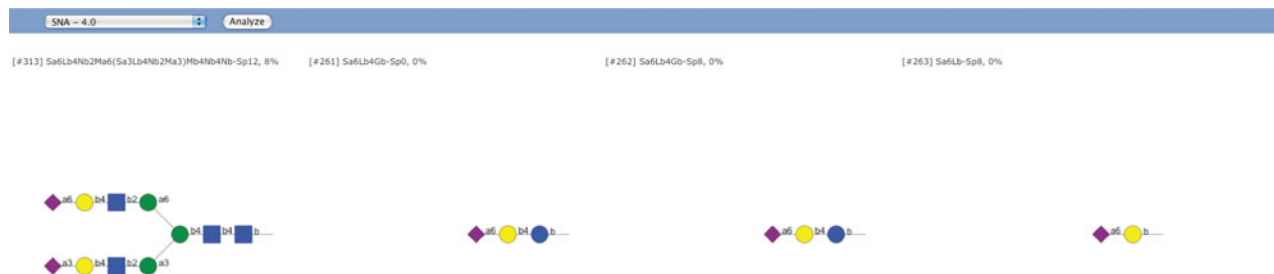

**SUPPLEMENTARY FIG. S2.** Graphical user interface generated by the algorithm in GLYMMR to display the four non-binders of glycan Neu5Ac $\alpha$ 2-6Gal (Sa6L; i.e., the four structures on the array that possess the designated determinant but are not bound by SNA). The designation SNA-4.0 shows what data are displayed from v4.0 of the array. "Analyze" is a command field. The glycan number from the array, the single-letter code for the glycan structure (Supplementary Figure S1) with its linker (Supplementary Tables S1–S6; see online supplementary material at <http://www.liebertpub.com>), and the ranking as a percentile value, is displayed for each glycan.
