# Supplementary material
Source: PubMed Central journal article supplement (PMC3459425)

---

**SUPPLEMENTARY FIG. S8.** Graphical user interface generated by the algorithm in GLYMMR with parameters set to  $m=3$  or 9, and normal sorting according to Figure 2, for the motifs of galectin-8 using two concentrations of galectin-8 (5.0 and 50  $\mu\text{g}/\text{mL}$ ) on version 4.2 of the array. (A) Results with  $m=3$  and not filtered to remove the subsets of identical structures. The designation galectin 8 2\_50\_5 conc. - 4.2 is generated using the dropdown menu to select what data to display from v4.2 of the array. "View Motifs" is a command field. Checking the box labeled "Filter sub-structures" filters the results. (B) Results with  $m=9$  and not filtered to remove the subsets of identical structures. The  $m$  value [#Non-Binders ( $m$ )] can be 3–14, selected from the dropdown menu. The sorting method can also be modified, but is not demonstrated here. A single-letter code for the glycan structures is presented (S, Neu5Ac; L, Gal; N, GlcNAc; A, GalNAc; M, Man; F, Fuc; G, Glc). The numbers are the linkage position on the monosaccharide to the right of the number, and  $a=\alpha$  and  $b=\beta$ . Below the single-letter designation of each oligosaccharide, the underlined numbers indicate the number of binding glycans on the array that possess the displayed motif (binders), and the number of non-binding glycans (non-binders) on the array that possess the displayed motif (binders).

**A**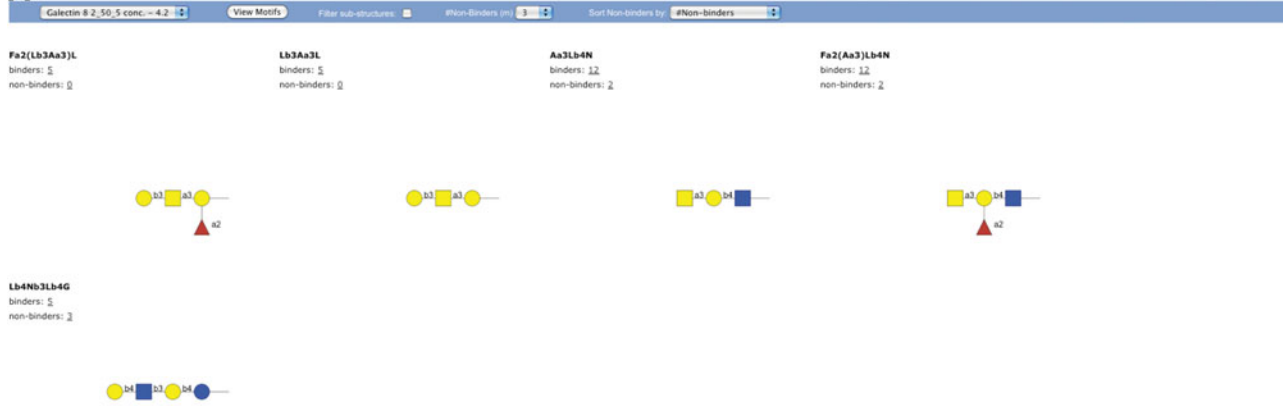**B**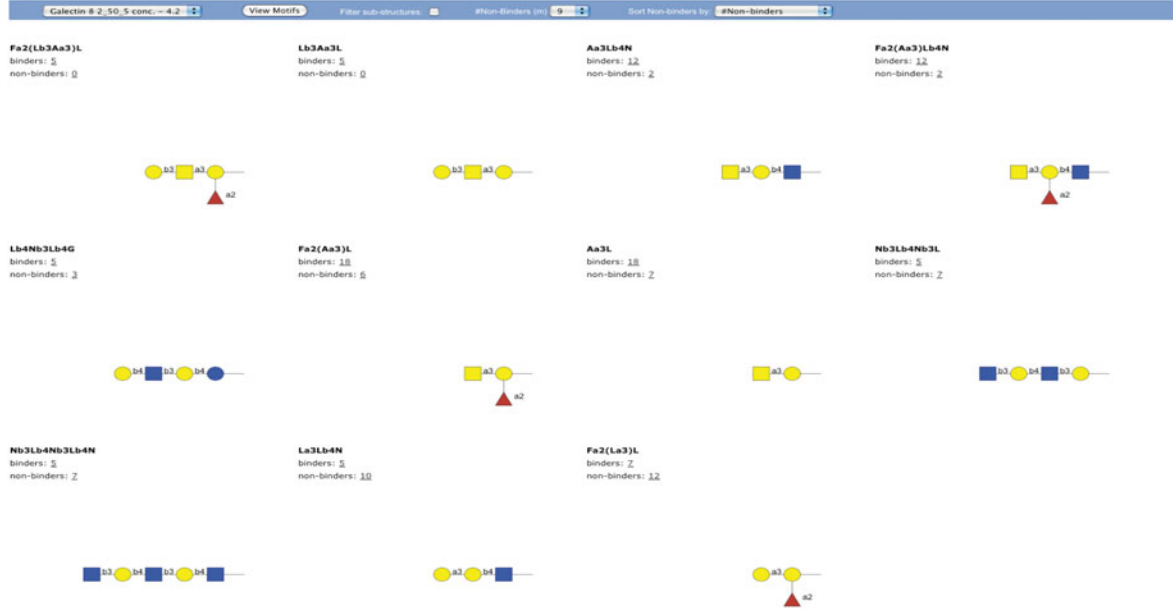**C**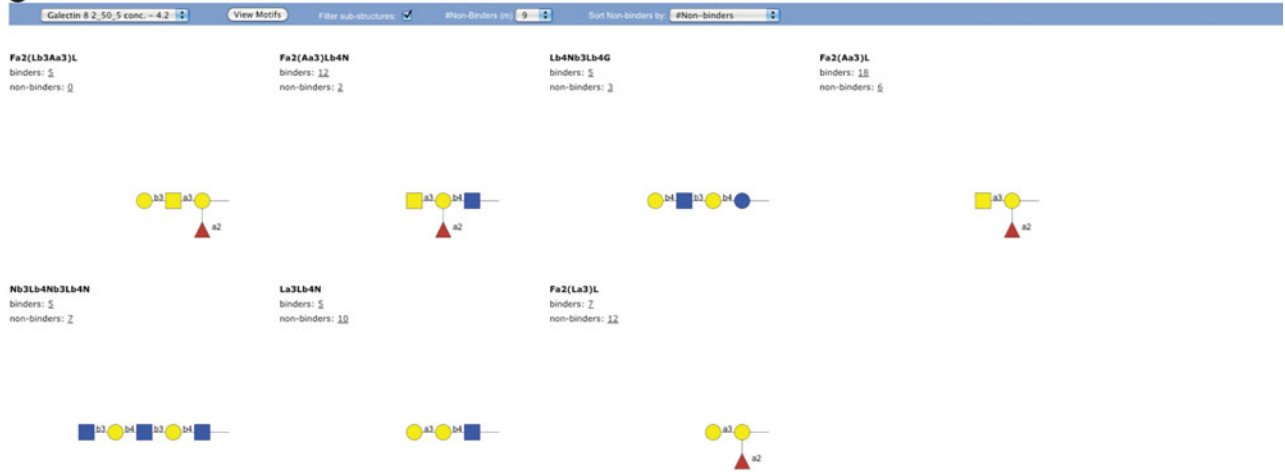

Supplement: Supp_Fig8.pdf [file Supp_Fig8.pdf]
