# Supplementary material
Source: PubMed Central journal article supplement (PMC3459425)
Supplement: Supp_Table2.pdf [file Supp_Table2.pdf]

Supplementary Table 2 Biotinylated HPA at 1.0, 0.1, and 0.05 µg/ml binding to v4.0 of the CFG glycan array detected with Alexa488-labeled Streptavidin and sorted according to Rank based on percent of maximum RFU.

anomeric configuration of monosaccharides indicated as a=α and b=β, highlighted structures defined as binding glycans by z-score with p-values <0.15

| Chart Number | Structure                                                                                                             | Maximum RFU |      | HPA 1.0 µg/ml |      | HPA 0.1 µg/ml |      | HPA 0.05 µg/ml |    | p-values  |
|--------------|-----------------------------------------------------------------------------------------------------------------------|-------------|------|---------------|------|---------------|------|----------------|----|-----------|
|              |                                                                                                                       | AVG. RFU    | Rank | AVG. RFU      | Rank | AVG. RFU      | Rank | AVG. Rank      |    |           |
| 90           | GalNAca1-4(Fuca1-2)Galb1-4GlcNAcb-Sp8                                                                                 | 50800       | 100  | 9556          | 59   | 4463          | 98   | 85             | 85 | 4.84E-10  |
| 330          | GalNAca1-3(Fuca1-2)Galb1-4GlcNAcb1-3Galb1-4GlcNAcb-Sp0                                                                | 36634       | 72   | 13322         | 82   | 4572          | 100  | 85             | 85 | 1.68E-07  |
| 164          | GlcNAca1-3Galb1-4GlcNAcb-Sp8                                                                                          | 37107       | 73   | 10244         | 63   | 4209          | 92   | 76             | 76 | 7.54E-07  |
| 398          | GalNAca1-3GalNAcb1-3Gala1-4Galb1-4GlcNAcb-Sp0                                                                         | 37567       | 74   | 16240         | 100  | 2188          | 48   | 74             | 74 | 7.75E-08  |
| 88           | GalNAca1-3GalNAcb-Sp8                                                                                                 | 42082       | 83   | 8935          | 55   | 3825          | 84   | 74             | 74 | 1.43E-07  |
| 338          | <b>GlcNAca1-4</b> Galb1-4GlcNAcb1-3Galb1-4GlcNAcb-Sp0                                                                 | 36301       | 71   | 10835         | 67   | 3719          | 81   | 73             | 73 | 1.06E-06  |
| 89           | GalNAca1-3Galb-Sp8                                                                                                    | 30550       | 60   | 13600         | 84   | 1968          | 43   | 62             | 62 | 9.57E-06  |
| 331          | GalNAca1-3(Fuca1-2)Galb1-4GlcNAcb1-3Galb1-4GlcNAcb1-3Galb1-4GlcNAcb-Sp0                                               | 34934       | 69   | 12525         | 77   | 1666          | 36   | 61             | 61 | 2.43E-06  |
| 389          | GalNAca1-3(Fuca1-2)Galb1-3GalNAca1-3(Fuca1-2)Galb1-4GlcNAcb-Sp0                                                       | 39470       | 78   | 9573          | 59   | 2067          | 45   | 61             | 61 | 9.40E-07  |
| 336          | <b>GlcNAca1-4</b> Galb1-4GlcNAcb1-3Galb1-4Glc-Sp0                                                                     | 30442       | 60   | 10706         | 66   | 2496          | 55   | 60             | 60 | 2.77E-05  |
| 333          | <b>GlcNAca1-4</b> Galb1-4GlcNAcb1-3Galb1-4GlcNAcb1-3Galb1-4GlcNAcb-Sp0                                                | 26234       | 52   | 15331         | 94   | 1540          | 34   | 60             | 60 | 3.47E-05  |
| 87           | GalNAca1-3(Fuca1-2)Galb-Sp18                                                                                          | 33984       | 67   | 9386          | 58   | 2236          | 49   | 58             | 58 | 1.20E-05  |
| 79           | GalNAca1-3(Fuca1-2)Galb1-3GlcNAcb-Sp0                                                                                 | 32424       | 64   | 10844         | 67   | 1725          | 38   | 56             | 56 | 1.56E-05  |
| 369          | GalNAca1-3(Fuca1-2)Galb1-3GlcNAcb1-2Mana1-3(GalNAca1-3(Fuca1-2)Galb1-3GlcNAcb1-2Mana1-6)Manb1-4GlcNAcb1-4GlcNAcb-Sp20 | 29066       | 57   | 10228         | 63   | 2005          | 44   | 55             | 55 | 7.22E-05  |
| 84           | GalNAca1-3(Fuca1-2)Galb1-4Glc-Sp0                                                                                     | 33162       | 65   | 9847          | 61   | 1147          | 25   | 50             | 50 | 2.24E-05  |
| 83           | GalNAca1-3(Fuca1-2)Galb1-4GlcNAcb-Sp8                                                                                 | 34678       | 68   | 6200          | 38   | 1581          | 35   | 47             | 47 | 4.52E-05  |
| 86           | GalNAca1-3(Fuca1-2)Galb-Sp8                                                                                           | 26865       | 53   | 9712          | 60   | 1047          | 23   | 45             | 45 | 0.0002918 |
| 366          | GalNAca1-3(Fuca1-2)Galb1-4GlcNAcb1-2Mana1-3(GalNAca1-3(Fuca1-2)Galb1-4GlcNAcb1-2Mana1-6)Manb1-4GlcNAcb1-4GlcNAcb-Sp20 | 34486       | 68   | 5213          | 32   | 857           | 19   | 40             | 40 | 9.67E-05  |
| 4            | GalNAca-Sp8                                                                                                           | 28606       | 56   | 5131          | 32   | 725           | 16   | 35             | 35 | 0.00088   |
| 82           | GalNAca1-3(Fuca1-2)Galb1-4GlcNAcb-Sp0                                                                                 | 30662       | 60   | 4830          | 30   | 606           | 13   | 34             | 34 | 0.0005028 |
| 297          | GalNAca-Sp15                                                                                                          | 14740       | 29   | 7975          | 49   | 1101          | 24   | 34             | 34 | 0.0187325 |
| 334          | <b>GlcNAca1-4</b> Galb1-4GlcNAcb-Sp0                                                                                  | 14776       | 29   | 7246          | 45   | 1111          | 24   | 33             | 33 | 0.0220327 |
| 412          | GalNAca1-3GalNAcb1-3Gala1-4Galb1-4Glc-Sp0                                                                             | 31037       | 61   | 4025          | 25   | 443           | 10   | 32             | 32 | 0.0006176 |
| 411          | GalNAca1-3(Fuca1-2)Galb1-4GlcNAcb1-3GalNAca-Sp14                                                                      | 9571        | 19   | 7053          | 43   | 1117          | 24   | 29             | 29 | 0.0690369 |
| 335          | <b>GlcNAca1-4</b> Galb1-3GlcNAcb-Sp0                                                                                  | 10718       | 21   | 7058          | 43   | 691           | 15   | 27             | 27 | 0.0600414 |
| 80           | GalNAca1-3(Fuca1-2)Galb1-4(Fuca1-3)GlcNAcb-Sp0                                                                        | 21782       | 43   | 4586          | 28   | 348           | 8    | 26             | 26 | 0.0089916 |
| 337          | <b>GlcNAca1-4</b> Galb1-4GlcNAcb1-3Galb1-4(Fuca1-3)GlcNAcb1-3Galb1-4(Fuca1-3)GlcNAcb-Sp0                              | 6068        | 12   | 6095          | 38   | 681           | 15   | 21             | 21 | 0.1583565 |
| 421          | GalNAca1-3(Fuca1-2)Galb1-3GlcNAcb1-3GalNAc-Sp14                                                                       | 8535        | 17   | 5654          | 35   | 559           | 12   | 21             | 21 | 0.1173082 |
| 339          | <b>GlcNAca1-4</b> Galb1-3GalNAc-Sp14                                                                                  | 5136        | 10   | 3777          | 23   | 114           | 2    | 12             | 12 | 0.2657497 |
| 165          | GlcNAca1-6Galb1-4GlcNAcb-Sp8                                                                                          | 2363        | 5    | 612           | 4    | 36            | 1    | 3              | 3  | 0.4864925 |
| 299          | GlcAb1-3GlcNAcb-Sp8                                                                                                   | 187         | 0    | 206           | 1    | 191           | 4    | 2              | 2  | 0.5811762 |
| 206          | Mana1-6(Mana1-3)Mana1-6[Mana1-2Mana1-3]Manb1-4GlcNAcb1-4GlcNAcb-Sp12                                                  | 325         | 1    | 377           | 2    | 121           | 3    | 2              | 2  | 0.5719695 |
| 386          | Fuca1-2Galb1-3GalNAca1-3(Fuca1-2)Galb1-4GlcNAcb-Sp0                                                                   | 1065        | 2    | 270           | 2    | 59            | 1    | 2              | 2  | 0.5498236 |
| 178          | GlcNAcb1-4Galb1-4GlcNAcb-Sp8                                                                                          | 900         | 2    | 157           | 1    | 24            | 1    | 1              | 1  | 0.5619869 |
| 203          | Mana1-2Mana1-2Mana1-3(Mana1-2Mana1-3(Mana1-2Mana1-6)Mana1-6)Manb1-4GlcNAcb1-4GlcNAcb-Sp12                             | 162         | 0    | 167           | 1    | 79            | 2    | 1              | 1  | 0.5879281 |
| 358          | Fuca1-2Galb1-4(Fuca1-3)GlcNAcb1-2Mana1-3(Fuca1-2Galb1-4(Fuca1-3)GlcNAcb1-2Mana1-6)Manb1-4GlcNAcb1-4GlcNAcb-Sp20       | 137         | 0    | 182           | 1    | 71            | 2    | 1              | 1  | 0.5886172 |
| 193          | GlcAb-Sp8                                                                                                             | 137         | 0    | 156           | 1    | 56            | 1    | 1              | 1  | 0.5901858 |
| 290          | Galb1-3(Neu5Aca2-3Galb1-4(Fuca1-3)GlcNAcb1-6)GalNAca-Sp14                                                             | 137         | 0    | 160           | 1    | 55            | 1    | 1              | 1  | 0.590071  |
| 374          | Neu5Aca2-3Galb1-4(Fuca1-3)GlcNAcb1-3GalNAca-Sp14                                                                      | 116         | 0    | 188           | 1    | 47            | 1    | 1              | 1  | 0.5901093 |
| 216          | Neu5Aca2-8Neu5Aca2-8Neu5Aca2-3(GalNAcb1-4)Galb1-4Glc-Sp0                                                              | 109         | 0    | 192           | 1    | 44            | 1    | 1              | 1  | 0.5903387 |
| 51           | Neu5Aca2-6Galb1-4GlcNAcb1-2Mana1-3(Neu5Aca2-6Galb1-4GlcNAcb1-2Mana1-6)Manb1-4GlcNAcb1-4GlcNAcb-N(LT)AVL               | 120         | 0    | 262           | 2    | 18            | 0    | 1              | 1  | 0.5882344 |
| 9            | Neu5Aca-Sp11                                                                                                          | 86          | 0    | 179           | 1    | 39            | 1    | 1              | 1  | 0.5919057 |
| 92           | GalNAcb1-3(Fuca1-2)Galb-Sp8                                                                                           | 604         | 1    | 93            | 1    | 12            | 0    | 1              | 1  | 0.5763662 |
| 388          | Neu5Aca2-3(GalNAcb1-4)Galb1-4GlcNAcb1-3GalNAca-Sp14                                                                   | 115         | 0    | 113           | 1    | 50            | 1    | 1              | 1  | 0.5928987 |
| 332          | (Neu5Aca2-3-Galb1-3)((Neu5Aca2-3-Galb1-4(Fuca1-3)GlcNAcb1-6)GalNAc-Sp14                                               | 101         | 0    | 162           | 1    | 36            | 1    | 1              | 1  | 0.5920967 |
| 236          | Neu5Aca2-3Galb1-3GlcNAcb1-3Galb1-4GlcNAcb-Sp0                                                                         | 89          | 0    | 102           | 1    | 53            | 1    | 1              | 1  | 0.5941962 |
| 433          | Galb1-4GlcNAcb1-4(Galb1-4GlcNAcb1-2)Mana1-3(GlcNAcb1-4)(Galb1-4GlcNAcb1-2)Mana1-6)Manb1-4GlcNAcb1-4GlcNAcb-Sp21       | 83          | 0    | 140           | 1    | 42            | 1    | 1              | 1  | 0.5933949 |

|     |                                                                                                                                                 |     |   |     |   |    |   |   |           |
|-----|-------------------------------------------------------------------------------------------------------------------------------------------------|-----|---|-----|---|----|---|---|-----------|
| 253 | Neu5Aca2-3Galb1-4GlcB-Sp8                                                                                                                       | 20  | 0 | 32  | 0 | 78 | 2 | 1 | 0.5985393 |
| 380 | Fuca1-2Galb1-3(Fuca1-4)GlcNAcb1-3(Galb1-4GlcNAcb1-6)Galb1-4Glc-Sp21                                                                             | 62  | 0 | 134 | 1 | 44 | 1 | 1 | 0.5943488 |
| 281 | Galb1-4(Fuca1-3)[6OSO3]Glc-Sp0                                                                                                                  | 38  | 0 | 181 | 1 | 32 | 1 | 1 | 0.5939292 |
| 235 | Neu5Aca2-3Galb1-3GalNAcb1-3Gala1-4Galb1-4GlcB-Sp0                                                                                               | 59  | 0 | 128 | 1 | 45 | 1 | 1 | 0.594654  |
| 382 | Galb1-3GlcNAcb1-3(Galb1-3GlcNAcb1-3Galb1-4(Fuca1-3)GlcNAcb1-6)Galb1-4Glc-Sp21                                                                   | 78  | 0 | 111 | 1 | 49 | 1 | 1 | 0.5944251 |
| 323 | Neu5Ac(9Ac)a2-3Galb1-4GlcNAcb-Sp0                                                                                                               | 77  | 0 | 127 | 1 | 42 | 1 | 1 | 0.5941199 |
| 210 | [3OSO3]Galb1-4(Fuca1-3)[6OSO3]GlcNAcb-Sp8                                                                                                       | 112 | 0 | 143 | 1 | 34 | 1 | 1 | 0.5924786 |
| 218 | Neu5Aca2-8Neu5Aca2-3(GalNAcb1-4)Galb1-4GlcB-Sp0                                                                                                 | 132 | 0 | 113 | 1 | 40 | 1 | 1 | 0.5926314 |
| 377 | Galb1-3GalNAca1-3(Fuca1-2)Galb1-4GlcNAcb-Sp0                                                                                                    | 331 | 1 | 90  | 1 | 27 | 1 | 1 | 0.5863958 |
| 400 | Gala1-4Galb1-4GlcNAcb1-2Mana1-3(Gala1-4Galb1-4GlcNAcb1-2Mana1-6)Manb1-4GlcNAcb1-4GlcNAcb-LVaNKT                                                 | 111 | 0 | 166 | 1 | 25 | 1 | 1 | 0.5919821 |
| 287 | [6OSO3]Galb1-4[6OSO3]GlcNAcb-Sp0                                                                                                                | 129 | 0 | 121 | 1 | 36 | 1 | 1 | 0.5925932 |
| 399 | Gala1-4Galb1-3GlcNAcb1-2Mana1-3(Gala1-4Galb1-3GlcNAcb1-2Mana1-6)Manb1-4GlcNAcb1-4GlcNAcb-Sp19                                                   | 72  | 0 | 162 | 1 | 29 | 1 | 1 | 0.5934712 |
| 282 | Galb1-4(Fuca1-3)GlcNAcb1-3Galb1-3(Fuca1-4)GlcNAcb-Sp0                                                                                           | 76  | 0 | 114 | 1 | 41 | 1 | 1 | 0.5946921 |
| 232 | Neu5Aca2-3Galb1-3[6OSO3]GalNAca-Sp8                                                                                                             | 76  | 0 | 239 | 1 | 6  | 0 | 1 | 0.5912562 |
| 422 | Gala1-3Galb1-3GlcNAcb1-3GalNAcb-Sp14                                                                                                            | 58  | 0 | 82  | 1 | 51 | 1 | 1 | 0.5962169 |
| 415 | GalNAca1-3(Fuca1-2)Galb1-4(Fuca1-3)GlcNAcb1-3GalNAcb-Sp14                                                                                       | 221 | 0 | 80  | 0 | 36 | 1 | 1 | 0.5906446 |
| 312 | Neu5Aca2-3Galb1-3GalNAca-Sp14                                                                                                                   | 63  | 0 | 101 | 1 | 45 | 1 | 1 | 0.5955309 |
| 240 | Neu5Aca2-3Galb1-4[6OSO3]GlcNAcb-Sp8                                                                                                             | 63  | 0 | 187 | 1 | 20 | 0 | 1 | 0.5932041 |
| 375 | (GalNAcb1-4GlcNAcb1-2Mana1-6)GalNAcb1-4GlcNAcb1-2Mana1-3Manb1-4GlcNAcb1-4GlcNAcb-Sp12                                                           | 104 | 0 | 72  | 0 | 48 | 1 | 1 | 0.594959  |
| 150 | Galb1-4GlcNAcb1-3GalNAca-Sp8                                                                                                                    | 63  | 0 | 94  | 1 | 46 | 1 | 1 | 0.5957596 |
| 314 | Neu5Aca2-6Galb1-4GlcNAcb1-2Mana1-3(Galb1-4GlcNAcb1-2Mana1-6)Manb1-4GlcNAcb1-4GlcNAcb-Sp12                                                       | 90  | 0 | 159 | 1 | 24 | 1 | 1 | 0.5930895 |
| 350 | Galb1-3(Fuca1-4)GlcNAcb1-2Mana1-3(Galb1-3(Fuca1-4)GlcNAcb1-2Mana1-6)Manb1-4GlcNAcb1-4GlcNAcb-Sp19                                               | 91  | 0 | 103 | 1 | 40 | 1 | 1 | 0.5945777 |
| 356 | Fuca1-2Galb1-3GlcNAcb1-2Mana1-3(Fuca1-2Galb1-3GlcNAcb1-2Mana1-6)Manb1-4GlcNAcb1-4GlcNAcb-Sp20                                                   | 67  | 0 | 158 | 1 | 27 | 1 | 1 | 0.593891  |
| 238 | Neu5Aca2-3Galb1-3GlcNAcb-Sp0                                                                                                                    | 52  | 0 | 104 | 1 | 40 | 1 | 1 | 0.5960263 |
| 442 | Fuca1-2Galb1-4(Fuca1-3)GlcNAcb1-2(Fuca1-2Galb1-4(Fuca1-3)GlcNAcb1-4)Mana1-3(Fuca1-2Galb1-4(Fuca1-3)GlcNAcb1-2Mana1-6)Manb1-4GlcNAcb1-4GlcNAcb-N | 52  | 0 | 122 | 1 | 34 | 1 | 1 | 0.595569  |
| 30  | [3OSO3]Galb1-4(Fuca1-3)GlcNAcb-Sp8                                                                                                              | 63  | 0 | 159 | 1 | 22 | 0 | 1 | 0.5941962 |
| 53  | Neu5Aca2-6Galb1-4GlcNAcb1-2Mana1-3(Neu5Aca2-6Galb1-4GlcNAcb1-2Mana1-6)Manb1-4GlcNAcb1-4GlcNAcb-Sp12                                             | 53  | 0 | 127 | 1 | 31 | 1 | 1 | 0.5954547 |
| 304 | GlcNAcb1-4GlcNAcb-Sp12                                                                                                                          | 46  | 0 | 144 | 1 | 27 | 1 | 1 | 0.5952259 |
| 361 | Galb1-3(Fuca1-4)GlcNAcb1-2Mana1-3(Galb1-3(Fuca1-4)GlcNAcb1-2Mana1-6)Manb1-4GlcNAcb1-4(Fuca1-6)GlcNAcb-Sp22                                      | 89  | 0 | 69  | 0 | 44 | 1 | 1 | 0.5957977 |
| 320 | Neu5Aca2-3Galb1-4GlcNAcb1-2Mana1-3(Neu5Aca2-3Galb1-4GlcNAcb1-2Mana1-6)Manb1-4GlcNAcb1-4GlcNAcb-Sp12                                             | 78  | 0 | 92  | 1 | 39 | 1 | 1 | 0.5955309 |
| 140 | Galb1-3GlcNAcb-Sp0                                                                                                                              | 29  | 0 | 89  | 1 | 43 | 1 | 1 | 0.5973595 |
| 284 | Neu5Aca2-3Galb1-3GlcNAcb1-3Galb1-3GlcNAcb-Sp0                                                                                                   | 63  | 0 | 155 | 1 | 21 | 0 | 1 | 0.594387  |
| 427 | Galb1-4GlcNAcb1-3Galb1-4(Fuca1-3GlcNAcb1-6)Galb1-4Glc-Sp21                                                                                      | 75  | 0 | 109 | 1 | 33 | 1 | 1 | 0.5952259 |
| 144 | Galb1-4(Fuca1-3)GlcNAcb1-4Galb1-4(Fuca1-3)GlcNAcb-Sp0                                                                                           | 51  | 0 | 147 | 1 | 24 | 1 | 1 | 0.5950353 |
| 32  | [3OSO3]Galb1-4[6OSO3]GlcNAcb-Sp8                                                                                                                | 93  | 0 | 153 | 1 | 19 | 0 | 1 | 0.5933949 |
| 351 | [6OSO3]GlcNAcb1-3Gal b1-4GlcNAcb-Sp0                                                                                                            | 59  | 0 | 57  | 0 | 49 | 1 | 1 | 0.5972072 |
| 209 | Neu5Aca2-3Galb1-4GlcNAcb1-3Galb1-4(Fuca1-3)GlcNAcb-Sp0                                                                                          | 51  | 0 | 74  | 0 | 44 | 1 | 1 | 0.5970549 |
| 8   | Neu5Aca-Sp8                                                                                                                                     | 61  | 0 | 83  | 1 | 40 | 1 | 1 | 0.5964835 |
| 394 | GlcNAcb1-2Mana1-3(Galb1-4GlcNAcb1-2Mana1-6)Manb1-4GlcNAcb1-4GlcNAcb-Sp12                                                                        | 86  | 0 | 61  | 0 | 44 | 1 | 1 | 0.5962169 |
| 402 | Galb1-3GlcNAcb1-6Galb1-4GlcNAcb-Sp0                                                                                                             | 48  | 0 | 142 | 1 | 24 | 1 | 0 | 0.5953403 |
| 264 | Neu5Aca2-8Neu5Aca-Sp8                                                                                                                           | 129 | 0 | 127 | 1 | 20 | 0 | 0 | 0.592975  |
| 371 | Fuca1-2Galb1-3(Fuca1-4)GlcNAcb1-2Mana1-3(Fuca1-2Galb1-3(Fuca1-4)GlcNAcb1-2Mana1-6)Manb1-4GlcNAcb1-4GlcNAcb-Sp19                                 | 34  | 0 | 65  | 0 | 46 | 1 | 0 | 0.5979685 |
| 256 | Neu5Aca2-6Galb1-4[6OSO3]GlcNAcb-Sp8                                                                                                             | 58  | 0 | 158 | 1 | 17 | 0 | 0 | 0.5946158 |
| 34  | [3OSO3]Galb1-4GlcNAcb-Sp8                                                                                                                       | 72  | 0 | 143 | 1 | 20 | 0 | 0 | 0.5945395 |
| 352 | KDNA2-3Galb1-4(Fuca1-3)GlcNAcb-Sp0                                                                                                              | 77  | 0 | 115 | 1 | 28 | 1 | 0 | 0.5951115 |
| 260 | Neu5Aca2-6Galb1-4GlcNAcb1-3Galb1-4GlcNAcb-Sp0                                                                                                   | 48  | 0 | 95  | 1 | 35 | 1 | 0 | 0.5967121 |
| 383 | Galb1-4GlcNAcb1-2(Galb1-4GlcNAcb1-4)Mana1-3(Galb1-4GlcNAcb1-2(Galb1-4GlcNAcb1-6)Mana1-6)Manb1-4GlcNAcb1-4GlcNAcb-Sp21                           | 20  | 0 | 80  | 0 | 42 | 1 | 0 | 0.5980827 |
| 169 | GlcNAcb1-3GalNAca-Sp8                                                                                                                           | 60  | 0 | 115 | 1 | 28 | 1 | 0 | 0.5957596 |
| 310 | Neu5Aca2-3Galb1-3(Neu5Aca2-3Galb1-4GlcNAcb1-6)GalNAca-Sp14                                                                                      | 59  | 0 | 102 | 1 | 31 | 1 | 0 | 0.5961788 |
| 405 | GlcNAcb1-6(GlcNAcb1-3)GalNAca-Sp14                                                                                                              | 28  | 0 | 66  | 0 | 44 | 1 | 0 | 0.5982349 |
| 212 | Fuca1-2Galb1-4[6OSO3]GlcNAcb-Sp8                                                                                                                | 80  | 0 | 77  | 0 | 36 | 1 | 0 | 0.5961407 |

|     |                                                                                                                 |     |   |     |   |    |   |   |           |
|-----|-----------------------------------------------------------------------------------------------------------------|-----|---|-----|---|----|---|---|-----------|
| 357 | Fuca1-2Galb1-4GlcNAcb1-2Mana1-3(Fuca1-2Galb1-4GlcNAcb1-2Mana1-6)Manb1-4GlcNAcb1-4GlcNAcb-Sp20                   | 87  | 0 | 87  | 1 | 32 | 1 | 0 | 0.5956452 |
| 28  | [3OSO3]Galb1-3GlcNAcb-Sp8                                                                                       | 98  | 0 | 182 | 1 | 4  | 0 | 0 | 0.5926696 |
| 98  | Gala1-3(Fuca1-2)Galb1-3GlcNAcb-Sp0                                                                              | 54  | 0 | 114 | 1 | 27 | 1 | 0 | 0.5960644 |
| 368 | Gala1-3Galb1-4(Fuca1-3)GlcNAcb1-2Mana1-3(Gala1-3Galb1-4(Fuca1-3)GlcNAcb1-2Mana1-6)Manb1-4GlcNAcb1-4GlcNAcb-Sp20 | 25  | 0 | 82  | 1 | 39 | 1 | 0 | 0.5979305 |
| 395 | Neu5Aca2-3Galb1-3GlcNAcb1-3GalNAca-Sp14                                                                         | 44  | 0 | 57  | 0 | 44 | 1 | 0 | 0.5979685 |
| 246 | Neu5Aca2-3Galb1-4(Fuca1-3)GlcNAcb1-3Galb1-4GlcNAcb-Sp8                                                          | 75  | 0 | 88  | 1 | 32 | 1 | 0 | 0.5960644 |
| 48  | Mana1-3(Mana1-6)Manb1-4GlcNAcb1-4GlcNAcb-Sp13                                                                   | 50  | 0 | 102 | 1 | 30 | 1 | 0 | 0.5965597 |
| 52  | Neu5Aca2-6Galb1-4GlcNAcb1-2Mana1-3(Neu5Aca2-6Galb1-4GlcNAcb1-2Mana1-6)Manb1-4GlcNAcb1-4GlcNAcb-Sp8              | 53  | 0 | 80  | 0 | 36 | 1 | 0 | 0.5970549 |
| 347 | GlcNAcb1-2Mana1-3(GlcNAcb1-2Mana1-6)Manb1-4GlcNAcb1-4(Fuca1-6)GlcNAcb-Sp22                                      | 56  | 0 | 75  | 0 | 37 | 1 | 0 | 0.5970929 |
| 329 | GalNAcb1-3Gala1-4Galb1-4GlcNAcb1-3Galb1-4Glc-Sp0                                                                | 25  | 0 | 105 | 1 | 31 | 1 | 0 | 0.5973595 |
| 428 | GlcNAcb1-2Mana1-3(GlcNAcb1-4)(GlcNAcb1-2Mana1-6)Manb1-4GlcNAcb1-4GlcNAcb-Sp21                                   | 58  | 0 | 130 | 1 | 21 | 0 | 0 | 0.5955309 |
| 242 | Neu5Aca2-3Galb1-4(Fuca1-3)GlcNAcb1-3Galb1-4(Fuca1-3)GlcNAcb1-3Galb1-4(Fuca1-3)GlcNAcb-Sp0                       | 56  | 0 | 106 | 1 | 28 | 1 | 0 | 0.596255  |
| 326 | Neu5Aca2-3Galb1-3(Fuca1-4)GlcNAcb1-3Galb1-3(Fuca1-4)GlcNAcb-Sp0                                                 | 52  | 0 | 80  | 0 | 36 | 1 | 0 | 0.5970929 |
| 215 | Neu5Aca2-8Neu5Aca2-8Neu5Aca2-8Neu5Aca2-3(GalNAcb1-4)Galb1-4Glc-Sp0                                              | 85  | 0 | 121 | 1 | 21 | 0 | 0 | 0.5948446 |
| 416 | Galb1-4(Fuca1-3)GlcNAcb1-2Mana1-3(Galb1-4(Fuca1-3)GlcNAcb1-2Mana1-6)Manb1-4GlcNAcb1-4(Fuca1-6)GlcNAcb-Sp22      | 27  | 0 | 94  | 1 | 33 | 1 | 0 | 0.597626  |
| 360 | Mana1-3(Galb1-4GlcNAcb1-2Mana1-6)Manb1-4GlcNAcb1-4GlcNAcb-Sp12                                                  | 66  | 0 | 114 | 1 | 24 | 1 | 0 | 0.597215  |
| 409 | Neu5Aca2-3Galb1-3GalNAcb1-4(Neu5Aca2-8Neu5Aca2-3)Galb1-4Glc-Sp0                                                 | 67  | 0 | 79  | 0 | 33 | 1 | 0 | 0.596674  |
| 224 | Neu5Aca2-3(Neu5Aca2-3Galb1-3GalNAcb1-4)Galb1-4Glc-Sp0                                                           | 59  | 0 | 96  | 1 | 29 | 1 | 0 | 0.5964835 |
| 348 | Galb1-4GlcNAcb1-2Mana1-3(Galb1-4GlcNAcb1-2Mana1-6)Manb1-4GlcNAcb1-4(Fuca1-6)GlcNAcb-Sp22                        | 44  | 0 | 49  | 0 | 43 | 1 | 0 | 0.598311  |
| 390 | Gala1-3Galb1-3GlcNAcb1-2Mana1-3(Gala1-3Galb1-3GlcNAcb1-2Mana1-6)Manb1-4GlcNAcb1-4GlcNAcb-Sp19                   | 48  | 0 | 82  | 1 | 33 | 1 | 0 | 0.5972833 |
| 373 | Neu5Aca2-6Galb1-4GlcNAcb1-3GalNAca-Sp14                                                                         | 124 | 0 | 86  | 1 | 25 | 1 | 0 | 0.5945395 |
| 25  | [3OSO3]Galb1-4[6OSO3]Glc-Sp8                                                                                    | 79  | 0 | 150 | 1 | 11 | 0 | 0 | 0.5943488 |
| 213 | Fuca1-2[6OSO3]Galb1-4[6OSO3]Glc-Sp0                                                                             | 79  | 0 | 114 | 1 | 21 | 0 | 0 | 0.5953403 |
| 378 | Galb1-3GlcNAcb1-3(Galb1-3GlcNAcb1-3Galb1-4GlcNAcb1-6)Galb1-4Glc-Sp0                                             | 57  | 0 | 127 | 1 | 19 | 0 | 0 | 0.5957596 |
| 122 | Galb1-3(Fuca1-4)GlcNAcb-Sp8                                                                                     | 99  | 0 | 138 | 1 | 12 | 0 | 0 | 0.5940055 |
| 115 | Gala1-4Galb1-4Glc-Sp0                                                                                           | 56  | 0 | 53  | 0 | 40 | 1 | 0 | 0.5978163 |
| 315 | Neu5Aca2-6Galb1-4GlcNAcb1-2Mana1-3(GlcNAcb1-2Mana1-6)Manb1-4GlcNAcb1-4GlcNAcb-Sp12                              | 80  | 0 | 69  | 0 | 33 | 1 | 0 | 0.5965597 |
| 166 | GlcNAcb1-2Galb1-3GalNAca-Sp8                                                                                    | 46  | 0 | 104 | 1 | 26 | 1 | 0 | 0.5967883 |
| 259 | Neu5Aca2-6Galb1-4GlcNAcb1-3Galb1-4(Fuca1-3)GlcNAcb1-3Galb1-4(Fuca1-3)GlcNAcb-Sp0                                | 50  | 0 | 125 | 1 | 19 | 0 | 0 | 0.5961025 |
| 288 | 6-H2PO3Glc-Sp10                                                                                                 | 31  | 0 | 96  | 1 | 29 | 1 | 0 | 0.5975498 |
| 137 | Galb1-3Galb-Sp8                                                                                                 | 56  | 0 | 53  | 0 | 38 | 1 | 0 | 0.5978924 |
| 263 | Neu5Aca2-6Galb-Sp8                                                                                              | 72  | 0 | 102 | 1 | 23 | 1 | 0 | 0.5959882 |
| 237 | Fuca1-2[6OSO3]Galb1-4Glc-Sp0                                                                                    | 80  | 0 | 90  | 1 | 25 | 1 | 0 | 0.5960644 |
| 27  | [3OSO3]Galb1-3GalNAca-Sp8                                                                                       | 61  | 0 | 112 | 1 | 21 | 0 | 0 | 0.5961025 |
| 432 | Galb1-4GlcNAcb1-2Mana1-3(GlcNAcb1-4)(Galb1-4GlcNAcb1-2)Manb1-4GlcNAcb1-4GlcNAcb-Sp21                            | 106 | 0 | 118 | 1 | 15 | 0 | 0 | 0.594387  |
| 280 | Galb1-4(Fuca1-3)[6OSO3]GlcNAcb-Sp0                                                                              | 82  | 0 | 127 | 1 | 14 | 0 | 0 | 0.5949972 |
| 258 | Neu5Aca2-6Galb1-4GlcNAcb-Sp8                                                                                    | 51  | 0 | 110 | 1 | 22 | 0 | 0 | 0.5965216 |
| 241 | Neu5Aca2-3Galb1-4(Fuca1-3)[6OSO3]GlcNAcb-Sp8                                                                    | 67  | 0 | 100 | 1 | 23 | 0 | 0 | 0.596255  |
| 118 | Galb1-2Galb-Sp8                                                                                                 | 40  | 0 | 95  | 1 | 26 | 1 | 0 | 0.5973595 |
| 262 | Neu5Aca2-6Galb1-4Glc-Sp8                                                                                        | 67  | 0 | 110 | 1 | 19 | 0 | 0 | 0.5960263 |
| 160 | Galb1-4GlcNAcb-Sp0                                                                                              | 43  | 0 | 113 | 1 | 20 | 0 | 0 | 0.5967883 |
| 22  | [3OSO3]Galb1-4(Fuca1-3)[6OSO3]Glc-Sp0                                                                           | 49  | 0 | 57  | 0 | 35 | 1 | 0 | 0.5981207 |
| 300 | GlcNAcb1-2Mana1-3(Neu5Aca2-6Galb1-4GlcNAcb1-2Mana1-6)Manb1-4GlcNAcb1-4GlcNAcb-Sp12                              | 52  | 0 | 47  | 0 | 37 | 1 | 0 | 0.598311  |
| 265 | Neu5Aca2-8Neu5Aca2-3Galb1-4Glc-Sp0                                                                              | 78  | 0 | 85  | 1 | 24 | 1 | 0 | 0.5963693 |
| 349 | Galb1-3GlcNAcb1-2Mana1-3(Galb1-3GlcNAcb1-2Mana1-6)Manb1-4GlcNAcb1-4(Fuca1-6)GlcNAcb-Sp22                        | 76  | 0 | 84  | 1 | 24 | 1 | 0 | 0.5964835 |
| 217 | Neu5Aca2-8Neu5Aca2-8Neu5Aca2-3Galb1-4Glc-Sp0                                                                    | 46  | 0 | 105 | 1 | 20 | 0 | 0 | 0.5969787 |
| 406 | Gala1-3(Fuca1-2)Galb1-4(Fuca1-3)Glc-Sp21                                                                        | 41  | 0 | 77  | 0 | 28 | 1 | 0 | 0.5979305 |
| 291 | Galb1-3Galb1-4GlcNAcb-Sp8                                                                                       | 61  | 0 | 76  | 0 | 27 | 1 | 0 | 0.5972452 |
| 20  | [3OSO3][6OSO3]Galb1-4[6OSO3]GlcNAcb-Sp0                                                                         | 42  | 0 | 61  | 0 | 33 | 1 | 0 | 0.598311  |
| 234 | Neu5Aca2-3Galb-Sp8                                                                                              | 84  | 0 | 101 | 1 | 17 | 0 | 0 | 0.5957977 |
| 188 | Glc1-6Glc1-6Glc-Sp8                                                                                             | 26  | 0 | 108 | 1 | 20 | 0 | 0 | 0.597626  |

|     |                                                                                                                 |    |   |     |   |    |   |   |           |
|-----|-----------------------------------------------------------------------------------------------------------------|----|---|-----|---|----|---|---|-----------|
| 136 | Galb1-3GalNAcb1-4Galb1-4Glc-Sp8                                                                                 | 61 | 0 | 83  | 1 | 24 | 1 | 0 | 0.5970929 |
| 134 | Galb1-3GalNAcb1-3Gala1-4Galb1-4Glc-Sp0                                                                          | 36 | 0 | 24  | 0 | 43 | 1 | 0 | 0.5995662 |
| 202 | Mana1-2Mana1-6(Mana1-3)Mana1-6[Mana1-2Mana1-3]Manb1-4GlcNAcb1-4GlcNAcb-Sp12                                     | 44 | 0 | 56  | 0 | 33 | 1 | 0 | 0.5984252 |
| 228 | Neu5Aca2-3Galb1-3[6OSO3]GlcNAc-Sp8                                                                              | 45 | 0 | 71  | 0 | 29 | 1 | 0 | 0.5979685 |
| 211 | Fuca1-2[6OSO3]Galb1-4GlcNAc-Sp0                                                                                 | 40 | 0 | 84  | 1 | 25 | 1 | 0 | 0.5978163 |
| 397 | Galb1-4(Fuca1-3)GlcNAcb1-3GalNaca-Sp14                                                                          | 37 | 0 | 32  | 0 | 40 | 1 | 0 | 0.599338  |
| 74  | Fuca1-2Galb1-4Glc-Sp0                                                                                           | 56 | 0 | 96  | 1 | 20 | 0 | 0 | 0.5969406 |
| 319 | Galb1-3GlcNAcb1-2Mana1-3(Galb1-3GlcNAcb1-2Mana1-6)Manb1-4GlcNAcb1-4GlcNAcb-Sp19                                 | 49 | 0 | 94  | 1 | 21 | 0 | 0 | 0.5972452 |
| 58  | Fuca1-2Galb1-3GalNaca-Sp8                                                                                       | 73 | 0 | 69  | 0 | 26 | 1 | 0 | 0.5970929 |
| 435 | Galb1-4Galb-Sp10                                                                                                | 53 | 0 | 67  | 0 | 28 | 1 | 0 | 0.5978543 |
| 404 | GalNAcb1-3Gala1-6Galb1-4Glc-Sp8                                                                                 | 73 | 0 | 115 | 1 | 13 | 0 | 0 | 0.5958358 |
| 354 | KDNa2-3Galb1-4Glc-Sp0                                                                                           | 56 | 0 | 87  | 1 | 22 | 0 | 0 | 0.5972072 |
| 12  | Glc-Sp8                                                                                                         | 47 | 0 | 81  | 0 | 25 | 1 | 0 | 0.597664  |
| 376 | Galb1-3GalNaca1-3(Fuca1-2)Galb1-4Glc-Sp0                                                                        | 55 | 0 | 131 | 1 | 10 | 0 | 0 | 0.5960263 |
| 64  | Fuca1-2Galb1-3GlcNAcb-Sp0                                                                                       | 26 | 0 | 51  | 0 | 34 | 1 | 0 | 0.599262  |
| 31  | [3OSO3]Galb1-4[6OSO3]GlcNAcb-Sp0                                                                                | 35 | 0 | 92  | 1 | 22 | 0 | 0 | 0.5978163 |
| 257 | Neu5Aca2-6Galb1-4GlcNAcb-Sp0                                                                                    | 19 | 0 | 70  | 0 | 29 | 1 | 0 | 0.5989958 |
| 190 | Glc-Sp8                                                                                                         | 76 | 0 | 93  | 1 | 17 | 0 | 0 | 0.5964073 |
| 413 | Fuca1-2Galb1-4(Fuca1-3)GlcNAcb1-3GalNaca-Sp14                                                                   | 67 | 0 | 43  | 0 | 32 | 1 | 0 | 0.5980827 |
| 110 | Gala1-3Galb1-4Glc-Sp0                                                                                           | 36 | 0 | 75  | 0 | 26 | 1 | 0 | 0.598273  |
| 220 | Neu5Aca2-3(6-O-Su)Galb1-4(Fuca1-3)GlcNAcb-Sp8                                                                   | 48 | 0 | 66  | 0 | 27 | 1 | 0 | 0.5981207 |
| 410 | Gala1-3(Fuca1-2)Galb1-4GlcNAcb1-3GalNaca-Sp14                                                                   | 48 | 0 | 84  | 1 | 22 | 0 | 0 | 0.597626  |
| 184 | GlcNAcb1-6GalNaca-Sp14                                                                                          | 55 | 0 | 84  | 1 | 21 | 0 | 0 | 0.5973975 |
| 305 | HOOC(CH3)CH-3-O-GlcNAcb1-4GlcNAcb-Sp10                                                                          | 33 | 0 | 65  | 0 | 28 | 1 | 0 | 0.5986915 |
| 101 | Gala1-3(Fuca1-2)Galb1-4Glc-Sp0                                                                                  | 31 | 0 | 88  | 1 | 22 | 0 | 0 | 0.5981207 |
| 434 | Galb1-4GlcNAcb1-2Mana1-3(GlcNAcb1-4)(Galb1-4GlcNAcb1-6)(Galb1-4GlcNAcb1-2)Mana1-6)Manb1-4GlcNAcb1-4GlcNAc-Sp21  | 73 | 0 | 97  | 1 | 16 | 0 | 0 | 0.5964073 |
| 362 | Neu5Aca2-6GlcNAcb1-4GlcNAc-Sp21                                                                                 | 70 | 0 | 85  | 1 | 19 | 0 | 0 | 0.598644  |
| 429 | GlcNAcb1-4(GlcNAcb1-2)Mana1-3(GlcNAcb1-4)(GlcNAcb1-2Mana1-6)Manb1-4GlcNAcb1-4GlcNAc-Sp21                        | 45 | 0 | 77  | 0 | 23 | 1 | 0 | 0.5979685 |
| 141 | Galb1-3GlcNAcb-Sp8                                                                                              | 50 | 0 | 52  | 0 | 30 | 1 | 0 | 0.5984632 |
| 3   | Mana-Sp8                                                                                                        | 38 | 0 | 86  | 1 | 21 | 0 | 0 | 0.5979685 |
| 214 | Neu5Aca2-3Galb1-3GalNaca-Sp8                                                                                    | 55 | 0 | 78  | 0 | 22 | 0 | 0 | 0.5975879 |
| 187 | Gla1-4Gla-Sp8                                                                                                   | 42 | 0 | 76  | 0 | 23 | 0 | 0 | 0.5981207 |
| 78  | Fucb1-3GlcNAcb-Sp8                                                                                              | 39 | 0 | 91  | 1 | 19 | 0 | 0 | 0.5978163 |
| 408 | Galb1-3GalNAcb1-4(Neu5Aca2-8Neu5Aca2-3)Galb1-4Glc-Sp0                                                           | 57 | 0 | 83  | 1 | 19 | 0 | 0 | 0.5974356 |
| 327 | Neu5Aca2-6Galb1-4GlcNAcb1-3Galb1-4GlcNAcb1-3Galb1-4GlcNAcb-Sp0                                                  | 19 | 0 | 45  | 0 | 33 | 1 | 0 | 0.5997943 |
| 200 | Mana1-2Mana1-3Mana-Sp9                                                                                          | 52 | 0 | 26  | 0 | 35 | 1 | 0 | 0.5991859 |
| 403 | Galb1-3GlcNaca1-6Galb1-4GlcNAcb-Sp0                                                                             | 16 | 0 | 81  | 0 | 23 | 1 | 0 | 0.5989197 |
| 185 | GlcNAcb1-6Galb1-4GlcNAcb-Sp8                                                                                    | 48 | 0 | 46  | 0 | 30 | 1 | 0 | 0.5987675 |
| 167 | GlcNAcb1-3(GlcNAcb1-6)GalNaca-Sp8                                                                               | 47 | 0 | 50  | 0 | 29 | 1 | 0 | 0.5986915 |
| 57  | Fuca1-2Galb1-3(Fuca1-4)GlcNAcb-Sp8                                                                              | 53 | 0 | 43  | 0 | 30 | 1 | 0 | 0.5986915 |
| 426 | Fuca1-2Galb1-3GlcNAcb1-3(Galb1-4GlcNAcb1-6)Galb1-4Glc-Sp21                                                      | 63 | 0 | 78  | 0 | 20 | 0 | 0 | 0.5973595 |
| 162 | Galb1-4Glc-Sp0                                                                                                  | 42 | 0 | 94  | 1 | 17 | 0 | 0 | 0.597664  |
| 440 | [6OSO3]Galb1-3[6OSO3]GlcNAc-Sp0                                                                                 | 41 | 0 | 112 | 1 | 11 | 0 | 0 | 0.5972452 |
| 186 | Gla1-4Glc-Sp8                                                                                                   | 72 | 0 | 70  | 0 | 20 | 0 | 0 | 0.5973214 |
| 370 | Gala1-3(Fuca1-2)Galb1-3GlcNAcb1-2Mana1-3(Gala1-3(Fuca1-2)Galb1-3GlcNAcb1-2Mana1-6)Manb1-4GlcNAcb1-4GlcNAcb-Sp20 | 43 | 0 | 42  | 0 | 31 | 1 | 0 | 0.5990718 |
| 15  | GlcNAcb-Sp0                                                                                                     | 54 | 0 | 70  | 0 | 22 | 0 | 0 | 0.5979305 |
| 385 | Fuca1-2Galb1-3GalNaca1-3(Fuca1-2)Galb1-4Glc-Sp0                                                                 | 84 | 0 | 66  | 0 | 20 | 0 | 0 | 0.5970168 |
| 72  | Fuca1-2Galb1-4GlcNAcb-Sp0                                                                                       | 56 | 0 | 86  | 1 | 16 | 0 | 0 | 0.5974737 |
| 363 | Neu5Aca2-6GlcNAcb1-4GlcNAcb1-4GlcNAc-Sp21                                                                       | 23 | 0 | 51  | 0 | 29 | 1 | 0 | 0.5995662 |
| 103 | Gala1-3(Gala1-4)Galb1-4GlcNAcb-Sp8                                                                              | 63 | 0 | 63  | 0 | 22 | 0 | 0 | 0.5978543 |
| 425 | Galb1-3GlcNAcb1-2Mana1-3(Galb1-3GlcNAcb1-2)(Galb1-3GlcNAcb1-6)Mana1-6)Manb1-4GlcNAcb1-4GlcNAcb-Sp19             | 41 | 0 | 100 | 1 | 14 | 0 | 0 | 0.5975879 |

|     |                                                                                                                      |    |   |     |   |    |   |   |           |
|-----|----------------------------------------------------------------------------------------------------------------------|----|---|-----|---|----|---|---|-----------|
| 68  | Fuca1-2Galb1-4(Fuca1-3)GlcNAcb-Sp0                                                                                   | 44 | 0 | 52  | 0 | 27 | 1 | 0 | 0.5988056 |
| 286 | [3OSO3][4OSO3]Galb1-4GlcNAcb-Sp0                                                                                     | 70 | 0 | 132 | 1 | 2  | 0 | 0 | 0.5957215 |
| 133 | Galb1-3GalNAcb-Sp8                                                                                                   | 8  | 0 | 35  | 0 | 35 | 1 | 0 | 0.6005163 |
| 112 | Gala1-4(Fuca1-2)Galb1-4GlcNAcb-Sp8                                                                                   | 43 | 0 | 53  | 0 | 26 | 1 | 0 | 0.5988436 |
| 392 | Neu5Aca2-3Galb1-3GlcNAcb1-2Mana1-3(Neu5Aca2-3Galb1-3GlcNAcb1-2Mana1-6)Manb1-4GlcNAcb1-4GlcNAc-Sp19                   | 26 | 0 | 73  | 0 | 22 | 0 | 0 | 0.5988817 |
| 233 | Neu5Aca2-3Galb1-3(Neu5Aca2-6)GalNAca-Sp8                                                                             | 46 | 0 | 59  | 0 | 24 | 1 | 0 | 0.5985773 |
| 396 | Fuca1-2Galb1-4GlcNAcb1-3GalNAca-Sp14                                                                                 | 32 | 0 | 48  | 0 | 28 | 1 | 0 | 0.599376  |
| 384 | GlcNAcb1-2(GlcNAcb1-4)Mana1-3(GlcNAcb1-2Mana1-6)Manb1-4GlcNAcb1-4GlcNAc-Sp21                                         | 57 | 0 | 100 | 1 | 11 | 0 | 0 | 0.5970929 |
| 146 | Galb1-4[6OSO3]Glc-Sp0                                                                                                | 84 | 0 | 129 | 1 | 1  | 0 | 0 | 0.5953403 |
| 261 | Neu5Aca2-6Galb1-4Glc-Sp0                                                                                             | 72 | 0 | 72  | 0 | 17 | 0 | 0 | 0.5973595 |
| 99  | Gala1-3(Fuca1-2)Galb1-4(Fuca1-3)GlcNAcb-Sp0                                                                          | 57 | 0 | 98  | 1 | 11 | 0 | 0 | 0.5971691 |
| 308 | Mana1-2Mana1-2Mana1-3(Mana1-2Mana1-6(Mana1-3)Mana1-6)Mana-Sp9                                                        | 53 | 0 | 104 | 1 | 10 | 0 | 0 | 0.5971131 |
| 108 | Gala1-3Galb1-3GlcNAcb-Sp0                                                                                            | 42 | 0 | 33  | 0 | 31 | 1 | 0 | 0.5994521 |
| 441 | Fuca1-2Galb1-4GlcNAcb1-2(Fuca1-2Galb1-4GlcNAcb1-4)Mana1-3(Fuca1-2Galb1-4GlcNAcb1-2Mana1-6)Manb1-4GlcNAcb1-4GlcNAcb-N | 44 | 0 | 47  | 0 | 27 | 1 | 0 | 0.5989958 |
| 132 | Galb1-3GalNAca-Sp16                                                                                                  | 48 | 0 | 71  | 0 | 19 | 0 | 0 | 0.5982349 |
| 33  | [3OSO3]Galb1-4GlcNAcb-Sp0                                                                                            | 59 | 0 | 66  | 0 | 20 | 0 | 0 | 0.5979685 |
| 145 | Galb1-4(Fuca1-3)GlcNAcb1-4Galb1-4(Fuca1-3)GlcNAcb1-4Galb1-4(Fuca1-3)GlcNAcb-Sp0                                      | 66 | 0 | 98  | 1 | 10 | 0 | 0 | 0.5968644 |
| 311 | Neu5Aca2-3Galb1-3(Neu5Aca2-6)GalNAca-Sp14                                                                            | 90 | 0 | 107 | 1 | 5  | 0 | 0 | 0.5957977 |
| 292 | Galb1-4GlcNAcb1-2Mana1-3(Neu5Aca2-6Galb1-4GlcNAcb1-2Mana1-6)Manb1-4GlcNAcb1-4GlcNAcb-Sp12                            | 33 | 0 | 59  | 0 | 24 | 1 | 0 | 0.5990718 |
| 231 | Neu5Aca2-3Galb1-3(Neu5Aca2-3Galb1-4)GlcNAcb-Sp8                                                                      | 20 | 0 | 41  | 0 | 30 | 1 | 0 | 0.6000223 |
| 139 | Galb1-3GlcNAcb1-3Galb1-4Glc-Sp10                                                                                     | 32 | 0 | 86  | 1 | 16 | 0 | 0 | 0.5983871 |
| 387 | Galb1-3GlcNAcb1-3GalNAca-Sp14                                                                                        | 49 | 0 | 64  | 0 | 20 | 0 | 0 | 0.5984252 |
| 317 | Neu5Aca2-8Neu5Aca2-8Neu5Acb-Sp8                                                                                      | 31 | 0 | 26  | 0 | 33 | 1 | 0 | 0.6000603 |
| 60  | Fuca1-2Galb1-3GalNAcb1-4(Neu5Aca2-3)Galb1-4Glc-Sp0                                                                   | 16 | 0 | 21  | 0 | 35 | 1 | 0 | 0.6007443 |
| 143 | Galb1-4(Fuca1-3)GlcNAcb-Sp8                                                                                          | 39 | 0 | 60  | 0 | 22 | 0 | 0 | 0.5988817 |
| 109 | Gala1-3Galb1-4GlcNAcb-Sp8                                                                                            | 27 | 0 | 32  | 0 | 31 | 1 | 0 | 0.6000603 |
| 430 | GlcNAcb1-2Mana1-3(GlcNAcb1-4)(GlcNAcb1-6)(GlcNAcb1-2)Mana1-6)Manb1-4GlcNAcb1-4GlcNAc-Sp21                            | 30 | 0 | 85  | 1 | 15 | 0 | 0 | 0.5985393 |
| 6   | Fuca-Sp9                                                                                                             | 32 | 0 | 31  | 0 | 31 | 1 | 0 | 0.5999083 |
| 168 | GlcNAcb1-3(GlcNAcb1-6)Galb1-4GlcNAcb-Sp8                                                                             | 48 | 0 | 93  | 1 | 11 | 0 | 0 | 0.5977021 |
| 11  | Galb-Sp8                                                                                                             | 52 | 0 | 81  | 0 | 14 | 0 | 0 | 0.5978924 |
| 126 | Galb1-3(GlcNAcb1-6)GalNAc-Sp14                                                                                       | 42 | 0 | 49  | 0 | 24 | 1 | 0 | 0.5991099 |
| 254 | Neu5Aca2-6GalNAca-Sp8                                                                                                | 20 | 0 | 57  | 0 | 24 | 1 | 0 | 0.5996422 |
| 121 | Galb1-3(Fuca1-4)GlcNAcb-Sp0                                                                                          | 43 | 0 | 36  | 0 | 27 | 1 | 0 | 0.5994521 |
| 7   | Rha-Sp8                                                                                                              | 42 | 0 | 74  | 0 | 17 | 0 | 0 | 0.5984252 |
| 119 | Galb1-3(Fuca1-4)GlcNAcb1-3Galb1-4(Fuca1-3)GlcNAcb-Sp0                                                                | 32 | 0 | 53  | 0 | 23 | 1 | 0 | 0.599376  |
| 267 | Neu5Acb2-6GalNAca-Sp8                                                                                                | 41 | 0 | 51  | 0 | 23 | 1 | 0 | 0.5991099 |
| 322 | Fuca1-3(Galb1-4)GlcNAcb1-2Mana1-3(Fuca1-3(Galb1-4)GlcNAcb1-2Mana1-6)Manb1-4GlcNAcb1-4GlcNAcb-Sp20                    | 42 | 0 | 57  | 0 | 21 | 0 | 0 | 0.5989197 |
| 285 | Neu5Aca2-3Galb1-4GlcNAcb1-3Galb1-3GlcNAcb-Sp0                                                                        | 34 | 0 | 70  | 0 | 18 | 0 | 0 | 0.5988436 |
| 50  | Galb1-4GlcNAcb1-2Mana1-3(Galb1-4GlcNAcb1-2Mana1-6)Manb1-4GlcNAcb1-4GlcNAcb-Sp12                                      | 87 | 0 | 112 | 1 | 1  | 0 | 0 | 0.5958739 |
| 222 | Neu5Aca2-3(GalNAcb1-4)Galb1-4GlcNAcb-Sp8                                                                             | 37 | 0 | 62  | 0 | 20 | 0 | 0 | 0.5989577 |
| 328 | Gala1-4Galb1-4GlcNAcb1-3Galb1-4Glc-Sp0                                                                               | 45 | 0 | 93  | 1 | 10 | 0 | 0 | 0.5978543 |
| 196 | KDNa2-3Galb1-3GlcNAcb-Sp0                                                                                            | 47 | 0 | 40  | 0 | 25 | 1 | 0 | 0.5992339 |
| 275 | Neu5Gca2-6Galb1-4GlcNAcb-Sp0                                                                                         | 46 | 0 | 52  | 0 | 22 | 0 | 0 | 0.5989197 |
| 439 | [6OSO3]Galb1-3GlcNAcb-Sp0                                                                                            | 32 | 0 | 15  | 0 | 33 | 1 | 0 | 0.6004403 |
| 96  | GalNAcb1-4GlcNAcb-Sp8                                                                                                | 40 | 0 | 77  | 0 | 15 | 0 | 0 | 0.5984632 |
| 401 | Gala1-3Galb1-4GlcNAcb1-3GalNAca-Sp14                                                                                 | 31 | 0 | 104 | 1 | 8  | 0 | 0 | 0.5980446 |
| 208 | Manb1-4GlcNAcb-Sp0                                                                                                   | 50 | 0 | 87  | 1 | 11 | 0 | 0 | 0.5978543 |
| 97  | Gala1-2Galb-Sp8                                                                                                      | 38 | 0 | 67  | 0 | 18 | 0 | 0 | 0.5988056 |
| 407 | Neu5Aca2-6Galb1-3GlcNAcb1-3(Galb1-4GlcNAcb1-6)Galb1-4Glc-Sp21                                                        | 53 | 0 | 81  | 0 | 12 | 0 | 0 | 0.5979305 |
| 303 | GlcNAcb1-4GlcNAcb-Sp10                                                                                               | 47 | 0 | 26  | 0 | 28 | 1 | 0 | 0.5996422 |
| 163 | Galb1-4Glc-Sp8                                                                                                       | 74 | 0 | 58  | 0 | 17 | 0 | 0 | 0.5978163 |

|     |                                                                                                                          |    |   |     |   |    |   |   |           |
|-----|--------------------------------------------------------------------------------------------------------------------------|----|---|-----|---|----|---|---|-----------|
| 306 | Mana1-6Manb-Sp10                                                                                                         | 23 | 0 | 91  | 1 | 12 | 0 | 0 | 0.5986915 |
| 205 | Mana1-3(Mana1-2Mana1-2Mana1-6)Mana-Sp9                                                                                   | 6  | 0 | 1   | 0 | 38 | 1 | 0 | 0.6017697 |
| 191 | G-ol-Sp8                                                                                                                 | 89 | 0 | 43  | 0 | 19 | 0 | 0 | 0.5977402 |
| 243 | Neu5Aca2-3Galb1-4(Fuca1-3)GlcNAcb-Sp0                                                                                    | 49 | 0 | 69  | 0 | 15 | 0 | 0 | 0.5984252 |
| 95  | GalNAcb1-4GlcNAcb-Sp0                                                                                                    | 22 | 0 | 66  | 0 | 19 | 0 | 0 | 0.5994141 |
| 424 | Gala1-3(Fuca1-2)Galb1-4GlcNAcb1-2Mana1-3(Gala1-3(Fuca1-2)Galb1-4GlcNAcb1-2Mana1-6)Manb1-4GlcNAcb1-4(Fuca1-6)GlcNAcb-Sp22 | 65 | 0 | 90  | 1 | 8  | 0 | 0 | 0.5972833 |
| 172 | GlcNAcb1-3Galb1-4GlcNAcb-Sp0                                                                                             | 29 | 0 | 33  | 0 | 27 | 1 | 0 | 0.6000983 |
| 367 | Gala1-3(Fuca1-2)Galb1-4GlcNAcb1-2Mana1-3(Gala1-3(Fuca1-2)Galb1-4GlcNAcb1-2Mana1-6)Manb1-4GlcNAcb1-4GlcNAcb-Sp20          | 14 | 0 | 51  | 0 | 23 | 1 | 0 | 0.6001363 |
| 138 | Galb1-3GlcNAcb1-3Galb1-4GlcNAcb-Sp0                                                                                      | 28 | 0 | 65  | 0 | 18 | 0 | 0 | 0.599262  |
| 340 | Mana1-3(Neu5Aca2-6Galb1-4GlcNAcb1-2Mana1-6)Manb1-4GlcNAcb1-4GlcNAcb-Sp12                                                 | 29 | 0 | 60  | 0 | 19 | 0 | 0 | 0.599376  |
| 35  | [3OSO3]Galb-Sp8                                                                                                          | 66 | 0 | 79  | 0 | 11 | 0 | 0 | 0.5975498 |
| 36  | [4OSO3][6OSO3]Galb1-4GlcNAcb-Sp0                                                                                         | 28 | 0 | 68  | 0 | 17 | 0 | 0 | 0.5991859 |
| 154 | Galb1-4GlcNAcb1-3Galb1-4GlcNAcb-Sp0                                                                                      | 31 | 0 | 42  | 0 | 24 | 1 | 0 | 0.5997943 |
| 29  | [3OSO3]Galb1-4(Fuca1-3)GlcNAcb-Sp0                                                                                       | 39 | 0 | 49  | 0 | 21 | 0 | 0 | 0.599338  |
| 277 | Galb1-3(Neu5Aca2-3Galb1-4GlcNAcb1-6)GalNAca-Sp14                                                                         | 53 | 0 | 50  | 0 | 19 | 0 | 0 | 0.5988436 |
| 116 | Gala1-4GlcNAcb-Sp8                                                                                                       | 64 | 0 | 66  | 0 | 13 | 0 | 0 | 0.5980446 |
| 149 | Galb1-4GalNAcb1-3(Fuca1-2)Galb1-4GlcNAcb-Sp8                                                                             | 29 | 0 | 49  | 0 | 21 | 0 | 0 | 0.5997182 |
| 359 | Gala1-3Galb1-4GlcNAcb1-2Mana1-3(Gala1-3Galb1-4GlcNAcb1-2Mana1-6)Manb1-4GlcNAcb1-4GlcNAcb-Sp20                            | 32 | 0 | 73  | 0 | 14 | 0 | 0 | 0.5989577 |
| 414 | Gala1-3(Fuca1-2)Galb1-4(Fuca1-3)GlcNAcb1-3GalNAcb-Sp14                                                                   | 62 | 0 | 70  | 0 | 12 | 0 | 0 | 0.5980066 |
| 47  | Mana1-3(Mana1-6)Manb1-4GlcNAcb1-4GlcNAcb-Sp12                                                                            | 62 | 0 | 54  | 0 | 17 | 0 | 0 | 0.5984252 |
| 10  | Neu5Acb-Sp8                                                                                                              | 42 | 0 | 38  | 0 | 23 | 1 | 0 | 0.5995662 |
| 345 | Galb1-4GlcNAcb1-2Mana1-6Manb1-4GlcNAcb1-4GlcNAcb-Sp12                                                                    | 27 | 0 | 47  | 0 | 21 | 0 | 0 | 0.5998703 |
| 325 | Neu5Aca2-6Galb1-4GlcNAcb1-3Galb1-3GlcNAcb-Sp0                                                                            | 35 | 0 | 36  | 0 | 24 | 1 | 0 | 0.5998703 |
| 128 | Galb1-3(Neu5Aca2-6)GalNAca-Sp14                                                                                          | 23 | 0 | 32  | 0 | 26 | 1 | 0 | 0.6004023 |
| 423 | Fuca1-2Galb1-3GlcNAcb1-2Mana1-3(Fuca1-2Galb1-3GlcNAcb1-2Mana1-6)Manb1-4GlcNAcb1-4(Fuca1-6)GlcNAcb-Sp22                   | 43 | 0 | 42  | 0 | 21 | 0 | 0 | 0.5994521 |
| 289 | Gala1-3(Fuca1-2)Galb-Sp18                                                                                                | 52 | 0 | 64  | 0 | 14 | 0 | 0 | 0.5985393 |
| 192 | GlcAa-Sp8                                                                                                                | 39 | 0 | 109 | 1 | 2  | 0 | 0 | 0.5977782 |
| 69  | Fuca1-2Galb1-4(Fuca1-3)GlcNAcb-Sp8                                                                                       | 22 | 0 | 17  | 0 | 29 | 1 | 0 | 0.6008962 |
| 120 | Galb1-3(Fuca1-4)GlcNAcb1-3Galb1-4GlcNAcb-Sp0                                                                             | 58 | 0 | 110 | 1 | 0  | 0 | 0 | 0.5970929 |
| 94  | GalNAcb1-4(Fuca1-3)GlcNAcb-Sp0                                                                                           | 60 | 0 | 93  | 1 | 5  | 0 | 0 | 0.5974737 |
| 100 | Gala1-3(Fuca1-2)Galb1-4GlcNAcb-Sp0                                                                                       | 57 | 0 | 63  | 0 | 13 | 0 | 0 | 0.5984252 |
| 341 | Neu5Aca2-6Galb1-4GlcNAcb1-2Mana1-3(Mana1-6)Manb1-4GlcNAcb1-4GlcNAcb-Sp12                                                 | 44 | 0 | 45  | 0 | 19 | 0 | 0 | 0.599376  |
| 244 | Neu5Aca2-3Galb1-4(Fuca1-3)GlcNAcb-Sp8                                                                                    | 36 | 0 | 52  | 0 | 18 | 0 | 0 | 0.5994521 |
| 247 | Neu5Aca2-3Galb1-4GlcNAcb1-3Galb1-4GlcNAcb1-3Galb1-4GlcNAcb-Sp0                                                           | 49 | 0 | 31  | 0 | 23 | 0 | 0 | 0.5995662 |
| 23  | [3OSO3]Galb1-4Glc-Sp8                                                                                                    | 52 | 0 | 44  | 0 | 19 | 0 | 0 | 0.5991099 |
| 124 | Galb1-4GlcNAcb1-6GalNAca-Sp8                                                                                             | 27 | 0 | 27  | 0 | 26 | 1 | 0 | 0.6004403 |
| 309 | Mana1-2Mana1-2Mana1-3(Mana1-2Mana1-6(Mana1-2Mana1-3)Mana1-6)Mana-Sp9                                                     | 48 | 0 | 71  | 0 | 11 | 0 | 0 | 0.5985393 |
| 26  | [3OSO3]Galb1-3(Fuca1-4)GlcNAcb-Sp8                                                                                       | 35 | 0 | 75  | 0 | 11 | 0 | 0 | 0.5988817 |
| 142 | Galb1-4(Fuca1-3)GlcNAcb-Sp0                                                                                              | 61 | 0 | 80  | 0 | 7  | 0 | 0 | 0.5978543 |
| 67  | Fuca1-2Galb1-4(Fuca1-3)GlcNAcb1-3Galb1-4(Fuca1-3)GlcNAcb1-3Galb1-4(Fuca1-3)GlcNAcb-Sp0                                   | 37 | 0 | 39  | 0 | 21 | 0 | 0 | 0.5997943 |
| 225 | Neu5Aca2-3(Neu5Aca2-6)GalNAca-Sp8                                                                                        | 24 | 0 | 29  | 0 | 25 | 1 | 0 | 0.6005163 |
| 176 | GlcNAcb1-4-MDPLys                                                                                                        | 41 | 0 | 48  | 0 | 18 | 0 | 0 | 0.5994141 |
| 127 | Galb1-3(Neu5Aca2-6)GalNAca-Sp8                                                                                           | 49 | 0 | 44  | 0 | 18 | 0 | 0 | 0.599262  |
| 5   | Fuca-Sp8                                                                                                                 | 46 | 0 | 99  | 1 | 3  | 0 | 0 | 0.5978543 |
| 250 | Neu5Aca2-3Galb1-4GlcNAcb1-3Galb1-4GlcNAcb-Sp0                                                                            | 31 | 0 | 33  | 0 | 23 | 1 | 0 | 0.6001743 |
| 201 | Mana1-6[Mana1-2Mana1-3]Mana1-6[Mana1-2Mana1-3]Manb1-4GlcNAcb1-4GlcNAcb-Sp12                                              | 25 | 0 | 34  | 0 | 23 | 1 | 0 | 0.6003643 |
| 76  | Fuca1-3GlcNAcb-Sp8                                                                                                       | 30 | 0 | 86  | 1 | 8  | 0 | 0 | 0.5987675 |
| 189 | Glc1-4Glc-Sp8                                                                                                            | 48 | 0 | 51  | 0 | 16 | 0 | 0 | 0.5991099 |
| 391 | Gala1-3Galb1-3(Fuca1-4)GlcNAcb1-2Mana1-3(Gala1-3Galb1-3(Fuca1-4)GlcNAcb1-2Mana1-6)Manb1-4GlcNAcb1-4GlcNAcb-Sp19          | 33 | 0 | 18  | 0 | 27 | 1 | 0 | 0.6005163 |
| 41  | [6OSO3]Galb1-4GlcNAcb-Sp8                                                                                                | 34 | 0 | 42  | 0 | 19 | 0 | 0 | 0.5998703 |
| 24  | [3OSO3]Galb1-4[6OSO3]Glc-Sp0                                                                                             | 37 | 0 | 59  | 0 | 14 | 0 | 0 | 0.5993    |

|     |                                                                                                      |    |   |    |   |    |   |   |           |
|-----|------------------------------------------------------------------------------------------------------|----|---|----|---|----|---|---|-----------|
| 226 | Neu5Aca2-3GalNAca-Sp8                                                                                | 45 | 0 | 50 | 0 | 16 | 0 | 0 | 0.599262  |
| 129 | Galb1-3(Neu5Acb2-6)GalNAca-Sp8                                                                       | 11 | 0 | 9  | 0 | 30 | 1 | 0 | 0.6015798 |
| 194 | GlcAb1-3Galb-Sp8                                                                                     | 50 | 0 | 98 | 1 | 1  | 0 | 0 | 0.5978163 |
| 324 | Neu5Ac(9Ac)a2-3Galb1-3GlcNAcb-Sp0                                                                    | 41 | 0 | 37 | 0 | 19 | 0 | 0 | 0.5997943 |
| 342 | Neu5Aca2-6Galb1-4GlcNAcb1-2Mana1-6Manb1-4GlcNAcb1-4GlcNAc-Sp12                                       | 7  | 0 | 31 | 0 | 24 | 1 | 0 | 0.6011241 |
| 114 | Gala1-4Galb1-4GlcNAcb-Sp8                                                                            | 28 | 0 | 63 | 0 | 13 | 0 | 0 | 0.5995281 |
| 276 | Neu5Gca-Sp8                                                                                          | 78 | 0 | 33 | 0 | 16 | 0 | 0 | 0.5986534 |
| 85  | GlcNAcb1-3Galb1-3GalNAca-Sp8                                                                         | 28 | 0 | 31 | 0 | 21 | 0 | 0 | 0.6004403 |
| 283 | Galb1-4GlcNAcb1-3Galb1-3GlcNAcb-Sp0                                                                  | 65 | 0 | 35 | 0 | 17 | 0 | 0 | 0.5990338 |
| 113 | Gala1-4Galb1-4GlcNAcb-Sp0                                                                            | 40 | 0 | 66 | 0 | 10 | 0 | 0 | 0.5990718 |
| 2   | Glca-Sp8                                                                                             | 55 | 0 | 63 | 0 | 10 | 0 | 0 | 0.5986154 |
| 62  | Fuca1-2Galb1-3GlcNAcb1-3Galb1-4Glc-Sp8                                                               | 41 | 0 | 44 | 0 | 16 | 0 | 0 | 0.5996422 |
| 307 | Mana1-6(Mana1-3)Mana1-6(Mana1-3)Manb-Sp10                                                            | 52 | 0 | 62 | 0 | 10 | 0 | 0 | 0.5987675 |
| 313 | Neu5Aca2-3Galb1-4GlcNAcb1-2Mana1-3(Neu5Aca2-6Galb1-4GlcNAcb1-2Mana1-6)Manb1-4GlcNAcb1-4GlcNAcb-Sp12  | 74 | 0 | 93 | 1 | -1 | 0 | 0 | 0.5971691 |
| 343 | Neu5Aca2-6Galb1-4GlcNAcb1-2Mana1-3Manb1-4GlcNAcb1-4GlcNAc-Sp12                                       | 19 | 0 | 43 | 0 | 18 | 0 | 0 | 0.6004403 |
| 43  | Neu5Aca2-3[6OSO3]Galb1-4GlcNAcb-Sp8                                                                  | 26 | 0 | 58 | 0 | 13 | 0 | 0 | 0.5997943 |
| 298 | GalNAcb1-3Galb-Sp8                                                                                   | 26 | 0 | 40 | 0 | 18 | 0 | 0 | 0.6002883 |
| 221 | Neu5Aca2-3(GalNAcb1-4)Galb1-4GlcNAcb-Sp0                                                             | 45 | 0 | 38 | 0 | 17 | 0 | 0 | 0.5996802 |
| 273 | Neu5Gca2-3Galb1-4Glc-Sp0                                                                             | 32 | 0 | 29 | 0 | 20 | 0 | 0 | 0.6004023 |
| 301 | GlcNAcb1-2Mana1-3(GlcNAcb1-2Mana1-6)Manb1-4GlcNAcb1-4GlcNAcb-Sp12                                    | 32 | 0 | 34 | 0 | 19 | 0 | 0 | 0.6002503 |
| 207 | Mana1-6(Mana1-3)Mana1-6(Mana1-3)Manb1-4GlcNAcb1-4 GlcNAcb-Sp12                                       | 7  | 0 | 22 | 0 | 24 | 1 | 0 | 0.6014659 |
| 75  | Fuca1-2Galb-Sp8                                                                                      | 14 | 0 | 83 | 1 | 7  | 0 | 0 | 0.5995281 |
| 63  | Fuca1-2Galb1-3GlcNAcb1-3Galb1-4Glc-Sp10                                                              | 19 | 0 | 9  | 0 | 27 | 1 | 0 | 0.60139   |
| 1   | Gala-Sp8                                                                                             | 47 | 0 | 66 | 0 | 8  | 0 | 0 | 0.5988817 |
| 159 | Galb1-3(Galb1-4GlcNAcb1-6)GalNAc-Sp14                                                                | 30 | 0 | 24 | 0 | 21 | 0 | 0 | 0.6006303 |
| 229 | Neu5Aca2-3Galb1-3(Fuca1-4)GlcNAcb-Sp8                                                                | 15 | 0 | 13 | 0 | 26 | 1 | 0 | 0.601428  |
| 436 | Galb1-6Galb-Sp10                                                                                     | 38 | 0 | 26 | 0 | 20 | 0 | 0 | 0.6002883 |
| 239 | Neu5Aca2-3Galb1-3GlcNAcb-Sp8                                                                         | 44 | 0 | 31 | 0 | 18 | 0 | 0 | 0.5999463 |
| 418 | GlcNAcb1-2Mana1-3(GlcNAcb1-2(GlcNAcb1-6)Mana1-6)Manb1-4GlcNAcb1-4GlcNAcb-Sp19                        | 42 | 0 | 43 | 0 | 15 | 0 | 0 | 0.5996802 |
| 245 | Neu5Aca2-3Galb1-4(Fuca1-3)GlcNAcb1-3Galb-Sp8                                                         | 15 | 0 | 12 | 0 | 26 | 1 | 0 | 0.6014659 |
| 270 | Neu5Gca2-3Galb1-3GlcNAcb-Sp0                                                                         | 30 | 0 | 59 | 0 | 11 | 0 | 0 | 0.5996802 |
| 219 | Neu5Aca2-8Neu5Aca2-8Neu5Aca-Sp8                                                                      | 61 | 0 | 68 | 0 | 6  | 0 | 0 | 0.5983491 |
| 318 | Neu5Gcb2-6Galb1-4GlcNAc-Sp8                                                                          | 52 | 0 | 78 | 0 | 4  | 0 | 0 | 0.5983871 |
| 197 | KDNa2-3Galb1-4GlcNAcb-Sp0                                                                            | 33 | 0 | 42 | 0 | 15 | 0 | 0 | 0.6000603 |
| 355 | KDNa2-3Galb1-3GalNAca-Sp14                                                                           | 45 | 0 | 37 | 0 | 16 | 0 | 0 | 0.5997562 |
| 268 | Neu5Acb2-6Galb1-4GlcNAcb-Sp8                                                                         | 35 | 0 | 26 | 0 | 19 | 0 | 0 | 0.6004403 |
| 431 | GlcNAcb1-4(GlcNAcb1-2)Mana1-3(GlcNAcb1-4)(GlcNAcb1-6(GlcNAcb1-2)Mana1-6)Manb1-4GlcNAcb1-4GlcNAc-Sp21 | 48 | 0 | 49 | 0 | 12 | 0 | 0 | 0.599338  |
| 161 | Galb1-4GlcNAcb-Sp8                                                                                   | 51 | 0 | 55 | 0 | 9  | 0 | 0 | 0.5991099 |
| 73  | Fuca1-2Galb1-4GlcNAcb-Sp8                                                                            | 27 | 0 | 51 | 0 | 12 | 0 | 0 | 0.6000603 |
| 274 | Neu5Gca2-6GalNAca-Sp0                                                                                | 30 | 0 | 48 | 0 | 13 | 0 | 0 | 0.6000223 |
| 279 | Galb1-3GlcNAcb1-3Galb1-3GlcNAcb-Sp0                                                                  | 20 | 0 | 31 | 0 | 19 | 0 | 0 | 0.6008203 |
| 302 | GlcNAcb1-3Man-Sp10                                                                                   | 26 | 0 | 40 | 0 | 15 | 0 | 0 | 0.6004023 |
| 294 | Galb1-4GlcNAcb1-3(GlcNAcb1-6)Galb1-4GlcNAc-Sp0                                                       | 40 | 0 | 54 | 0 | 10 | 0 | 0 | 0.5995281 |
| 135 | Galb1-3GalNAcb1-4(Neu5Aca2-3)Galb1-4Glc-Sp0                                                          | 33 | 0 | 32 | 0 | 17 | 0 | 0 | 0.6003643 |
| 227 | Neu5Aca2-3GalNAcb1-4GlcNAcb-Sp0                                                                      | 21 | 0 | 16 | 0 | 22 | 0 | 0 | 0.6012381 |
| 353 | KDNa2-6Galb1-4GlcNAc-Sp0                                                                             | 33 | 0 | 70 | 0 | 6  | 0 | 0 | 0.599338  |
| 316 | Neu5Aca2-8Neu5Acb-Sp17                                                                               | 32 | 0 | 40 | 0 | 14 | 0 | 0 | 0.6002123 |
| 93  | GalNAcb1-3Gala1-4Galb1-4GlcNAcb-Sp0                                                                  | 40 | 0 | 81 | 0 | 2  | 0 | 0 | 0.5988056 |
| 179 | (GlcNAcb1-4)6b-Sp8                                                                                   | 38 | 0 | 39 | 0 | 14 | 0 | 0 | 0.6000223 |
| 266 | Galb1-3(Fuca1-4)GlcNAcb1-3Galb1-3(Fuca1-4)GlcNAcb-Sp0                                                | 56 | 0 | 47 | 0 | 10 | 0 | 0 | 0.5991859 |
| 156 | Galb1-4GlcNAcb1-3Galb1-4Glc-Sp8                                                                      | 32 | 0 | 31 | 0 | 16 | 0 | 0 | 0.6004783 |

|     |                                                                                                        |     |   |    |   |    |   |   |           |
|-----|--------------------------------------------------------------------------------------------------------|-----|---|----|---|----|---|---|-----------|
| 91  | GalNAcb1-3GalNAca-Sp8                                                                                  | 41  | 0 | 35 | 0 | 14 | 0 | 0 | 0.6000603 |
| 125 | Galb1-3(GlcNAcb1-6)GalNAca-Sp8                                                                         | 11  | 0 | 29 | 0 | 19 | 0 | 0 | 0.6012381 |
| 151 | Galb1-4GlcNAcb1-3GalNAc-Sp14                                                                           | 45  | 0 | 8  | 0 | 21 | 0 | 0 | 0.6006683 |
| 49  | GlcNAcb1-2Mana1-3(GlcNAcb1-2Mana1-6)Manb1-4GlcNAcb1-4GlcNAcb-Sp13                                      | 26  | 0 | 44 | 0 | 13 | 0 | 0 | 0.6003263 |
| 183 | GlcNAcb1-6GalNAca-Sp8                                                                                  | 19  | 0 | 4  | 0 | 25 | 1 | 0 | 0.6016558 |
| 195 | GlcAb1-6Galb-Sp8                                                                                       | 29  | 0 | 54 | 0 | 9  | 0 | 0 | 0.5999843 |
| 158 | Galb1-3(Galb1-4GlcNAcb1-6)GalNAca-Sp8                                                                  | 31  | 0 | 47 | 0 | 11 | 0 | 0 | 0.6000983 |
| 56  | Fuca1-2Galb1-3GalNAcb1-3Gala1-4Galb1-4Glc-Sp9                                                          | 35  | 0 | 56 | 0 | 8  | 0 | 0 | 0.5997182 |
| 102 | Gala1-3(Fuca1-2)Galb-Sp8                                                                               | 38  | 0 | 43 | 0 | 12 | 0 | 0 | 0.5999463 |
| 148 | Galb1-4GalNAca1-3(Fuca1-2)Galb1-4GlcNAcb-Sp8                                                           | 18  | 0 | 45 | 0 | 13 | 0 | 0 | 0.6005923 |
| 181 | GlcNAcb1-4GlcNAcb1-4GlcNAcb-Sp8                                                                        | 28  | 0 | 41 | 0 | 13 | 0 | 0 | 0.6003643 |
| 295 | Galb1-4GlcNAca1-6Galb1-4GlcNAcb-Sp0                                                                    | 19  | 0 | 52 | 0 | 11 | 0 | 0 | 0.6003643 |
| 372 | Neu5Aca2-3Galb1-4GlcNAcb1-3GalNAc-Sp14                                                                 | 37  | 0 | 42 | 0 | 12 | 0 | 0 | 0.6000223 |
| 278 | Galb1-3GalNAca-Sp14                                                                                    | 30  | 0 | 29 | 0 | 16 | 0 | 0 | 0.6006303 |
| 346 | Galb1-4GlcNAcb1-2Mana1-3(Mana1-6)Manb1-4GlcNAcb1-4GlcNAcb-Sp12                                         | 39  | 0 | 47 | 0 | 10 | 0 | 0 | 0.5998323 |
| 381 | Fuca1-2Galb1-3(Fuca1-4)GlcNAcb1-3(Galb1-4(Fuca1-3)GlcNAcb1-6)Galb1-4Glc-Sp21                           | 42  | 0 | 73 | 0 | 2  | 0 | 0 | 0.5990338 |
| 131 | Galb1-3GalNAca-Sp8                                                                                     | 103 | 0 | 16 | 0 | 12 | 0 | 0 | 0.5985013 |
| 153 | Galb1-4GlcNAcb1-3Galb1-4GlcNAcb1-3Galb1-4GlcNAcb-Sp0                                                   | 17  | 0 | 14 | 0 | 21 | 0 | 0 | 0.6015039 |
| 251 | Fuca1-2Galb1-4[6OSO3]Glc-Sp0                                                                           | 9   | 0 | 19 | 0 | 20 | 0 | 0 | 0.6016558 |
| 272 | Neu5Gca2-3Galb1-4GlcNAcb-Sp0                                                                           | 37  | 0 | 30 | 0 | 14 | 0 | 0 | 0.6004023 |
| 21  | [3OSO3][6OSO3]Galb1-4GlcNAcb-Sp0                                                                       | 48  | 0 | 49 | 0 | 8  | 0 | 0 | 0.5994901 |
| 123 | Galb1-3(Fuca1-4)GlcNAcb-Sp8                                                                            | 51  | 0 | 56 | 0 | 5  | 0 | 0 | 0.5992239 |
| 77  | Fuca1-4GlcNAcb-Sp8                                                                                     | 24  | 0 | 85 | 1 | -1 | 0 | 0 | 0.599376  |
| 104 | Gala1-3GalNAca-Sp8                                                                                     | 17  | 0 | 33 | 0 | 15 | 0 | 0 | 0.6010102 |
| 44  | [6OSO3]GlcNAcb-Sp8                                                                                     | 37  | 0 | 48 | 0 | 9  | 0 | 0 | 0.5999083 |
| 54  | Neu5Aca2-6Galb1-4GlcNAcb1-2Mana1-3(Neu5Aca2-6Galb1-4GlcNAcb1-2Mana1-6)Manb1-4GlcNAcb1-4GlcNAcb-Sp13    | 61  | 0 | 78 | 0 | -2 | 0 | 0 | 0.598273  |
| 438 | GalNAcb1-6GalNAcb-Sp8                                                                                  | 16  | 0 | 45 | 0 | 11 | 0 | 0 | 0.6007443 |
| 417 | Fuca1-2Galb1-4GlcNAcb1-2Mana1-3(Fuca1-2Galb1-4GlcNAcb1-2Mana1-6)Manb1-4GlcNAcb1-4(Fuca1-6)GlcNAcb-Sp22 | 23  | 0 | 62 | 0 | 6  | 0 | 0 | 0.6000223 |
| 248 | Neu5Aca2-3Galb1-4GlcNAcb-Sp0                                                                           | 40  | 0 | 40 | 0 | 10 | 0 | 0 | 0.6000603 |
| 364 | Fuca1-2Galb1-3GlcNAcb1-3(Galb1-4(Fuca1-3)GlcNAcb1-6)Galb1-4Glc-Sp21                                    | 6   | 0 | 22 | 0 | 18 | 0 | 0 | 0.6017317 |
| 204 | Mana1-3(Mana1-6)Mana-Sp9                                                                               | 24  | 0 | 23 | 0 | 16 | 0 | 0 | 0.6010862 |
| 19  | GlcNAcb1-3(GlcNAcb1-4)(GlcNAcb1-6)GlcNAc-Sp8                                                           | 28  | 0 | 43 | 0 | 10 | 0 | 0 | 0.6004023 |
| 173 | GlcNAcb1-3Galb1-4GlcNAcb-Sp8                                                                           | 16  | 0 | 17 | 0 | 17 | 0 | 0 | 0.6015798 |
| 230 | Neu5Aca2-3Galb1-3(Fuca1-4)GlcNAcb1-3Galb1-4(Fuca1-3)GlcNAcb-Sp0                                        | 47  | 0 | 34 | 0 | 10 | 0 | 0 | 0.6000223 |
| 180 | (GlcNAcb1-4)5b-Sp8                                                                                     | 9   | 0 | 49 | 0 | 9  | 0 | 0 | 0.6009342 |
| 420 | Gala1-3(Fuca1-2)Galb1-3GlcNAcb1-3GalNAc-Sp14                                                           | 27  | 0 | 37 | 0 | 11 | 0 | 0 | 0.6006303 |
| 111 | Gala1-3Galb-Sp8                                                                                        | 25  | 0 | 36 | 0 | 11 | 0 | 0 | 0.6007443 |
| 59  | Fuca1-2Galb1-3GalNAca-Sp14                                                                             | 43  | 0 | 45 | 0 | 7  | 0 | 0 | 0.5998703 |
| 105 | Gala1-3GalNAca-Sp16                                                                                    | 28  | 0 | 25 | 0 | 13 | 0 | 0 | 0.6009722 |
| 198 | Mana1-2Mana1-2Mana1-3Mana-Sp9                                                                          | 14  | 0 | 36 | 0 | 11 | 0 | 0 | 0.6011621 |
| 17  | GlcN(Gc)b-Sp8                                                                                          | 28  | 0 | 46 | 0 | 7  | 0 | 0 | 0.6004023 |
| 199 | Mana1-2Mana1-3(Mana1-2Mana1-6)Mana-Sp9                                                                 | 40  | 0 | 18 | 0 | 14 | 0 | 0 | 0.6007443 |
| 147 | Galb1-4[6OSO3]Glc-Sp8                                                                                  | 26  | 0 | 70 | 0 | 1  | 0 | 0 | 0.5997943 |
| 16  | GlcNAcb-Sp8                                                                                            | 75  | 0 | 30 | 0 | 8  | 0 | 0 | 0.5991859 |
| 182 | GlcNAcb1-6(Galb1-3)GalNAca-Sp8                                                                         | 33  | 0 | 12 | 0 | 16 | 0 | 0 | 0.6011621 |
| 271 | Neu5Gca2-3Galb1-4(Fuca1-3)GlcNAcb-Sp0                                                                  | 30  | 0 | 41 | 0 | 8  | 0 | 0 | 0.6004783 |
| 252 | Neu5Aca2-3Galb1-4Glc-Sp0                                                                               | 25  | 0 | 20 | 0 | 14 | 0 | 0 | 0.6012381 |
| 45  | Neu5Ac(9Ac)a-Sp8                                                                                       | 37  | 0 | 47 | 0 | 5  | 0 | 0 | 0.6000983 |
| 321 | Neu5Aca2-6Galb1-4GlcNAcb1-2Mana1-3(Neu5Aca2-3Galb1-4GlcNAcb1-2Mana1-6)Manb1-4GlcNAcb1-4GlcNAcb-Sp12    | 42  | 0 | 30 | 0 | 9  | 0 | 0 | 0.6004023 |
| 70  | Fuca1-2Galb1-4GlcNAcb1-3Galb1-4GlcNAcb-Sp0                                                             | 32  | 0 | 26 | 0 | 11 | 0 | 0 | 0.6008583 |
| 42  | [6OSO3]Galb1-4[6OSO3]Glc-Sp8                                                                           | 20  | 0 | 50 | 0 | 5  | 0 | 0 | 0.6006303 |



|     |                                                                                                   |    |   |    |   |    |   |   |           |
|-----|---------------------------------------------------------------------------------------------------|----|---|----|---|----|---|---|-----------|
| 152 | Galb1-4GlcNAcb1-3Galb1-4(Fuca1-3)GlcNAcb1-3Galb1-4(Fuca1-3)GlcNAcb-Sp0                            | 13 | 0 | 13 | 0 | 16 | 0 | 0 | 0.6018836 |
| 66  | Fuca1-2Galb1-4(Fuca1-3)GlcNAcb1-3Galb1-4(Fuca1-3)GlcNAcb-Sp0                                      | 55 | 0 | 38 | 0 | 5  | 0 | 0 | 0.5997562 |
| 419 | Fuca1-2Galb1-3GlcNAcb1-3GalNAc-Sp14                                                               | 13 | 0 | 26 | 0 | 13 | 0 | 0 | 0.6015039 |
| 61  | Fuca1-2Galb1-3GalNAcb1-4(Neu5Aca2-3)Galb1-4Glc-Sp9                                                | 15 | 0 | 18 | 0 | 14 | 0 | 0 | 0.6016937 |
| 344 | Galb1-4GlcNAcb1-2Mana1-3Manb1-4GlcNAcb1-4GlcNAc-Sp12                                              | 25 | 0 | 33 | 0 | 9  | 0 | 0 | 0.6009342 |
| 130 | Galb1-3(Neu5Aca2-6)GlcNAcb1-4Galb1-4Glc-Sp10                                                      | 33 | 0 | 48 | 0 | 4  | 0 | 0 | 0.6002503 |
| 37  | [4OSO3]Galb1-4GlcNAcb-Sp8                                                                         | 12 | 0 | 7  | 0 | 17 | 0 | 0 | 0.6021113 |
| 40  | [6OSO3]Galb1-4Glc-Sp8                                                                             | 26 | 0 | 34 | 0 | 8  | 0 | 0 | 0.6008962 |
| 393 | Galb1-4GlcNAcb1-2Mana1-3(GlcNAcb1-2Mana1-6)Manb1-4GlcNAcb1-4GlcNAc-Sp12                           | 40 | 0 | 25 | 0 | 9  | 0 | 0 | 0.6006683 |
| 269 | Neu5Gca2-3Galb1-3(Fuca1-4)GlcNAcb-Sp0                                                             | 33 | 0 | 46 | 0 | 4  | 0 | 0 | 0.6003263 |
| 18  | Galb1-4GlcNAcb1-3(Galb1-4GlcNAcb1-6)GalNAca-Sp8                                                   | 36 | 0 | 22 | 0 | 10 | 0 | 0 | 0.6008962 |
| 65  | Fuca1-2Galb1-3GlcNAcb-Sp8                                                                         | 24 | 0 | 16 | 0 | 13 | 0 | 0 | 0.6014659 |
| 13  | Manb-Sp8                                                                                          | 22 | 0 | 27 | 0 | 9  | 0 | 0 | 0.6012761 |
| 255 | Neu5Aca2-6GalNAcb1-4GlcNAcb-Sp0                                                                   | 14 | 0 | 8  | 0 | 15 | 0 | 0 | 0.6020733 |
| 81  | [3OSO3]Galb1-4(Fuca1-3)Glc-Sp0                                                                    | 12 | 0 | 18 | 0 | 12 | 0 | 0 | 0.6018836 |
| 365 | Galb1-4GlcNAcb1-2(Galb1-4GlcNAcb1-4)Mana1-3(Galb1-4GlcNAcb1-2Mana1-6)Manb1-4GlcNAcb1-4GlcNAc-Sp21 | 21 | 0 | 28 | 0 | 8  | 0 | 0 | 0.601314  |
| 175 | GlcNAcb1-3Galb1-4Glc-Sp0                                                                          | 22 | 0 | 22 | 0 | 10 | 0 | 0 | 0.601428  |
| 117 | Gala1-6Glc-Sp8                                                                                    | 41 | 0 | 61 | 0 | -3 | 0 | 0 | 0.5997182 |
| 107 | Gala1-3Galb1-4(Fuca1-3)GlcNAcb-Sp8                                                                | 22 | 0 | 16 | 0 | 11 | 0 | 0 | 0.6016178 |
| 71  | Fuca1-2Galb1-4GlcNAcb1-3Galb1-4GlcNAcb1-3Galb1-4GlcNAcb-Sp0                                       | 25 | 0 | 25 | 0 | 7  | 0 | 0 | 0.601314  |
| 223 | Neu5Aca2-3(GalNAcb1-4)Galb1-4Glc-Sp0                                                              | 51 | 0 | 19 | 0 | 7  | 0 | 0 | 0.6005543 |
| 171 | GlcNAcb1-3Galb-Sp8                                                                                | 34 | 0 | 38 | 0 | 2  | 0 | 0 | 0.6006683 |
| 170 | GlcNAcb1-3GalNAca-Sp14                                                                            | 25 | 0 | 18 | 0 | 8  | 0 | 0 | 0.6015419 |
| 379 | Galb1-3GlcNAcb1-3(Galb1-4(Fuca1-3)GlcNAcb1-6)Galb1-4Glc-Sp21                                      | 28 | 0 | 29 | 0 | 5  | 0 | 0 | 0.6011241 |
| 293 | Galb1-4GlcNAcb1-3(Galb1-4GlcNAcb1-6)Galb1-4GlcNAc-Sp0                                             | 23 | 0 | 31 | 0 | 4  | 0 | 0 | 0.6012761 |
| 177 | GlcNAcb1-4(GlcNAcb1-6)GalNAca-Sp8                                                                 | 13 | 0 | 36 | 0 | 4  | 0 | 0 | 0.6014659 |
| 38  | 6-H2PO3Mana-Sp8                                                                                   | 18 | 0 | 20 | 0 | 7  | 0 | 0 | 0.6017697 |
| 46  | Neu5Ac(9Ac)a2-6Galb1-4GlcNAcb-Sp8                                                                 | 24 | 0 | 35 | 0 | 2  | 0 | 0 | 0.6011621 |
| 14  | GalNAcb-Sp8                                                                                       | 16 | 0 | 20 | 0 | 7  | 0 | 0 | 0.6018456 |
| 39  | [6OSO3]Galb1-4Glc-Sp0                                                                             | 30 | 0 | 16 | 0 | 7  | 0 | 0 | 0.6014659 |
| 174 | GlcNAcb1-3Galb1-4GlcNAcb1-3Galb1-4GlcNAcb-Sp0                                                     | 29 | 0 | 34 | 0 | 2  | 0 | 0 | 0.6010102 |
| 249 | Neu5Aca2-3Galb1-4GlcNAcb-Sp8                                                                      | 32 | 0 | 15 | 0 | 6  | 0 | 0 | 0.6014659 |
| 437 | Neu5Aca2-3Galb1-4GlcNAcb1-3Galb-Sp8                                                               | 10 | 0 | 12 | 0 | 9  | 0 | 0 | 0.6023011 |
| 106 | Gala1-3GalNAcb-Sp8                                                                                | 20 | 0 | 41 | 0 | -1 | 0 | 0 | 0.6012001 |
| 296 | Galb1-4GlcNAcb1-6Galb1-4GlcNAcb-Sp0                                                               | 41 | 0 | 26 | 0 | 1  | 0 | 0 | 0.6008962 |
| 155 | Galb1-4GlcNAcb1-3Galb1-4Glc-Sp0                                                                   | 18 | 0 | 13 | 0 | 7  | 0 | 0 | 0.6020354 |
| 55  | Fuca1-2Galb1-3GalNAcb1-3Gala-Sp9                                                                  | 16 | 0 | 40 | 0 | -1 | 0 | 0 | 0.60139   |
| 157 | Galb1-4GlcNAcb1-6(Galb1-3)GalNAca-Sp8                                                             | 11 | 0 | 1  | 0 | 10 | 0 | 0 | 0.6026426 |

| Spacer Abbreviation | Chemical Structure                                                                              |
|---------------------|-------------------------------------------------------------------------------------------------|
| Sp0                 | CH <sub>2</sub> CH <sub>2</sub> NH <sub>2</sub>                                                 |
| Sp8                 | CH <sub>2</sub> CH <sub>2</sub> CH <sub>2</sub> NH <sub>2</sub>                                 |
| Sp9                 | CH <sub>2</sub> CH <sub>2</sub> CH <sub>2</sub> CH <sub>2</sub> CH <sub>2</sub> NH <sub>2</sub> |
| Sp10                | NHCOCH <sub>2</sub> NH                                                                          |
| Sp11                | OCH <sub>2</sub> C <sub>6</sub> H <sub>4</sub> -p-NHCOCH <sub>2</sub> NH                        |
| Sp12                | Asparagine                                                                                      |
| Sp13                | Glycine                                                                                         |
| Sp14                | Threonine                                                                                       |
| Sp15                | Serine                                                                                          |
| Sp16                | PNP (OC <sub>6</sub> H <sub>4</sub> NH <sub>2</sub> )                                           |
| Sp17                | OCH <sub>2</sub> C <sub>6</sub> H <sub>4</sub> NH <sub>2</sub>                                  |
| Sp18                | O(CH <sub>2</sub> ) <sub>3</sub> NHCO(CH <sub>2</sub> ) <sub>3</sub> NH <sub>2</sub>            |
| Sp19                | EN or NK                                                                                        |
| Sp20                | GENR                                                                                            |
| Sp21                | N(CH <sub>3</sub> )-O-(CH <sub>2</sub> ) <sub>2</sub> -NH <sub>2</sub>                          |
| Sp22                | NST                                                                                             |

MDPLys

Mur-L-Ala-D-iGlnb-(CH<sub>2</sub>)<sub>4</sub>NH<sub>2</sub>
