# Supplementary material
Source: PubMed Central journal article supplement (PMC3459425)
Supplement: Supp_Table4a.pdf [file Supp_Table4a.pdf]

**Supplementary Table 4a Biotinylated Con A at 0.01, and 0.001 µg/ml binding to v4.0 of the CFG glycan array detected with Cy5-labeled Streptavidin and sorted according to Rank based on percent of maximum RFU.**

anomeric configuration of monosaccharides indicated as α and β, highlighted structures defined as binding glycans by z-score with p-values <0.15

| Chart Number | Structure                                                                                                       | Maximum RFU | Con A 0.01 µg/ml<br>26599 |      | Con A 0.001 µg/ml<br>2989 |      | AVG. RANK | p value   |
|--------------|-----------------------------------------------------------------------------------------------------------------|-------------|---------------------------|------|---------------------------|------|-----------|-----------|
|              |                                                                                                                 |             | RFU                       | RANK | RFU                       | RANK |           |           |
| 206          | Mana1-6(Mana1-3)Mana1-6[Mana1-2Mana1-3]Manb1-4GlcNAcb1-4GlcNAcb-Sp12                                            |             | 25552                     | 96   | 2989                      | 100  | 98        | 1.05E-10  |
| 199          | Mana1-2Mana1-3(Mana1-2Mana1-6)Mana-Sp9                                                                          |             | 23490                     | 88   | 2857                      | 96   | 92        | 2.56E-09  |
| 309          | Mana1-2Mana1-2Mana1-3(Mana1-2Mana1-6(Mana1-2Mana1-3)Mana1-6)Mana-Sp9                                            |             | 22295                     | 84   | 2786                      | 93   | 89        | 1.44E-08  |
| 204          | Mana1-3(Mana1-6)Mana-Sp9                                                                                        |             | 26599                     | 100  | 2274                      | 76   | 88        | 6.34E-11  |
| 202          | Mana1-2Mana1-6(Mana1-3)Mana1-6[Mana1-2Mana1-2Mana1-3]Manb1-4GlcNAcb1-4GlcNAcb-Sp12                              |             | 23567                     | 89   | 2245                      | 75   | 82        | 5.36E-09  |
| 308          | Mana1-2Mana1-2Mana1-3(Mana1-2Mana1-6(Mana1-3)Mana1-6)Mana-Sp9                                                   |             | 19646                     | 74   | 2510                      | 84   | 79        | 5.63E-07  |
| 205          | Mana1-3(Mana1-2Mana1-2Mana1-6)Mana-Sp9                                                                          |             | 24990                     | 94   | 1836                      | 61   | 78        | 1.30E-09  |
| 201          | Mana1-6[Mana1-2Mana1-3]Mana1-6[Mana1-2Mana1-3]Manb1-4GlcNAcb1-4GlcNAcb-Sp12                                     |             | 23313                     | 88   | 1993                      | 67   | 77        | 1.06E-08  |
| 307          | Mana1-6(Mana1-3)Mana1-6(Mana1-3)Manb-Sp10                                                                       |             | 20309                     | 76   | 2105                      | 70   | 73        | 4.15E-07  |
| 207          | Mana1-6(Mana1-3)Mana1-6(Mana1-3)Manb1-4GlcNAcb1-4 GlcNAcb-Sp12                                                  |             | 22076                     | 83   | 1686                      | 56   | 70        | 7.94E-08  |
| 48           | Mana1-3(Mana1-6)Manb1-4GlcNAcb1-4GlcNAcb-Sp13                                                                   |             | 20824                     | 78   | 1600                      | 54   | 66        | 4.10E-07  |
| 200          | Mana1-2Mana1-3Mana-Sp9                                                                                          |             | 16160                     | 61   | 1639                      | 55   | 58        | 5.79E-05  |
| 47           | Mana1-3(Mana1-6)Manb1-4GlcNAcb1-4GlcNAcb-Sp12                                                                   |             | 16941                     | 64   | 1254                      | 42   | 53        | 3.96E-05  |
| 203          | Mana1-2Mana1-2Mana1-3(Mana1-2Mana1-3(Mana1-2Mana1-6)Mana1-6)Manb1-4GlcNAcb1-4GlcNAcb-Sp12                       |             | 12290                     | 46   | 1381                      | 46   | 46        | 0.0018984 |
| 198          | Mana1-2Mana1-2Mana1-3Mana-Sp9                                                                                   |             | 13421                     | 50   | 1247                      | 42   | 46        | 0.0008845 |
| 346          | Galb1-4GlcNAcb1-2Mana1-3(Mana1-6)Manb1-4GlcNAcb1-4GlcNAcb-Sp12                                                  |             | 10072                     | 38   | 926                       | 31   | 34        | 0.0115203 |
| 341          | Neu5Aca2-6Galb1-4GlcNAcb1-2Mana1-3(Mana1-6)Manb1-4GlcNAcb1-4GlcNAcb-Sp12                                        |             | 11144                     | 42   | 786                       | 26   | 34        | 6.39E-03  |
| 360          | Mana1-3(Galb1-4GlcNAcb1-2Mana1-6)Manb1-4GlcNAcb1-4GlcNAcb-Sp12                                                  |             | 7696                      | 29   | 694                       | 23   | 26        | 0.0478491 |
| 340          | Mana1-3(Neu5Aca2-6Galb1-4GlcNAcb1-2Mana1-6)Manb1-4GlcNAcb1-4GlcNAcb-Sp12                                        |             | 7312                      | 27   | 390                       | 13   | 20        | 0.0660296 |
| 319          | Galb1-3GlcNAcb1-2Mana1-3(Galb1-3GlcNAcb1-2Mana1-6)Manb1-4GlcNAcb1-4GlcNAcb-Sp19                                 |             | 5167                      | 19   | 630                       | 21   | 20        | 0.1439176 |
| 388          | Neu5Aca2-3(GalNAcb1-4)Galb1-4GlcNAcb1-3GalNAca-Sp14                                                             |             | 2468                      | 9    | 914                       | 31   | 20        | 0.3081518 |
| 49           | GlcNAcb1-2Mana1-3(GlcNAcb1-2Mana1-6)Manb1-4GlcNAcb1-4GlcNAcb-Sp13                                               |             | 5961                      | 22   | 384                       | 13   | 18        | 0.1169523 |
| 349          | Galb1-3GlcNAcb1-2Mana1-3(Galb1-3GlcNAcb1-2Mana1-6)Manb1-4GlcNAcb1-4GlcNAcb-Sp22                                 |             | 3576                      | 13   | 639                       | 21   | 17        | 0.2435678 |
| 315          | Neu5Aca2-6Galb1-4GlcNAcb1-2Mana1-3(GlcNAcb1-2Mana1-6)Manb1-4GlcNAcb1-4GlcNAcb-Sp12                              |             | 5136                      | 19   | 302                       | 10   | 15        | 1.64E-01  |
| 393          | Galb1-4GlcNAcb1-2Mana1-3(GlcNAcb1-2Mana1-6)Manb1-4GlcNAcb1-4GlcNAcb-Sp12                                        |             | 4106                      | 15   | 348                       | 12   | 14        | 0.2264862 |
| 399          | Gala1-4Galb1-3GlcNAcb1-2Mana1-3(Gala1-4Galb1-3GlcNAcb1-2Mana1-6)Manb1-4GlcNAcb1-4GlcNAcb-Sp19                   |             | 4832                      | 18   | 258                       | 9    | 13        | 0.1844815 |
| 361          | Galb1-3(Fuca1-4)GlcNAcb1-2Mana1-3(Galb1-3(Fuca1-4)GlcNAcb1-2Mana1-6)Manb1-4GlcNAcb1-4(Fuca1-6)GlcNAcb-Sp22      |             | 3841                      | 14   | 307                       | 10   | 12        | 0.2484784 |
| 347          | GlcNAcb1-2Mana1-3(GlcNAcb1-2Mana1-6)Manb1-4GlcNAcb1-4(Fuca1-6)GlcNAcb-Sp22                                      |             | 3812                      | 14   | 278                       | 9    | 12        | 0.2527715 |
| 193          | GlcAb-Sp8                                                                                                       |             | 1707                      | 6    | 506                       | 17   | 12        | 0.4093728 |
| 216          | Neu5Aca2-8Neu5Aca2-8Neu5Aca2-3(GalNAcb1-4)Galb1-4Glc-Sp0                                                        |             | 860                       | 3    | 466                       | 16   | 9         | 0.4908964 |
| 359          | Gala1-3Galb1-4GlcNAcb1-2Mana1-3(Gala1-3Galb1-4GlcNAcb1-2Mana1-6)Manb1-4GlcNAcb1-4GlcNAcb-Sp20                   |             | 2931                      | 11   | 200                       | 7    | 9         | 0.3289887 |
| 321          | Neu5Aca2-6Galb1-4GlcNAcb1-2Mana1-3(Neu5Aca2-3Galb1-4GlcNAcb1-2Mana1-6)Manb1-4GlcNAcb1-4GlcNAcb-Sp12             |             | 1649                      | 6    | 334                       | 11   | 9         | 0.4302824 |
| 299          | GlcAb1-3GlcNAcb-Sp8                                                                                             |             | 632                       | 2    | 448                       | 15   | 9         | 0.5137226 |
| 331          | GalNAca1-3(Fuca1-2)Galb1-4GlcNAcb1-3Galb1-4GlcNAcb1-3Galb1-4GlcNAcb-Sp0                                         |             | 886                       | 3    | 412                       | 14   | 9         | 0.4934944 |
| 348          | Galb1-4GlcNAcb1-2Mana1-3(Galb1-4GlcNAcb1-2Mana1-6)Manb1-4GlcNAcb1-4(Fuca1-6)GlcNAcb-Sp22                        |             | 2201                      | 8    | 221                       | 7    | 8         | 0.3905917 |
| 394          | GlcNAcb1-2Mana1-3(Galb1-4GlcNAcb1-2Mana1-6)Manb1-4GlcNAcb1-4GlcNAcb-Sp12                                        |             | 2998                      | 11   | 104                       | 3    | 7         | 0.3314324 |
| 413          | Fuca1-2Galb1-4(Fuca1-3)GlcNAcb1-3GalNAca-Sp14                                                                   |             | 570                       | 2    | 326                       | 11   | 7         | 0.5307705 |
| 314          | Neu5Aca2-6Galb1-4GlcNAcb1-2Mana1-3(Galb1-4GlcNAcb1-2Mana1-6)Manb1-4GlcNAcb1-4GlcNAcb-Sp12                       |             | 2033                      | 8    | 151                       | 5    | 6         | 4.12E-01  |
| 301          | GlcNAcb1-2Mana1-3(GlcNAcb1-2Mana1-6)Manb1-4GlcNAcb1-4GlcNAcb-Sp12                                               |             | 1841                      | 7    | 170                       | 6    | 6         | 0.4277252 |
| 391          | Gala1-3Galb1-3(Fuca1-4)GlcNAcb1-2Mana1-3(Gala1-3Galb1-3(Fuca1-4)GlcNAcb1-2Mana1-6)Manb1-4GlcNAcb1-4GlcNAcb-Sp19 |             | 1806                      | 7    | 172                       | 6    | 6         | 0.4307394 |
| 311          | Neu5Aca2-3Galb1-3(Neu5Aca2-6)GalNAca-Sp14                                                                       |             | 1695                      | 6    | 155                       | 5    | 6         | 0.4424674 |
| 428          | GlcNAcb1-2Mana1-3(GlcNAcb1-4)(GlcNAcb1-2Mana1-6)Manb1-4GlcNAcb1-4GlcNAcb-Sp21                                   |             | 1828                      | 7    | 136                       | 5    | 6         | 0.4320193 |
| 228          | Neu5Aca2-3Galb1-3[6OSO3]GlcNAcb-Sp8                                                                             |             | 909                       | 3    | 228                       | 8    | 6         | 0.5084348 |
| 350          | Galb1-3(Fuca1-4)GlcNAcb1-2Mana1-3(Galb1-3(Fuca1-4)GlcNAcb1-2Mana1-6)Manb1-4GlcNAcb1-4GlcNAcb-Sp19               |             | 1814                      | 7    | 120                       | 4    | 5         | 0.4347645 |
| 320          | Neu5Aca2-3Galb1-4GlcNAcb1-2Mana1-3(Neu5Aca2-3Galb1-4GlcNAcb1-2Mana1-6)Manb1-4GlcNAcb1-4GlcNAcb-Sp12             |             | 1082                      | 4    | 193                       | 6    | 5         | 0.4956287 |
| 282          | Galb1-4(Fuca1-3)GlcNAcb1-3Galb1-3(Fuca1-4)GlcNAcb-Sp0                                                           |             | 489                       | 2    | 258                       | 9    | 5         | 0.5445359 |
| 323          | Neu5Ac(9Ac)a2-3Galb1-4GlcNAcb-Sp0                                                                               |             | 859                       | 3    | 216                       | 7    | 5         | 0.5141863 |

|     |                                                                                                                          |      |   |     |   |   |           |
|-----|--------------------------------------------------------------------------------------------------------------------------|------|---|-----|---|---|-----------|
| 128 | Galb1-3(Neu5Aca2-6)GalNAca-Sp14                                                                                          | 618  | 2 | 238 | 8 | 5 | 0.5344702 |
| 383 | Galb1-4GlcNacb1-2(Galb1-4GlcNacb1-4)Mana1-3(Galb1-4GlcNacb1-2(Galb1-4GlcNacb1-6)Mana1-6)Manb1-4GlcNacb1-4GlcNacb-Sp21    | 1695 | 6 | 117 | 4 | 5 | 0.4459594 |
| 51  | Neu5Aca2-6Galb1-4GlcNacb1-2Mana1-3(Neu5Aca2-6Galb1-4GlcNacb1-2Mana1-6)Manb1-4GlcNacb1-4GlcNacb-N(LT)AVL                  | 1220 | 5 | 166 | 6 | 5 | 4.85E-01  |
| 99  | Gala1-3(Fuca1-2)Galb1-4(Fuca1-3)GlcNacb-Sp0                                                                              | 432  | 2 | 251 | 8 | 5 | 0.5504332 |
| 371 | Fuca1-2Galb1-3(Fuca1-4)GlcNacb1-2Mana1-3(Fuca1-2Galb1-3(Fuca1-4)GlcNacb1-2Mana1-6)Manb1-4GlcNacb1-4GlcNacb-Sp19          | 456  | 2 | 239 | 8 | 5 | 0.5493282 |
| 427 | Galb1-4GlcNacb1-3Galb1-4(Fuca1-3GlcNacb1-6)Galb1-4Glc-Sp21                                                               | 612  | 2 | 218 | 7 | 5 | 0.5368735 |
| 390 | Galb1-3Galb1-3GlcNacb1-2Mana1-3(Gala1-3Galb1-3GlcNacb1-2Mana1-6)Manb1-4GlcNacb1-4GlcNacb-Sp19                            | 980  | 4 | 174 | 6 | 5 | 0.5068575 |
| 52  | Neu5Aca2-6Galb1-4GlcNacb1-2Mana1-3(Neu5Aca2-6Galb1-4GlcNacb1-2Mana1-6)Manb1-4GlcNacb1-4GlcNacb-Sp8                       | 1422 | 5 | 120 | 4 | 5 | 4.71E-01  |
| 80  | GalNAca1-3(Fuca1-2)Galb1-4(Fuca1-3)GlcNacb-Sp0                                                                           | 585  | 2 | 207 | 7 | 5 | 0.5403835 |
| 337 | GlcNAca1-4Galb1-4GlcNacb1-3Galb1-4(Fuca1-3)GlcNacb1-3Galb1-4(Fuca1-3)GlcNacb-Sp0                                         | 1378 | 5 | 116 | 4 | 5 | 0.4753204 |
| 105 | Gala1-3GalNAca-Sp16                                                                                                      | 936  | 4 | 161 | 5 | 4 | 0.5121457 |
| 300 | GlcNacb1-2Mana1-3(Neu5Aca2-6Galb1-4GlcNacb1-2Mana1-6)Manb1-4GlcNacb1-4GlcNacb-Sp12                                       | 1143 | 4 | 137 | 5 | 4 | 0.4951647 |
| 23  | [3OSO3]Galb1-4Glc-Sp8                                                                                                    | 465  | 2 | 209 | 7 | 4 | 0.5512616 |
| 423 | Fuca1-2Galb1-3GlcNacb1-2Mana1-3(Fuca1-2Galb1-3GlcNacb1-2Mana1-6)Manb1-4GlcNacb1-4(Fuca1-6)GlcNacb-Sp22                   | 1169 | 4 | 126 | 4 | 4 | 0.4937728 |
| 400 | Gala1-4Galb1-4GlcNacb1-2Mana1-3(Gala1-4Galb1-4GlcNacb1-2Mana1-6)Manb1-4GlcNacb1-4GlcNacb-LVaNKT                          | 1370 | 5 | 103 | 3 | 4 | 0.4772658 |
| 181 | GlcNacb1-4GlcNacb1-4GlcNacb-Sp8                                                                                          | 490  | 2 | 191 | 6 | 4 | 0.5506173 |
| 374 | Neu5Aca2-3Galb1-4(Fuca1-3)GlcNacb1-3GalNAca-Sp14                                                                         | 292  | 1 | 205 | 7 | 4 | 0.5675043 |
| 50  | Galb1-4GlcNacb1-2Mana1-3(Galb1-4GlcNacb1-2Mana1-6)Manb1-4GlcNacb1-4GlcNacb-Sp12                                          | 1434 | 5 | 74  | 2 | 4 | 0.4740237 |
| 424 | Gala1-3(Fuca1-2)Galb1-4GlcNacb1-2Mana1-3(Gala1-3(Fuca1-2)Galb1-4GlcNacb1-2Mana1-6)Manb1-4GlcNacb1-4(Fuca1-6)GlcNacb-Sp22 | 1165 | 4 | 103 | 3 | 4 | 0.4962783 |
| 235 | Neu5Aca2-3Galb1-3GalNAcb1-3Gala1-4Galb1-4Glc-Sp0                                                                         | 462  | 2 | 161 | 5 | 4 | 0.5559518 |
| 87  | GalNAca1-3(Fuca1-2)Galb-Sp18                                                                                             | 361  | 1 | 172 | 6 | 4 | 0.564209  |
| 395 | Neu5Aca2-3Galb1-3GlcNacb1-3GalNAca-Sp14                                                                                  | 467  | 2 | 158 | 5 | 4 | 0.555768  |
| 54  | Neu5Aca2-6Galb1-4GlcNacb1-2Mana1-3(Neu5Aca2-6Galb1-4GlcNacb1-2Mana1-6)Manb1-4GlcNacb1-4GlcNacb-Sp13                      | 1202 | 5 | 65  | 2 | 3 | 4.96E-01  |
| 370 | Gala1-3(Fuca1-2)Galb1-3GlcNacb1-2Mana1-3(Gala1-3(Fuca1-2)Galb1-3GlcNacb1-2Mana1-6)Manb1-4GlcNacb1-4GlcNacb-Sp20          | 703  | 3 | 120 | 4 | 3 | 0.5375203 |
| 392 | Neu5Aca2-3Galb1-3GlcNacb1-2Mana1-3(Neu5Aca2-3Galb1-3GlcNacb1-2Mana1-6)Manb1-4GlcNacb1-4GlcNacb-Sp19                      | 1652 | 6 | 12  | 0 | 3 | 0.4595973 |
| 358 | Fuca1-2Galb1-4(Fuca1-3)GlcNacb1-2Mana1-3(Fuca1-2Galb1-4(Fuca1-3)GlcNacb1-2Mana1-6)Manb1-4GlcNacb1-4GlcNab-Sp20           | 288  | 1 | 162 | 5 | 3 | 0.5717994 |
| 415 | GalNAca1-3(Fuca1-2)Galb1-4(Fuca1-3)GlcNacb1-3GalNAc-Sp14                                                                 | 170  | 1 | 175 | 6 | 3 | 0.5813634 |
| 20  | [3OSO3][6OSO3]Galb1-4[6OSO3]GlcNacb-Sp0                                                                                  | 273  | 1 | 163 | 5 | 3 | 0.5730772 |
| 356 | Fuca1-2Galb1-3GlcNacb1-2Mana1-3(Fuca1-2Galb1-3GlcNacb1-2Mana1-6)Manb1-4GlcNacb1-4GlcNacb-Sp20                            | 815  | 3 | 97  | 3 | 3 | 0.5292899 |
| 7   | Rha-Sp8                                                                                                                  | 569  | 2 | 118 | 4 | 3 | 0.5500649 |
| 396 | Fuca1-2Galb1-4GlcNacb1-3GalNAca-Sp14                                                                                     | 141  | 1 | 163 | 5 | 3 | 0.5850853 |
| 351 | [6OSO3]GlcNacb1-3Gal b1-4GlcNac-b-Sp0                                                                                    | 191  | 1 | 155 | 5 | 3 | 0.5812726 |
| 375 | (GalNAcb1-4GlcNacb1-2Mana1-6)GalNAcb1-4GlcNacb1-2Mana1-3Manb1-4GlcNacb1-4GlcNac-Sp12                                     | 457  | 2 | 125 | 4 | 3 | 0.5597166 |
| 292 | Galb1-4GlcNacb1-2Mana1-3(Neu5Aca2-6Galb1-4GlcNacb1-2Mana1-6)Manb1-4GlcNacb1-4GlcNacb-Sp12                                | 1043 | 4 | 50  | 2 | 3 | 0.5125168 |
| 430 | GlcNacb1-2Mana1-3(GlcNacb1-4)(GlcNacb1-6)(GlcNacb1-2)Mana1-6)Manb1-4GlcNacb1-4GlcNac-Sp21                                | 549  | 2 | 103 | 3 | 3 | 0.5532857 |
| 365 | Galb1-4GlcNacb1-2(Galb1-4GlcNacb1-4)Mana1-3(Galb1-4GlcNacb1-2Mana1-6)Manb1-4GlcNacb1-4GlcNac-Sp21                        | 437  | 2 | 114 | 4 | 3 | 0.5625597 |
| 269 | Neu5Gca2-3Galb1-3(Fuca1-4)GlcNacb-Sp0                                                                                    | 338  | 1 | 124 | 4 | 3 | 0.5707036 |
| 221 | Neu5Aca2-3(GalNAcb1-4)Galb1-4GlcNacb-Sp0                                                                                 | 271  | 1 | 129 | 4 | 3 | 0.5763593 |
| 334 | GlcNAca1-4Galb1-4GlcNacb-Sp0                                                                                             | 250  | 1 | 131 | 4 | 3 | 0.5780894 |
| 155 | Galb1-4GlcNacb1-3Galb1-4Glc-Sp0                                                                                          | 307  | 1 | 123 | 4 | 3 | 0.5736246 |
| 107 | Gala1-3Galb1-4(Fuca1-3)GlcNacb-Sp8                                                                                       | 256  | 1 | 127 | 4 | 3 | 0.5779074 |
| 271 | Neu5Gca2-3Galb1-4(Fuca1-3)GlcNacb-Sp0                                                                                    | 150  | 1 | 139 | 5 | 3 | 0.586445  |
| 322 | Fuca1-3(Galb1-4)GlcNacb1-2Mana1-3(Fuca1-3(Galb1-4)GlcNacb1-2Mana1-6)Manb1-4GlcNacb1-4GlcNacb-Sp20                        | 580  | 2 | 90  | 3 | 3 | 0.5516297 |
| 384 | GlcNacb1-2(GlcNacb1-4)Mana1-3(GlcNacb1-2Mana1-6)Manb1-4GlcNacb1-4GlcNac-Sp21                                             | 593  | 2 | 87  | 3 | 3 | 0.5507093 |
| 43  | Neu5Aca2-3[6OSO3]Galb1-4GlcNacb-Sp8                                                                                      | 211  | 1 | 128 | 4 | 3 | 0.5819085 |
| 150 | Galb1-4GlcNacb1-3GalNAca-Sp8                                                                                             | 443  | 2 | 102 | 3 | 3 | 0.5631096 |
| 30  | [3OSO3]Galb1-4(Fuca1-3)GlcNacb-Sp8                                                                                       | 209  | 1 | 126 | 4 | 3 | 0.5822719 |
| 179 | (GlcNacb1-4)6b-Sp8                                                                                                       | 240  | 1 | 121 | 4 | 2 | 0.579909  |
| 273 | Neu5Gca2-3Galb1-4Glc-Sp0                                                                                                 | 251  | 1 | 120 | 4 | 2 | 0.5789994 |
| 421 | GalNAca1-3(Fuca1-2)Galb1-3GlcNacb1-3GalNAc-Sp14                                                                          | 163  | 1 | 129 | 4 | 2 | 0.5861731 |
| 67  | Fuca1-2Galb1-4(Fuca1-3)GlcNacb1-3Galb1-4(Fuca1-3)GlcNacb1-3Galb1-4(Fuca1-3)GlcNacb-Sp0                                   | 264  | 1 | 118 | 4 | 2 | 0.5779984 |

|     |                                                                                                                                                 |     |   |     |   |   |           |
|-----|-------------------------------------------------------------------------------------------------------------------------------------------------|-----|---|-----|---|---|-----------|
| 303 | GlcNAcb1-4GlcNAcb-Sp10                                                                                                                          | 116 | 0 | 132 | 4 | 2 | 0.5901564 |
| 215 | Neu5Aca2-8Neu5Aca2-8Neu5Aca2-8Neu5Aca2-3(GalNAcb1-4)Galb1-4Glc-Sp0                                                                              | 499 | 2 | 88  | 3 | 2 | 0.5592578 |
| 98  | Gala1-3(Fuca1-2)Galb1-3GlcNAcb-Sp0                                                                                                              | 249 | 1 | 115 | 4 | 2 | 0.5796362 |
| 275 | Neu5Gca2-6Galb1-4GlcNAcb-Sp0                                                                                                                    | 194 | 1 | 119 | 4 | 2 | 0.5842689 |
| 367 | Gala1-3(Fuca1-2)Galb1-4GlcNAcb1-2Mana1-3(Gala1-3(Fuca1-2)Galb1-4GlcNAcb1-2Mana1-6)Manb1-4GlcNAcb1-4GlcNAcb-Sp20                                 | 532 | 2 | 80  | 3 | 2 | 0.5569624 |
| 397 | Galb1-4(Fuca1-3)GlcNAcb1-3GalNaca-Sp14                                                                                                          | 204 | 1 | 116 | 4 | 2 | 0.5836337 |
| 338 | GlcNAca1-4Galb1-4GlcNAcb1-3Galb1-4GlcNAcb-Sp0                                                                                                   | 144 | 1 | 122 | 4 | 2 | 0.588528  |
| 16  | GlcNAcb-Sp8                                                                                                                                     | 253 | 1 | 109 | 4 | 2 | 0.5798181 |
| 439 | [6OSO3]Galb1-3GlcNAcb-Sp0                                                                                                                       | 248 | 1 | 109 | 4 | 2 | 0.5802727 |
| 42  | [6OSO3]Galb1-4[6OSO3]Glc-Sp8                                                                                                                    | 185 | 1 | 114 | 4 | 2 | 0.5855386 |
| 253 | Neu5Aca2-3Galb1-4Glc-Sp8                                                                                                                        | 264 | 1 | 105 | 4 | 2 | 0.5791814 |
| 229 | Neu5Aca2-3Galb1-3(Fuca1-4)GlcNAcb-Sp8                                                                                                           | 313 | 1 | 98  | 3 | 2 | 0.575357  |
| 246 | Neu5Aca2-3Galb1-4(Fuca1-3)GlcNAcb1-3Galb1-4GlcNAcb-Sp8                                                                                          | 201 | 1 | 110 | 4 | 2 | 0.5844503 |
| 70  | Fuca1-2Galb1-4GlcNAcb1-3Galb1-4GlcNAcb-Sp0                                                                                                      | 152 | 1 | 115 | 4 | 2 | 0.5884374 |
| 22  | [3OSO3]Galb1-4(Fuca1-3)[6OSO3]Glc-Sp0                                                                                                           | 132 | 0 | 115 | 4 | 2 | 0.5902468 |
| 78  | Fucb1-3GlcNAcb-Sp8                                                                                                                              | 256 | 1 | 101 | 3 | 2 | 0.5802727 |
| 442 | Fuca1-2Galb1-4(Fuca1-3)GlcNAcb1-2(Fuca1-2Galb1-4(Fuca1-3)GlcNAcb1-4)Mana1-3(Fuca1-2Galb1-4(Fuca1-3)GlcNAcb1-2Mana1-6)Manb1-4GlcNAcb1-4GlcNAcb-N | 153 | 1 | 111 | 4 | 2 | 0.588709  |
| 369 | GalNAca1-3(Fuca1-2)Galb1-3GlcNAcb1-2Mana1-3(GalNAca1-3(Fuca1-2)Galb1-3GlcNAcb1-2Mana1-6)Manb1-4GlcNAcb1-4GlcNAcb-Sp20                           | 352 | 1 | 89  | 3 | 2 | 0.5726209 |
| 313 | Neu5Aca2-3Galb1-4GlcNAcb1-2Mana1-3(Neu5Aca2-6Galb1-4GlcNAcb1-2Mana1-6)Manb1-4GlcNAcb1-4GlcNAcb-Sp12                                             | 998 | 4 | 16  | 1 | 2 | 0.5198421 |
| 332 | (Neu5Aca2-3-Galb1-3)((Neu5Aca2-3-Galb1-4(Fuca1-3))GlcNAcb1-6)GalNAc-Sp14                                                                        | 106 | 0 | 116 | 4 | 2 | 0.5925057 |
| 53  | Neu5Aca2-6Galb1-4GlcNAcb1-2Mana1-3(Neu5Aca2-6Galb1-4GlcNAcb1-2Mana1-6)Manb1-4GlcNAcb1-4GlcNAcb-Sp12                                             | 884 | 3 | 28  | 1 | 2 | 0.5292899 |
| 158 | Galb1-3(Galb1-4GlcNAcb1-6)GalNAca-Sp8                                                                                                           | 186 | 1 | 105 | 4 | 2 | 0.5862638 |
| 183 | GlcNAcb1-6GalNAca-Sp8                                                                                                                           | 182 | 1 | 106 | 4 | 2 | 0.5865356 |
| 343 | Neu5Aca2-6Galb1-4GlcNAcb1-2Mana1-3Manb1-4GlcNAcb1-4GlcNAc-Sp12                                                                                  | 218 | 1 | 102 | 3 | 2 | 5.84E-01  |
| 222 | Neu5Aca2-3(GalNAcb1-4)Galb1-4GlcNAcb-Sp8                                                                                                        | 151 | 1 | 106 | 4 | 2 | 0.5893423 |
| 157 | Galb1-4GlcNAcb1-6(Galb1-3)GalNAca-Sp8                                                                                                           | 239 | 1 | 94  | 3 | 2 | 0.5824535 |
| 373 | Neu5Aca2-6Galb1-4GlcNAcb1-3GalNAc-Sp14                                                                                                          | 190 | 1 | 98  | 3 | 2 | 0.5865356 |
| 441 | Fuca1-2Galb1-4GlcNAcb1-2(Fuca1-2Galb1-4GlcNAcb1-4)Mana1-3(Fuca1-2Galb1-4 GlcNAcb1-2Mana1-6)Manb1-4GlcNAcb1-4GlcNAcb-N                           | 227 | 1 | 92  | 3 | 2 | 0.5837245 |
| 333 | GlcNAca1-4Galb1-4GlcNAcb1-3Galb1-4GlcNAcb1-3Galb1-4GlcNAcb-Sp0                                                                                  | 200 | 1 | 94  | 3 | 2 | 0.5859919 |
| 419 | Fuca1-2Galb1-3GlcNAcb1-3GalNAc-Sp14                                                                                                             | 170 | 1 | 97  | 3 | 2 | 0.5884374 |
| 133 | Galb1-3GalNAcb-Sp8                                                                                                                              | 233 | 1 | 90  | 3 | 2 | 0.5833614 |
| 90  | GalNAca1-4(Fuca1-2)Galb1-4GlcNAcb-Sp8                                                                                                           | 122 | 0 | 102 | 3 | 2 | 0.5923251 |
| 406 | Gala1-3(Fuca1-2)Galb1-4(Fuca1-3)Glc-Sp21                                                                                                        | 124 | 0 | 101 | 3 | 2 | 0.5922348 |
| 284 | Neu5Aca2-3Galb1-3GlcNAcb1-3Galb1-3GlcNAcb-Sp0                                                                                                   | 240 | 1 | 88  | 3 | 2 | 0.5829075 |
| 63  | Fuca1-2Galb1-3GlcNAcb1-3Galb1-4Glc-Sp10                                                                                                         | 406 | 2 | 67  | 2 | 2 | 0.5696986 |
| 46  | Neu5Ac(9Ac)a2-6Galb1-4GlcNAcb-Sp8                                                                                                               | 184 | 1 | 92  | 3 | 2 | 5.88E-01  |
| 422 | Gala1-3Galb1-3GlcNAcb1-3GalNAc-Sp14                                                                                                             | 143 | 1 | 95  | 3 | 2 | 0.5910603 |
| 39  | [6OSO3]Galb1-4Glc-Sp0                                                                                                                           | 199 | 1 | 89  | 3 | 2 | 0.5865356 |
| 418 | GlcNAcb1-2Mana1-3(GlcNAcb1-2(GlcNAcb1-6)Mana1-6)Manb1-4GlcNAcb1-4GlcNAcb-Sp19                                                                   | 425 | 2 | 63  | 2 | 2 | 0.5683274 |
| 18  | Galb1-4GlcNAcb1-3(Galb1-4GlcNAcb1-6)GalNAca-Sp8                                                                                                 | 206 | 1 | 83  | 3 | 2 | 0.586445  |
| 68  | Fuca1-2Galb1-4(Fuca1-3)GlcNAcb-Sp0                                                                                                              | 93  | 0 | 96  | 3 | 2 | 0.5954828 |
| 135 | Galb1-3GalNAcb1-4(Neu5Aca2-3)Galb1-4Glc-Sp0                                                                                                     | 152 | 1 | 89  | 3 | 2 | 0.5907892 |
| 109 | Gala1-3Galb1-4GlcNAcb-Sp8                                                                                                                       | 187 | 1 | 85  | 3 | 2 | 0.5879848 |
| 122 | Galb1-3(Fuca1-4)GlcNAc-Sp8                                                                                                                      | 188 | 1 | 84  | 3 | 2 | 0.5879848 |
| 146 | Galb1-4[6OSO3]Glc-Sp0                                                                                                                           | 287 | 1 | 72  | 2 | 2 | 0.5800909 |
| 306 | Mana1-6Manb-Sp10                                                                                                                                | 388 | 1 | 61  | 2 | 2 | 0.5718907 |
| 379 | Galb1-3GlcNAcb1-3(Galb1-4(Fuca1-3)GlcNAcb1-6)Galb1-4Glc-Sp21                                                                                    | 92  | 0 | 93  | 3 | 2 | 0.5958433 |
| 231 | Neu5Aca2-3Galb1-3(Neu5Aca2-3Galb1-4)GlcNAcb-Sp8                                                                                                 | 229 | 1 | 77  | 3 | 2 | 0.5849039 |
| 385 | Fuca1-2Galb1-3GalNAca1-3(Fuca1-2)Galb1-4Glc-Sp0                                                                                                 | 140 | 1 | 87  | 3 | 2 | 0.5920542 |
| 378 | Galb1-3GlcNAcb1-3(Galb1-3GlcNAcb1-3Galb1-4GlcNAcb1-6)Galb1-4Glc-Sp0                                                                             | 48  | 0 | 97  | 3 | 2 | 0.5994437 |
| 81  | [3OSO3]Galb1-4(Fuca1-3)Glc-Sp0                                                                                                                  | 304 | 1 | 67  | 2 | 2 | 0.5789994 |

|     |                                                                                                                       |     |   |    |   |   |           |
|-----|-----------------------------------------------------------------------------------------------------------------------|-----|---|----|---|---|-----------|
| 111 | Gala1-3Galb-Sp8                                                                                                       | 221 | 1 | 76 | 3 | 2 | 0.5857199 |
| 437 | Neu5Aca2-3Galb1-4GlcNAcb1-3Galb-Sp8                                                                                   | 263 | 1 | 71 | 2 | 2 | 0.5823627 |
| 153 | Galb1-4GlcNAcb1-3Galb1-4GlcNAcb1-3Galb1-4GlcNAcb-Sp0                                                                  | 278 | 1 | 69 | 2 | 2 | 0.5811817 |
| 24  | [3OSO3]Galb1-4[6OSO3]Glc-Sp0                                                                                          | 97  | 0 | 88 | 3 | 2 | 0.5958433 |
| 317 | Neu5Aca2-8Neu5Aca2-8Neu5Acb-Sp8                                                                                       | 111 | 0 | 85 | 3 | 2 | 0.5948518 |
| 65  | Fuca1-2Galb1-3GlcNAcb-Sp8                                                                                             | 306 | 1 | 63 | 2 | 2 | 0.5791814 |
| 295 | Galb1-4GlcNAca1-6Galb1-4GlcNAcb-Sp0                                                                                   | 151 | 1 | 80 | 3 | 2 | 0.5916929 |
| 363 | Neu5Aca2-6GlcNAcb1-4GlcNAcb1-4GlcNAc-Sp21                                                                             | 133 | 0 | 81 | 3 | 2 | 0.593228  |
| 258 | Neu5Aca2-6Galb1-4GlcNAcb-Sp8                                                                                          | 122 | 0 | 82 | 3 | 2 | 5.94E-01  |
| 382 | Galb1-3GlcNAcb1-3(Galb1-3GlcNAcb1-3Galb1-4(Fuca1-3)GlcNAcb1-6)Galb1-4Glc-Sp21                                         | 103 | 0 | 83 | 3 | 2 | 0.5957532 |
| 357 | Fuca1-2Galb1-4GlcNAcb1-2Mana1-3(Fuca1-2Galb1-4GlcNAcb1-2Mana1-6)Manb1-4GlcNAcb1-4GlcNAcb-Sp20                         | 552 | 2 | 32 | 1 | 2 | 0.5595331 |
| 255 | Neu5Aca2-6GalNAcb1-4GlcNAcb-Sp0                                                                                       | 237 | 1 | 67 | 2 | 2 | 0.5850853 |
| 380 | Fuca1-2Galb1-3(Fuca1-4)GlcNAcb1-3(Galb1-4GlcNAcb1-6)Galb1-4Glc-Sp21                                                   | 383 | 1 | 50 | 2 | 2 | 0.5733509 |
| 345 | Galb1-4GlcNAcb1-2Mana1-6Manb1-4GlcNAcb1-4GlcNAc-Sp12                                                                  | 150 | 1 | 75 | 3 | 2 | 0.5922348 |
| 251 | Fuca1-2Galb1-4[6OSO3]Glc-Sp0                                                                                          | 67  | 0 | 84 | 3 | 2 | 0.5989042 |
| 245 | Neu5Aca2-3Galb1-4(Fuca1-3)GlcNAcb1-3Galb-Sp8                                                                          | 107 | 0 | 79 | 3 | 2 | 0.5957532 |
| 164 | GlcNAca1-3Galb1-4GlcNAcb-Sp8                                                                                          | 169 | 1 | 72 | 2 | 2 | 0.5907892 |
| 131 | Galb1-3GalNAca-Sp8                                                                                                    | 263 | 1 | 61 | 2 | 2 | 0.5832707 |
| 126 | Galb1-3(GlcNAcb1-6)GalNAc-Sp14                                                                                        | 177 | 1 | 71 | 2 | 2 | 0.5901564 |
| 102 | Gala1-3(Fuca1-2)Galb-Sp8                                                                                              | 62  | 0 | 83 | 3 | 2 | 0.5994437 |
| 83  | GalNAca1-3(Fuca1-2)Galb1-4GlcNAcb-Sp8                                                                                 | 220 | 1 | 65 | 2 | 2 | 0.5868074 |
| 69  | Fuca1-2Galb1-4(Fuca1-3)GlcNAcb-Sp8                                                                                    | 214 | 1 | 66 | 2 | 2 | 0.5872604 |
| 197 | KDNa2-3Galb1-4GlcNAcb-Sp0                                                                                             | 139 | 1 | 74 | 2 | 1 | 0.5933182 |
| 129 | Galb1-3(Neu5Acb2-6)GalNAca-Sp8                                                                                        | 290 | 1 | 56 | 2 | 1 | 0.5812726 |
| 96  | GalNAcb1-4GlcNAcb-Sp8                                                                                                 | 85  | 0 | 78 | 3 | 1 | 0.5978246 |
| 180 | (GlcNAcb1-4)5b-Sp8                                                                                                    | 201 | 1 | 65 | 2 | 1 | 0.588528  |
| 412 | GalNAca1-3GalNAcb1-3Gala1-4Galb1-4Glc-Sp0                                                                             | 199 | 1 | 65 | 2 | 1 | 0.588709  |
| 425 | Galb1-3GlcNAcb1-2Mana1-3(Galb1-3GlcNAcb1-2(Galb1-3GlcNAcb1-6)Mana1-6)Manb1-4GlcNAcb1-4GlcNAcb-Sp19                    | 660 | 2 | 13 | 0 | 1 | 0.5513536 |
| 279 | Galb1-3GlcNAcb1-3Galb1-3GlcNAcb-Sp0                                                                                   | 117 | 0 | 74 | 2 | 1 | 0.5953026 |
| 41  | [6OSO3]Galb1-4GlcNAcb-Sp8                                                                                             | 179 | 1 | 67 | 2 | 1 | 0.5903372 |
| 344 | Galb1-4GlcNAcb1-2Mana1-3Manb1-4GlcNAcb1-4GlcNAc-Sp12                                                                  | 96  | 0 | 76 | 3 | 1 | 0.5970144 |
| 293 | Galb1-4GlcNAcb1-3(Galb1-4GlcNAcb1-6)Galb1-4GlcNAc-Sp0                                                                 | 194 | 1 | 65 | 2 | 1 | 0.5891614 |
| 352 | KDNa2-3Galb1-4(Fuca1-3)GlcNAc-Sp0                                                                                     | 86  | 0 | 76 | 3 | 1 | 0.5979146 |
| 330 | GalNAca1-3(Fuca1-2)Galb1-4GlcNAcb1-3Galb1-4GlcNAcb-Sp0                                                                | 91  | 0 | 76 | 3 | 1 | 0.5974645 |
| 173 | GlcNAcb1-3Galb1-4GlcNAcb-Sp8                                                                                          | 60  | 0 | 78 | 3 | 1 | 0.6000729 |
| 106 | Gala1-3GalNAcb-Sp8                                                                                                    | 108 | 0 | 72 | 2 | 1 | 0.5962938 |
| 85  | GlcNAcb1-3Galb1-3GalNAca-Sp8                                                                                          | 124 | 0 | 69 | 2 | 1 | 0.5951223 |
| 366 | GalNAca1-3(Fuca1-2)Galb1-4GlcNAcb1-2Mana1-3(GalNAca1-3(Fuca1-2)Galb1-4GlcNAcb1-2Mana1-6)Manb1-4GlcNAcb1-4GlcNAcb-Sp20 | 231 | 1 | 57 | 2 | 1 | 0.5865356 |
| 176 | GlcNAcb1-4-MDPLys                                                                                                     | -10 | 0 | 83 | 3 | 1 | 0.6059029 |
| 37  | [4OSO3]Galb1-4GlcNAcb-Sp8                                                                                             | 278 | 1 | 50 | 2 | 1 | 0.5829075 |
| 152 | Galb1-4GlcNAcb1-3Galb1-4(Fuca1-3)GlcNAcb1-3Galb1-4(Fuca1-3)GlcNAcb-Sp0                                                | 161 | 1 | 63 | 2 | 1 | 0.5923251 |
| 290 | Galb1-3(Neu5Aca2-3Galb1-4(Fuca1-3)GlcNAcb1-6)GalNAca-Sp14                                                             | 124 | 0 | 67 | 2 | 1 | 0.5953026 |
| 61  | Fuca1-2Galb1-3GalNAcb1-4(Neu5Aca2-3)Galb1-4Glc-Sp9                                                                    | 391 | 1 | 36 | 1 | 1 | 0.5738982 |
| 398 | GalNAca1-3GalNAcb1-3Gala1-4Galb1-4GlcNAcb-Sp0                                                                         | 150 | 1 | 62 | 2 | 1 | 0.5934085 |
| 223 | Neu5Aca2-3(GalNAcb1-4)Galb1-4Glc-Sp0                                                                                  | 92  | 0 | 69 | 2 | 1 | 0.5980045 |
| 45  | Neu5Ac(9Ac)a-Sp8                                                                                                      | 90  | 0 | 68 | 2 | 1 | 0.5982745 |
| 71  | Fuca1-2Galb1-4GlcNAcb1-3Galb1-4GlcNAcb1-3Galb1-4GlcNAcb-Sp0                                                           | 143 | 1 | 61 | 2 | 1 | 0.5941303 |
| 259 | Neu5Aca2-6Galb1-4GlcNAcb1-3Galb1-4(Fuca1-3)GlcNAcb1-3Galb1-4(Fuca1-3)GlcNAcb-Sp0                                      | 277 | 1 | 44 | 1 | 1 | 5.84E-01  |
| 389 | GalNAca1-3(Fuca1-2)Galb1-3GalNAca1-3(Fuca1-2)Galb1-4GlcNAcb-Sp0                                                       | 358 | 1 | 34 | 1 | 1 | 0.577088  |
| 326 | Neu5Aca2-3Galb1-3(Fuca1-4)GlcNAcb1-3Galb1-3(Fuca1-4)GlcNAcb-Sp0                                                       | 269 | 1 | 44 | 1 | 1 | 0.5842689 |
| 110 | Gala1-3Galb1-4Glc-Sp0                                                                                                 | 74  | 0 | 64 | 2 | 1 | 0.6000729 |

|     |                                                                                                               |     |   |    |   |   |           |
|-----|---------------------------------------------------------------------------------------------------------------|-----|---|----|---|---|-----------|
| 296 | Galb1-4GlcNAcb1-6Galb1-4GlcNAcb-Sp0                                                                           | 45  | 0 | 67 | 2 | 1 | 0.6024077 |
| 19  | GlcNAcb1-3(GlcNAcb1-4)(GlcNAcb1-6)GlcNAc-Sp8                                                                  | 121 | 0 | 58 | 2 | 1 | 0.5963839 |
| 372 | Neu5Aca2-3Galb1-4GlcNAcb1-3GalNAc-Sp14                                                                        | 146 | 1 | 55 | 2 | 1 | 0.5944009 |
| 270 | Neu5Gca2-3Galb1-3GlcNAcb-Sp0                                                                                  | 107 | 0 | 58 | 2 | 1 | 0.5976445 |
| 124 | Galb1-4GlcNAcb1-6GalNAc-Sp8                                                                                   | -68 | 0 | 78 | 3 | 1 | 0.611531  |
| 174 | GlcNAcb1-3Galb1-4GlcNAcb1-3Galb1-4GlcNAcb-Sp0                                                                 | 183 | 1 | 49 | 2 | 1 | 0.5916025 |
| 336 | GlcNAca1-4Galb1-4GlcNAcb1-3Galb1-4Glc-Sp0                                                                     | 168 | 1 | 51 | 2 | 1 | 0.5927766 |
| 414 | Gala1-3(Fuca1-2)Galb1-4(Fuca1-3)GlcNAcb1-3GalNAc-Sp14                                                         | 60  | 0 | 63 | 2 | 1 | 0.6014203 |
| 386 | Fuca1-2Galb1-3GalNAca1-3(Fuca1-2)Galb1-4GlcNAcb-Sp0                                                           | 96  | 0 | 58 | 2 | 1 | 0.5986343 |
| 66  | Fuca1-2Galb1-4(Fuca1-3)GlcNAcb1-3Galb1-4(Fuca1-3)GlcNAcb-Sp0                                                  | 84  | 0 | 59 | 2 | 1 | 0.5996235 |
| 435 | Galb1-4Galb-Sp10                                                                                              | 97  | 0 | 58 | 2 | 1 | 0.5985444 |
| 272 | Neu5Gca2-3Galb1-4GlcNAcb-Sp0                                                                                  | 53  | 0 | 63 | 2 | 1 | 0.6020487 |
| 15  | GlcNAcb-Sp0                                                                                                   | 76  | 0 | 60 | 2 | 1 | 0.6002526 |
| 266 | Galb1-3(Fuca1-4)GlcNAcb1-3Galb1-3(Fuca1-4)GlcNAcb-Sp0                                                         | 99  | 0 | 57 | 2 | 1 | 0.5984544 |
| 381 | Fuca1-2Galb1-3(Fuca1-4)GlcNAcb1-3(Galb1-4(Fuca1-3)GlcNAcb1-6)Galb1-4Glc-Sp21                                  | 103 | 0 | 56 | 2 | 1 | 0.5981845 |
| 433 | Galb1-4GlcNAcb1-4(Galb1-4GlcNAcb1-2)Mana1-3(GlcNAcb1-4)(Galb1-4GlcNAcb1-2Mana1-6)Manb1-4GlcNAcb1-4GlcNAc-Sp21 | 24  | 0 | 65 | 2 | 1 | 0.60447   |
| 151 | Galb1-4GlcNAcb1-3GalNAc-Sp14                                                                                  | 89  | 0 | 57 | 2 | 1 | 0.5993538 |
| 417 | Fuca1-2Galb1-4GlcNAcb1-2Mana1-3(Fuca1-2Galb1-4GlcNAcb1-2Mana1-6)Manb1-4GlcNAcb1-4(Fuca1-6)GlcNAcb-Sp22        | 57  | 0 | 58 | 2 | 1 | 0.6021385 |
| 58  | Fuca1-2Galb1-3GalNAca-Sp8                                                                                     | 113 | 0 | 52 | 2 | 1 | 0.5976445 |
| 130 | Galb1-3(Neu5Aca2-6)GlcNAcb1-4Galb1-4Glc-Sp10                                                                  | 89  | 0 | 54 | 2 | 1 | 0.5996235 |
| 280 | Galb1-4(Fuca1-3)[6OSO3]GlcNAc-Sp0                                                                             | 102 | 0 | 52 | 2 | 1 | 0.5986343 |
| 163 | Galb1-4Glc-Sp8                                                                                                | 38  | 0 | 58 | 2 | 1 | 0.6038426 |
| 247 | Neu5Aca2-3Galb1-4GlcNAcb1-3Galb1-4GlcNAcb1-3Galb1-4GlcNAcb-Sp0                                                | 154 | 1 | 45 | 1 | 1 | 0.5945813 |
| 432 | Galb1-4GlcNAcb1-2Mana1-3(GlcNAcb1-4)(Galb1-4GlcNAcb1-2)Manb1-4GlcNAcb1-4GlcNAc-Sp21                           | 122 | 0 | 48 | 2 | 1 | 0.5971944 |
| 175 | GlcNAcb1-3Galb1-4Glc-Sp0                                                                                      | 80  | 0 | 52 | 2 | 1 | 0.600612  |
| 88  | GalNAca1-3GalNAcb-Sp8                                                                                         | 57  | 0 | 55 | 2 | 1 | 0.6024077 |
| 287 | [6OSO3]Galb1-4[6OSO3]GlcNAcb-Sp0                                                                              | 32  | 0 | 58 | 2 | 1 | 0.6043804 |
| 276 | Neu5Gca-Sp8                                                                                                   | -9  | 0 | 61 | 2 | 1 | 0.6077815 |
| 186 | Glc1-4Glc-Sp8                                                                                                 | 56  | 0 | 53 | 2 | 1 | 0.6026768 |
| 411 | GalNAca1-3(Fuca1-2)Galb1-4GlcNAcb1-3GalNAc-Sp14                                                               | 298 | 1 | 25 | 1 | 1 | 0.5833614 |
| 257 | Neu5Aca2-6Galb1-4GlcNAcb-Sp0                                                                                  | 61  | 0 | 52 | 2 | 1 | 0.6023179 |
| 327 | Neu5Aca2-6Galb1-4GlcNAcb1-3Galb1-4GlcNAcb1-3Galb1-4GlcNAcb-Sp0                                                | 41  | 0 | 54 | 2 | 1 | 6.04E-01  |
| 144 | Galb1-4(Fuca1-3)GlcNAcb1-4Galb1-4(Fuca1-3)GlcNAcb-Sp0                                                         | 101 | 0 | 47 | 2 | 1 | 0.599174  |
| 25  | [3OSO3]Galb1-4[6OSO3]Glc-Sp8                                                                                  | 106 | 0 | 46 | 2 | 1 | 0.5988142 |
| 408 | Galb1-3GalNAcb1-4(Neu5Aca2-8Neu5Aca2-3)Galb1-4Glc-Sp0                                                         | 75  | 0 | 49 | 2 | 1 | 0.6013305 |
| 407 | Neu5Aca2-6Galb1-3GlcNAcb1-3(Galb1-4GlcNAcb1-6)Galb1-4Glc-Sp21                                                 | 73  | 0 | 49 | 2 | 1 | 0.6015101 |
| 298 | GalNAcb1-3Galb-Sp8                                                                                            | 100 | 0 | 46 | 2 | 1 | 0.5993538 |
| 339 | GlcNAca1-4Galb1-3GalNAc-Sp14                                                                                  | 124 | 0 | 43 | 1 | 1 | 0.5974645 |
| 134 | Galb1-3GalNAcb1-3Gala1-4Galb1-4Glc-Sp0                                                                        | 79  | 0 | 48 | 2 | 1 | 0.6010611 |
| 304 | GlcNAcb1-4GlcNAcb-Sp12                                                                                        | 116 | 0 | 44 | 1 | 1 | 0.5980945 |
| 76  | Fuca1-3GlcNAcb-Sp8                                                                                            | 39  | 0 | 52 | 2 | 1 | 0.6042908 |
| 196 | KDNa2-3Galb1-3GlcNAcb-Sp0                                                                                     | 61  | 0 | 50 | 2 | 1 | 0.6024974 |
| 297 | GalNAca-Sp15                                                                                                  | 122 | 0 | 43 | 1 | 1 | 0.5976445 |
| 172 | GlcNAcb1-3Galb1-4GlcNAcb-Sp0                                                                                  | 58  | 0 | 50 | 2 | 1 | 0.6027665 |
| 208 | Manb1-4GlcNAcb-Sp0                                                                                            | 49  | 0 | 51 | 2 | 1 | 0.603484  |
| 230 | Neu5Aca2-3Galb1-3(Fuca1-4)GlcNAcb1-3Galb1-4(Fuca1-3)GlcNAcb-Sp0                                               | 198 | 1 | 33 | 1 | 1 | 0.5916929 |
| 335 | GlcNAca1-4Galb1-3GlcNAcb-Sp0                                                                                  | 67  | 0 | 48 | 2 | 1 | 0.6021385 |
| 62  | Fuca1-2Galb1-3GlcNAcb1-3Galb1-4Glc-Sp8                                                                        | 82  | 0 | 46 | 2 | 1 | 0.6009713 |
| 239 | Neu5Aca2-3Galb1-3GlcNAcb-Sp8                                                                                  | 48  | 0 | 49 | 2 | 1 | 0.603753  |
| 362 | Neu5Aca2-6GlcNAcb1-4GlcNAc-Sp21                                                                               | 82  | 0 | 45 | 2 | 1 | 0.6010611 |
| 28  | [3OSO3]Galb1-3GlcNAcb-Sp8                                                                                     | 34  | 0 | 50 | 2 | 1 | 0.6049179 |

|     |                                                                                                                 |      |    |    |   |   |           |
|-----|-----------------------------------------------------------------------------------------------------------------|------|----|----|---|---|-----------|
| 438 | GalNAcb1-6GalNAcb-Sp8                                                                                           | 109  | 0  | 41 | 1 | 1 | 0.5989941 |
| 154 | Galb1-4GlcNAcb1-3Galb1-4GlcNAcb-Sp0                                                                             | 91   | 0  | 43 | 1 | 1 | 0.6004323 |
| 171 | GlcNAcb1-3Galb-Sp8                                                                                              | 30   | 0  | 50 | 2 | 1 | 0.6052762 |
| 31  | [3OSO3]Galb1-4[6OSO3]GlcNAcb-Sp0                                                                                | 63   | 0  | 46 | 2 | 1 | 0.6026768 |
| 136 | Galb1-3GalNAcb1-4Galb1-4Glc-Sp8                                                                                 | 124  | 0  | 39 | 1 | 1 | 0.5978246 |
| 387 | Galb1-3GlcNAcb1-3GalNAca-Sp14                                                                                   | 109  | 0  | 40 | 1 | 1 | 0.599084  |
| 243 | Neu5Aca2-3Galb1-4(Fuca1-3)GlcNAcb-Sp0                                                                           | 23   | 0  | 49 | 2 | 1 | 0.6059924 |
| 431 | GlcNAcb1-4(GlcNAcb1-2)Mana1-3(GlcNAcb1-4)(GlcNAcb1-6(GlcNAcb1-2)Mana1-6)Manb1-4GlcNAcb1-4GlcNAcb-Sp21           | 73   | 0  | 44 | 1 | 1 | 0.601959  |
| 178 | GlcNAcb1-4Galb1-4GlcNAcb-Sp8                                                                                    | 20   | 0  | 49 | 2 | 1 | 0.6062609 |
| 113 | Gala1-4Galb1-4GlcNAcb-Sp0                                                                                       | 136  | 1  | 36 | 1 | 1 | 0.5970144 |
| 44  | [6OSO3]GlcNAcb-Sp8                                                                                              | 14   | 0  | 49 | 2 | 1 | 0.6067978 |
| 404 | GalNAcb1-3Gala1-6Galb1-4Glc-Sp8                                                                                 | 72   | 0  | 42 | 1 | 1 | 0.6022282 |
| 159 | Galb1-3(Galb1-4GlcNAcb1-6)GalNAcb-Sp14                                                                          | 57   | 0  | 43 | 1 | 1 | 0.603484  |
| 86  | GalNAca1-3(Fuca1-2)Galb-Sp8                                                                                     | 111  | 0  | 37 | 1 | 1 | 0.599174  |
| 182 | GlcNAcb1-6(Galb1-3)GalNAca-Sp8                                                                                  | 59   | 0  | 43 | 1 | 1 | 0.6033047 |
| 95  | GalNAcb1-4GlcNAcb-Sp0                                                                                           | 68   | 0  | 41 | 1 | 1 | 0.6026768 |
| 274 | Neu5Gca2-6GalNAca-Sp0                                                                                           | 78   | 0  | 40 | 1 | 1 | 0.6018692 |
| 89  | GalNAca1-3Galb-Sp8                                                                                              | 132  | 0  | 34 | 1 | 1 | 0.5975545 |
| 254 | Neu5Aca2-6GalNAca-Sp8                                                                                           | 42   | 0  | 43 | 1 | 1 | 0.6048284 |
| 29  | [3OSO3]Galb1-4(Fuca1-3)GlcNAcb-Sp0                                                                              | 114  | 0  | 35 | 1 | 1 | 0.599084  |
| 209 | Neu5Aca2-3Galb1-4GlcNAcb1-3Galb1-4(Fuca1-3)GlcNAcb-Sp0                                                          | 64   | 0  | 40 | 1 | 1 | 0.6031253 |
| 75  | Fuca1-2Galb-Sp8                                                                                                 | 7    | 0  | 46 | 2 | 1 | 0.6076921 |
| 305 | HOOC(CH3)CH-3-O-GlcNAcb1-4GlcNAcb-Sp10                                                                          | 114  | 0  | 34 | 1 | 1 | 0.599174  |
| 127 | Galb1-3(Neu5Aca2-6)GalNAca-Sp8                                                                                  | 61   | 0  | 40 | 1 | 1 | 0.6033944 |
| 79  | GalNAca1-3(Fuca1-2)Galb1-3GlcNAcb-Sp0                                                                           | 121  | 0  | 33 | 1 | 1 | 0.5986343 |
| 252 | Neu5Aca2-3Galb1-4Glc-Sp0                                                                                        | 81   | 0  | 37 | 1 | 1 | 0.6018692 |
| 210 | [3OSO3]Galb1-4(Fuca1-3)[6OSO3]GlcNAcb-Sp8                                                                       | 79   | 0  | 37 | 1 | 1 | 0.6020487 |
| 60  | Fuca1-2Galb1-3GalNAcb1-4(Neu5Aca2-3)Galb1-4Glc-Sp0                                                              | 99   | 0  | 34 | 1 | 1 | 0.6005222 |
| 143 | Galb1-4(Fuca1-3)GlcNAcb-Sp8                                                                                     | 6    | 0  | 45 | 2 | 1 | 0.6078709 |
| 420 | Gala1-3(Fuca1-2)Galb1-3GlcNAcb1-3GalNAcb-Sp14                                                                   | 44   | 0  | 40 | 1 | 1 | 0.6049179 |
| 281 | Galb1-4(Fuca1-3)[6OSO3]Glc-Sp0                                                                                  | 146  | 1  | 29 | 1 | 1 | 0.5967442 |
| 12  | Glc-Sp8                                                                                                         | 50   | 0  | 40 | 1 | 1 | 0.6043804 |
| 4   | GalNAca-Sp8                                                                                                     | 125  | 0  | 31 | 1 | 1 | 0.5984544 |
| 149 | Galb1-4GalNAcb1-3(Fuca1-2)Galb1-4GlcNAcb-Sp8                                                                    | -139 | -1 | 61 | 2 | 1 | 0.6193532 |
| 220 | Neu5Aca2-3(6-O-Su)Galb1-4(Fuca1-3)GlcNAcb-Sp8                                                                   | 27   | 0  | 42 | 1 | 1 | 0.6062609 |
| 244 | Neu5Aca2-3Galb1-4(Fuca1-3)GlcNAcb-Sp8                                                                           | -6   | 0  | 45 | 2 | 1 | 0.6089432 |
| 8   | Neu5Aca-Sp8                                                                                                     | 88   | 0  | 34 | 1 | 1 | 0.6015101 |
| 38  | 6-H2PO3Mana-Sp8                                                                                                 | 80   | 0  | 35 | 1 | 1 | 0.6021385 |
| 256 | Neu5Aca2-6Galb1-4[6OSO3]GlcNAcb-Sp8                                                                             | 54   | 0  | 38 | 1 | 1 | 6.04E-01  |
| 294 | Galb1-4GlcNAcb1-3(GlcNAcb1-6)Galb1-4GlcNAcb-Sp0                                                                 | 36   | 0  | 40 | 1 | 1 | 0.6056344 |
| 402 | Galb1-3GlcNAcb1-6Galb1-4GlcNAcb-Sp0                                                                             | -11  | 0  | 45 | 2 | 1 | 0.6093897 |
| 261 | Neu5Aca2-6Galb1-4Glc-Sp0                                                                                        | 15   | 0  | 42 | 1 | 1 | 0.6073344 |
| 232 | Neu5Aca2-3Galb1-3[6OSO3]GalNAca-Sp8                                                                             | 21   | 0  | 41 | 1 | 1 | 0.6068873 |
| 103 | Gala1-3(Gala1-4)Galb1-4GlcNAcb-Sp8                                                                              | 57   | 0  | 36 | 1 | 1 | 0.6041115 |
| 177 | GlcNAcb1-4(GlcNAcb1-6)GalNAca-Sp8                                                                               | -127 | 0  | 57 | 2 | 1 | 0.6186441 |
| 14  | GalNAcb-Sp8                                                                                                     | 194  | 1  | 20 | 1 | 1 | 0.593228  |
| 138 | Galb1-3GlcNAcb1-3Galb1-4GlcNAcb-Sp0                                                                             | -4   | 0  | 42 | 1 | 1 | 0.6090325 |
| 368 | Gala1-3Galb1-4(Fuca1-3)GlcNAcb1-2Mana1-3(Gala1-3Galb1-4(Fuca1-3)GlcNAcb1-2Mana1-6)Manb1-4GlcNAcb1-4GlcNAcb-Sp20 | 74   | 0  | 33 | 1 | 1 | 0.6028563 |
| 403 | Galb1-3GlcNAca1-6Galb1-4GlcNAcb-Sp0                                                                             | 56   | 0  | 35 | 1 | 1 | 0.6042908 |
| 224 | Neu5Aca2-3(Neu5Aca2-3Galb1-3GalNAcb1-4)Galb1-4Glc-Sp0                                                           | -33  | 0  | 45 | 2 | 1 | 0.6113527 |
| 364 | Fuca1-2Galb1-3GlcNAcb1-3(Galb1-4(Fuca1-3)GlcNAcb1-6)Galb1-4Glc-Sp21                                             | 60   | 0  | 34 | 1 | 1 | 0.6040219 |

|     |                                                                                           |      |    |    |   |   |           |
|-----|-------------------------------------------------------------------------------------------|------|----|----|---|---|-----------|
| 168 | GlcNAcb1-3(GlcNAcb1-6)Galb1-4GlcNAcb-Sp8                                                  | 54   | 0  | 34 | 1 | 1 | 0.6045596 |
| 125 | Galb1-3(GlcNAcb1-6)GalNAca-Sp8                                                            | -85  | 0  | 50 | 2 | 1 | 0.6155369 |
| 318 | Neu5Gcb2-6Galb1-4GlcNAc-Sp8                                                               | 61   | 0  | 33 | 1 | 1 | 0.6040219 |
| 13  | Manb-Sp8                                                                                  | 128  | 0  | 25 | 1 | 1 | 0.5987243 |
| 263 | Neu5Aca2-6Galb-Sp8                                                                        | 21   | 0  | 37 | 1 | 1 | 0.607245  |
| 212 | Fuca1-2Galb1-4[6OSO3]GlcNAc-Sp8                                                           | 33   | 0  | 36 | 1 | 1 | 0.6062609 |
| 91  | GalNAcb1-3GalNAca-Sp8                                                                     | 50   | 0  | 34 | 1 | 1 | 0.6049179 |
| 214 | Neu5Aca2-3Galb1-3GalNAca-Sp8                                                              | 41   | 0  | 34 | 1 | 1 | 0.6057239 |
| 187 | Glca1-4Glca-Sp8                                                                           | 32   | 0  | 35 | 1 | 1 | 0.6064399 |
| 97  | Gala1-2Galb-Sp8                                                                           | 46   | 0  | 33 | 1 | 1 | 0.6053658 |
| 190 | Glcb1-6Glcb-Sp8                                                                           | 61   | 0  | 31 | 1 | 1 | 0.6042012 |
| 234 | Neu5Aca2-3Galb-Sp8                                                                        | 23   | 0  | 35 | 1 | 1 | 0.607245  |
| 211 | Fuca1-2[6OSO3]Galb1-4GlcNAc-Sp0                                                           | 24   | 0  | 35 | 1 | 1 | 0.6071556 |
| 377 | Galb1-3GalNAca1-3(Fuca1-2)Galb1-4GlcNAc-Sp0                                               | 79   | 0  | 29 | 1 | 1 | 0.6027665 |
| 376 | Galb1-3GalNAca1-3(Fuca1-2)Galb1-4Glc-Sp0                                                  | 40   | 0  | 33 | 1 | 1 | 0.6059029 |
| 11  | Galb-Sp8                                                                                  | -48  | 0  | 43 | 1 | 1 | 0.6128677 |
| 10  | Neu5Acb-Sp8                                                                               | 8    | 0  | 37 | 1 | 1 | 0.6084071 |
| 137 | Galb1-3Galb-Sp8                                                                           | 64   | 0  | 30 | 1 | 1 | 0.6040219 |
| 237 | Fuca1-2[6OSO3]Galb1-4Glc-Sp0                                                              | 51   | 0  | 31 | 1 | 1 | 0.6050971 |
| 405 | GlcNAcb1-6(GlcNAcb1-3)GalNAca-Sp14                                                        | 21   | 0  | 35 | 1 | 1 | 0.6074239 |
| 120 | Galb1-3(Fuca1-4)GlcNAcb1-3Galb1-4GlcNAcb-Sp0                                              | 57   | 0  | 30 | 1 | 1 | 0.6046492 |
| 240 | Neu5Aca2-3Galb1-4[6OSO3]GlcNAcb-Sp8                                                       | 44   | 0  | 31 | 1 | 1 | 0.6057239 |
| 5   | Fuca-Sp8                                                                                  | 51   | 0  | 30 | 1 | 1 | 0.6051866 |
| 9   | Neu5Aca-Sp11                                                                              | -4   | 0  | 36 | 1 | 1 | 0.6095683 |
| 104 | Gala1-3GalNAca-Sp8                                                                        | 65   | 0  | 28 | 1 | 1 | 0.6041115 |
| 242 | Neu5Aca2-3Galb1-4(Fuca1-3)GlcNAcb1-3Galb1-4(Fuca1-3)GlcNAcb1-3Galb1-4(Fuca1-3)GlcNAcb-Sp0 | -69  | 0  | 43 | 1 | 1 | 0.6147367 |
| 121 | Galb1-3(Fuca1-4)GlcNAcb-Sp0                                                               | 20   | 0  | 33 | 1 | 1 | 0.6076921 |
| 409 | Neu5Aca2-3Galb1-3GalNAcb1-4(Neu5Aca2-8Neu5Aca2-3)Galb1-4Glcb-Sp0                          | 81   | 0  | 26 | 1 | 1 | 0.6028563 |
| 267 | Neu5Acb2-6GalNAca-Sp8                                                                     | 80   | 0  | 26 | 1 | 1 | 0.602946  |
| 262 | Neu5Aca2-6Galb1-4Glcb-Sp8                                                                 | 13   | 0  | 33 | 1 | 1 | 0.6083178 |
| 82  | GalNAca1-3(Fuca1-2)Galb1-4GlcNAcb-Sp0                                                     | 125  | 0  | 20 | 1 | 1 | 0.5994437 |
| 1   | Gala-Sp8                                                                                  | 80   | 0  | 25 | 1 | 1 | 0.6030356 |
| 260 | Neu5Aca2-6Galb1-4GlcNAcb1-3Galb1-4GlcNAcb-Sp0                                             | -27  | 0  | 37 | 1 | 1 | 6.12E-01  |
| 213 | Fuca1-2[6OSO3]Galb1-4[6OSO3]Glc-Sp0                                                       | 99   | 0  | 23 | 1 | 1 | 0.6015101 |
| 238 | Neu5Aca2-3Galb1-3GlcNAcb-Sp0                                                              | 10   | 0  | 31 | 1 | 1 | 0.6087645 |
| 436 | Galb1-6Galb-Sp10                                                                          | 71   | 0  | 24 | 1 | 1 | 0.6039323 |
| 355 | KDNa2-3Galb1-3GalNAca-Sp14                                                                | 71   | 0  | 24 | 1 | 1 | 0.6039323 |
| 21  | [3OSO3][6OSO3]Galb1-4GlcNAcb-Sp0                                                          | 10   | 0  | 31 | 1 | 1 | 0.6087645 |
| 325 | Neu5Aca2-6Galb1-4GlcNAcb1-3Galb1-3GlcNAcb-Sp0                                             | -222 | -1 | 57 | 2 | 1 | 6.27E-01  |
| 166 | GlcNAcb1-2Galb1-3GalNAca-Sp8                                                              | 47   | 0  | 26 | 1 | 1 | 0.6059029 |
| 148 | Galb1-4GalNAca1-3(Fuca1-2)Galb1-4GlcNAcb-Sp8                                              | -17  | 0  | 34 | 1 | 1 | 0.6109068 |
| 219 | Neu5Aca2-8Neu5Aca2-8Neu5Aca-Sp8                                                           | 57   | 0  | 25 | 1 | 1 | 0.6050971 |
| 34  | [3OSO3]Galb1-4GlcNAcb-Sp8                                                                 | 4    | 0  | 31 | 1 | 1 | 0.6093004 |
| 329 | GalNAcb1-3Gala1-4Galb1-4GlcNAcb1-3Galb1-4Glcb-Sp0                                         | 11   | 0  | 30 | 1 | 1 | 0.6087645 |
| 218 | Neu5Aca2-8Neu5Aca2-3(GalNAcb1-4)Galb1-4Glcb-Sp0                                           | -29  | 0  | 34 | 1 | 1 | 0.6119767 |
| 184 | GlcNAcb1-6GalNAca-Sp14                                                                    | 20   | 0  | 28 | 1 | 1 | 0.608139  |
| 185 | GlcNAcb1-6Galb1-4GlcNAcb-Sp8                                                              | 61   | 0  | 23 | 1 | 1 | 0.6049179 |
| 32  | [3OSO3]Galb1-4[6OSO3]GlcNAcb-Sp8                                                          | -2   | 0  | 30 | 1 | 0 | 0.6099253 |
| 142 | Galb1-4(Fuca1-3)GlcNAcb-Sp0                                                               | 15   | 0  | 28 | 1 | 0 | 0.6085858 |
| 227 | Neu5Aca2-3GalNAcb1-4GlcNAcb-Sp0                                                           | -1   | 0  | 30 | 1 | 0 | 0.6098361 |
| 342 | Neu5Aca2-6Galb1-4GlcNAcb1-2Mana1-6Manb1-4GlcNAcb1-4GlcNAc-Sp12                            | 54   | 0  | 23 | 1 | 0 | 0.6055448 |

|     |                                                                                                               |      |    |    |   |   |           |
|-----|---------------------------------------------------------------------------------------------------------------|------|----|----|---|---|-----------|
| 236 | Neu5Aca2-3Galb1-3GlcNAcb1-3Galb1-4GlcNAcb-Sp0                                                                 | 41   | 0  | 24 | 1 | 0 | 0.6066189 |
| 114 | Gala1-4Galb1-4GlcNAcb-Sp8                                                                                     | 13   | 0  | 27 | 1 | 0 | 0.6088538 |
| 93  | GalNAcb1-3Gala1-4Galb1-4GlcNAcb-Sp0                                                                           | -18  | 0  | 31 | 1 | 0 | 0.6112636 |
| 147 | Galb1-4[6OSO3]Glc-Sp8                                                                                         | 55   | 0  | 23 | 1 | 0 | 0.6054553 |
| 328 | Gala1-4Galb1-4GlcNAcb1-3Galb1-4Glc-Sp0                                                                        | 62   | 0  | 22 | 1 | 0 | 0.6049179 |
| 123 | Galb1-3(Fuca1-4)GlcNAcb-Sp8                                                                                   | 66   | 0  | 21 | 1 | 0 | 0.6046492 |
| 115 | Gala1-4Galb1-4Glc-Sp0                                                                                         | 53   | 0  | 22 | 1 | 0 | 0.6057239 |
| 36  | [4OSO3][6OSO3]Galb1-4GlcNAcb-Sp0                                                                              | 57   | 0  | 21 | 1 | 0 | 0.6054553 |
| 353 | KDNa2-6Galb1-4GlcNAc-Sp0                                                                                      | 102  | 0  | 16 | 1 | 0 | 6.02E-01  |
| 100 | Gala1-3(Fuca1-2)Galb1-4GlcNAc-Sp0                                                                             | -132 | 0  | 41 | 1 | 0 | 0.6205047 |
| 191 | G-ol-Sp8                                                                                                      | 35   | 0  | 22 | 1 | 0 | 0.6073344 |
| 140 | Galb1-3GlcNAcb-Sp0                                                                                            | 47   | 0  | 20 | 1 | 0 | 0.6064399 |
| 59  | Fuca1-2Galb1-3GalNAca-Sp14                                                                                    | 7    | 0  | 24 | 1 | 0 | 0.6096575 |
| 27  | [3OSO3]Galb1-3GalNAca-Sp8                                                                                     | -23  | 0  | 27 | 1 | 0 | 0.6120658 |
| 434 | Galb1-4GlcNAcb1-2Mana1-3(GlcNAcb1-4)(Galb1-4GlcNAcb1-6(Galb1-4GlcNAcb1-2)Mana1-6)Manb1-4GlcNAcb1-4GlcNAc-Sp21 | -42  | 0  | 29 | 1 | 0 | 0.61358   |
| 101 | Gala1-3(Fuca1-2)Galb1-4Glc-Sp0                                                                                | -129 | 0  | 39 | 1 | 0 | 0.6204162 |
| 56  | Fuca1-2Galb1-3GalNAcb1-3Gala1-4Galb1-4Glc-Sp9                                                                 | -16  | 0  | 26 | 1 | 0 | 0.611531  |
| 291 | Galb1-3Galb1-4GlcNAcb-Sp8                                                                                     | 68   | 0  | 16 | 1 | 0 | 0.6049179 |
| 288 | 6-H2PO3Glc-Sp10                                                                                               | 83   | 0  | 14 | 0 | 0 | 0.603753  |
| 416 | Galb1-4(Fuca1-3)GlcNAcb1-2Mana1-3(Galb1-4(Fuca1-3)GlcNAcb1-2Mana1-6)Manb1-4GlcNAcb1-4(Fuca1-6)GlcNAcb-Sp22    | -44  | 0  | 28 | 1 | 0 | 0.613847  |
| 283 | Galb1-4GlcNAcb1-3Galb1-3GlcNAcb-Sp0                                                                           | 72   | 0  | 15 | 1 | 0 | 0.6046492 |
| 265 | Neu5Aca2-8Neu5Aca2-3Galb1-4Glc-Sp0                                                                            | 32   | 0  | 18 | 1 | 0 | 0.6079603 |
| 112 | Gala1-4(Fuca1-2)Galb1-4GlcNAcb-Sp8                                                                            | 39   | 0  | 17 | 1 | 0 | 0.6074239 |
| 162 | Galb1-4Glc-Sp0                                                                                                | 113  | 0  | 9  | 0 | 0 | 0.6015101 |
| 35  | [3OSO3]Galb-Sp8                                                                                               | 25   | 0  | 18 | 1 | 0 | 0.6085858 |
| 278 | Galb1-3GalNAca-Sp14                                                                                           | 21   | 0  | 18 | 1 | 0 | 0.6089432 |
| 302 | GlcNAcb1-3Man-Sp10                                                                                            | 6    | 0  | 20 | 1 | 0 | 0.6101038 |
| 426 | Fuca1-2Galb1-3GlcNAcb1-3(Galb1-4GlcNAcb1-6)Galb1-4Glc-Sp21                                                    | -13  | 0  | 22 | 1 | 0 | 0.6116202 |
| 141 | Galb1-3GlcNAcb-Sp8                                                                                            | 44   | 0  | 15 | 1 | 0 | 0.6071556 |
| 248 | Neu5Aca2-3Galb1-4GlcNAcb-Sp0                                                                                  | -58  | 0  | 27 | 1 | 0 | 0.6151813 |
| 189 | Glc1-4Glc-Sp8                                                                                                 | 73   | 0  | 11 | 0 | 0 | 0.6049179 |
| 264 | Neu5Aca2-8Neu5Aca-Sp8                                                                                         | 28   | 0  | 16 | 1 | 0 | 0.6084965 |
| 160 | Galb1-4GlcNAcb-Sp0                                                                                            | 55   | 0  | 13 | 0 | 0 | 0.6063504 |
| 55  | Fuca1-2Galb1-3GalNAcb1-3Gala-Sp9                                                                              | 50   | 0  | 13 | 0 | 0 | 0.6067978 |
| 108 | Gala1-3Galb1-3GlcNAcb-Sp0                                                                                     | -31  | 0  | 22 | 1 | 0 | 0.6132239 |
| 77  | Fuca1-4GlcNAcb-Sp8                                                                                            | 92   | 0  | 7  | 0 | 0 | 0.6035737 |
| 285 | Neu5Aca2-3Galb1-4GlcNAcb1-3Galb1-3GlcNAcb-Sp0                                                                 | 22   | 0  | 15 | 1 | 0 | 0.6091218 |
| 429 | GlcNAcb1-4(GlcNAcb1-2)Mana1-3(GlcNAcb1-4)(GlcNAcb1-2Mana1-6)Manb1-4GlcNAcb1-4GlcNAc-Sp21                      | 84   | 0  | 8  | 0 | 0 | 0.6042012 |
| 316 | Neu5Aca2-8Neu5Acb-Sp17                                                                                        | -55  | 0  | 24 | 1 | 0 | 0.6151813 |
| 194 | GlcAb1-3Galb-Sp8                                                                                              | -2   | 0  | 17 | 1 | 0 | 0.6110852 |
| 92  | GalNAcb1-3(Fuca1-2)Galb-Sp8                                                                                   | 11   | 0  | 16 | 1 | 0 | 0.6100146 |
| 310 | Neu5Aca2-3Galb1-3(Neu5Aca2-3Galb1-4GlcNAcb1-6)GalNAca-Sp14                                                    | -102 | 0  | 29 | 1 | 0 | 0.6189101 |
| 117 | Gala1-6Glc-Sp8                                                                                                | 20   | 0  | 14 | 0 | 0 | 0.6093897 |
| 165 | GlcNAca1-6Galb1-4GlcNAcb-Sp8                                                                                  | 34   | 0  | 12 | 0 | 0 | 0.6083178 |
| 161 | Galb1-4GlcNAcb-Sp8                                                                                            | 38   | 0  | 11 | 0 | 0 | 0.6080497 |
| 116 | Gala1-4GlcNAcb-Sp8                                                                                            | 37   | 0  | 11 | 0 | 0 | 0.6081139 |
| 139 | Galb1-3GlcNAcb1-3Galb1-4Glc-Sp10                                                                              | 64   | 0  | 8  | 0 | 0 | 0.6059924 |
| 226 | Neu5Aca2-3GalNAca-Sp8                                                                                         | -135 | -1 | 30 | 1 | 0 | 0.6217436 |
| 241 | Neu5Aca2-3Galb1-4(Fuca1-3)[6OSO3]GlcNAcb-Sp8                                                                  | 6    | 0  | 14 | 0 | 0 | 0.6106392 |
| 192 | GlcAa-Sp8                                                                                                     | -15  | 0  | 16 | 1 | 0 | 0.6123332 |
| 169 | GlcNAcb1-3GalNAca-Sp8                                                                                         | 38   | 0  | 10 | 0 | 0 | 0.6081139 |



|     |                                                                                 |      |    |     |    |    |           |
|-----|---------------------------------------------------------------------------------|------|----|-----|----|----|-----------|
| 94  | GalNAcb1-4(Fuca1-3)GlcNAcb-Sp0                                                  | -3   | 0  | 15  | 0  | 0  | 0.6113527 |
| 118 | Galb1-2Galb-Sp8                                                                 | -40  | 0  | 18  | 1  | 0  | 0.6143809 |
| 440 | [6OSO3]Galb1-3[6OSO3]GlcNAc-Sp0                                                 | -31  | 0  | 16  | 1  | 0  | 0.613758  |
| 233 | Neu5Aca2-3Galb1-3(Neu5Aca2-6)GalNAca-Sp8                                        | -11  | 0  | 14  | 0  | 0  | 0.612155  |
| 6   | Fuca-Sp9                                                                        | 30   | 0  | 8   | 0  | 0  | 0.6090325 |
| 401 | Gala1-3Galb1-4GlcNAcb1-3GalNAca-Sp14                                            | 26   | 0  | 9   | 0  | 0  | 0.6093004 |
| 74  | Fuca1-2Galb1-4Glc-Sp0                                                           | 2    | 0  | 11  | 0  | 0  | 0.6112636 |
| 289 | Gala1-3(Fuca1-2)Galb-Sp18                                                       | 30   | 0  | 8   | 0  | 0  | 0.6090325 |
| 312 | Neu5Aca2-3Galb1-3GalNAca-Sp14                                                   | 5    | 0  | 10  | 0  | 0  | 0.6110852 |
| 188 | Glc1-6Glc1-6Glc-Sp8                                                             | 16   | 0  | 9   | 0  | 0  | 0.6101931 |
| 57  | Fuca1-2Galb1-3(Fuca1-4)GlcNAcb-Sp8                                              | 10   | 0  | 8   | 0  | 0  | 0.6108176 |
| 72  | Fuca1-2Galb1-4GlcNAcb-Sp0                                                       | 7    | 0  | 8   | 0  | 0  | 0.6110852 |
| 195 | GlcAb1-6Galb-Sp8                                                                | 25   | 0  | 6   | 0  | 0  | 0.6096575 |
| 286 | [3OSO3][4OSO3]Galb1-4GlcNAcb-Sp0                                                | -62  | 0  | 15  | 1  | 0  | 0.6166031 |
| 26  | [3OSO3]Galb1-3(Fuca1-4)GlcNAcb-Sp8                                              | 29   | 0  | 5   | 0  | 0  | 0.6093897 |
| 167 | GlcNAcb1-3(GlcNAcb1-6)GalNAca-Sp8                                               | 53   | 0  | 1   | 0  | 0  | 0.6076027 |
| 119 | Galb1-3(Fuca1-4)GlcNAcb1-3Galb1-4(Fuca1-3)GlcNAcb-Sp0                           | 25   | 0  | 5   | 0  | 0  | 0.6097468 |
| 3   | Mana-Sp8                                                                        | -48  | 0  | 12  | 0  | 0  | 0.6156258 |
| 225 | Neu5Aca2-3(Neu5Aca2-6)GalNAca-Sp8                                               | -187 | -1 | 27  | 1  | 0  | 0.6265985 |
| 73  | Fuca1-2Galb1-4GlcNAcb-Sp8                                                       | -21  | 0  | 6   | 0  | 0  | 0.613758  |
| 145 | Galb1-4(Fuca1-3)GlcNAcb1-4Galb1-4(Fuca1-3)GlcNAcb1-4Galb1-4(Fuca1-3)GlcNAcb-Sp0 | 13   | 0  | 2   | 0  | 0  | 0.6110852 |
| 354 | KDNa2-3Galb1-4Glc-Sp0                                                           | -32  | 0  | 6   | 0  | 0  | 0.6147367 |
| 33  | [3OSO3]Galb1-4GlcNAcb-Sp0                                                       | 3    | 0  | 1   | 0  | 0  | 0.6120658 |
| 170 | GlcNAcb1-3GalNAca-Sp14                                                          | 34   | 0  | -4  | 0  | 0  | 0.6097468 |
| 410 | Gala1-3(Fuca1-2)Galb1-4GlcNAcb1-3GalNAca-Sp14                                   | 14   | 0  | -2  | 0  | 0  | 0.6113527 |
| 250 | Neu5Aca2-3Galb1-4GlcNAcb1-3Galb1-4GlcNAcb-Sp0                                   | -97  | 0  | 10  | 0  | 0  | 0.6201505 |
| 217 | Neu5Aca2-8Neu5Aca2-8Neu5Aca2-3Galb1-4Glc-Sp0                                    | -10  | 0  | -4  | 0  | 0  | 0.613669  |
| 2   | Glc-Sp8                                                                         | 5    | 0  | -6  | 0  | 0  | 0.6125114 |
| 277 | Galb1-3(Neu5Aca2-3Galb1-4GlcNAcb1-6)GalNAca-Sp14                                | -188 | -1 | 14  | 0  | 0  | 0.6278311 |
| 249 | Neu5Aca2-3Galb1-4GlcNAcb-Sp8                                                    | -165 | -1 | 8   | 0  | 0  | 0.6263342 |
| 84  | GalNAca1-3(Fuca1-2)Galb1-4Glc-Sp0                                               | -77  | 0  | -5  | 0  | 0  | 0.6197077 |
| 132 | Galb1-3GalNAca-Sp16                                                             | -91  | 0  | -5  | 0  | 0  | 0.6209473 |
| 324 | Neu5Ac(9Ac)a2-3Galb1-3GlcNAcb-Sp0                                               | -80  | 0  | -12 | 0  | 0  | 0.6205933 |
| 17  | GlcN(Gc)b-Sp8                                                                   | -136 | -1 | -9  | 0  | 0  | 0.6252764 |
| 40  | [6OSO3]Galb1-4Glc-Sp8                                                           | -137 | -1 | -28 | -1 | -1 | 0.6270389 |
| 64  | Fuca1-2Galb1-3GlcNAcb-Sp0                                                       | -106 | 0  | -35 | -1 | -1 | 0.6249236 |
| 268 | Neu5Acb2-6Galb1-4GlcNAcb-Sp8                                                    | -131 | 0  | -35 | -1 | -1 | 0.6271269 |
| 156 | Galb1-4GlcNAcb1-3Galb1-4Glc-Sp8                                                 | -157 | -1 | -35 | -1 | -1 | 0.629414  |

| Spacer Abbreviation | Chemical Structure                                                                              |
|---------------------|-------------------------------------------------------------------------------------------------|
| Sp0                 | CH <sub>2</sub> CH <sub>2</sub> NH <sub>2</sub>                                                 |
| Sp8                 | CH <sub>2</sub> CH <sub>2</sub> CH <sub>2</sub> NH <sub>2</sub>                                 |
| Sp9                 | CH <sub>2</sub> CH <sub>2</sub> CH <sub>2</sub> CH <sub>2</sub> CH <sub>2</sub> NH <sub>2</sub> |
| Sp10                | NHCOCH <sub>2</sub> NH                                                                          |
| Sp11                | OCH <sub>2</sub> C <sub>6</sub> H <sub>4</sub> -p-NHCOCH <sub>2</sub> NH                        |
| Sp12                | Asparagine                                                                                      |
| Sp13                | Glycine                                                                                         |
| Sp14                | Threonine                                                                                       |
| Sp15                | Serine                                                                                          |
| Sp16                | PNP (OC <sub>6</sub> H <sub>4</sub> NH <sub>2</sub> )                                           |
| Sp17                | OCH <sub>2</sub> C <sub>6</sub> H <sub>4</sub> NH <sub>2</sub>                                  |

|        |                                                                   |
|--------|-------------------------------------------------------------------|
| Sp18   | $O(CH_2)_3NHCO(CH_2)_6NH_2$                                       |
| Sp19   | EN or NK                                                          |
| Sp20   | GENR                                                              |
| Sp21   | $N(CH_3)-O-(CH_2)_2-NH_2$                                         |
| Sp22   | NST                                                               |
| MDPLys | Mur-L-Ala-D-iGlnb-(CH <sub>2</sub> ) <sub>4</sub> NH <sub>2</sub> |
