# Supplementary material
Source: PubMed Central journal article supplement (PMC3459425)
Supplement: Supp_Table6.pdf [file Supp_Table6.pdf]

**Supplementary Table 6 Biotinylated Gal-8 at 50 and 5 µg/ml binding to v4.2 of the CFG glycan array detected with Alexa488-labeled Streptavidin and sorted according to Rank based on percent of maximum RFU.**

anomeric configuration of monosaccharides indicated as a=α and b=β, highlighted structures defined as binding glycans by z-score with p-values <0.15

| Chart Number | Glycan Structure                                                                                                               | Gal-8 50 µg/ml<br>50972 |      | Gal-8 5 µg/ml<br>881 |      | AVG Rank | p-values  |
|--------------|--------------------------------------------------------------------------------------------------------------------------------|-------------------------|------|----------------------|------|----------|-----------|
|              |                                                                                                                                | Ave RFU                 | Rank | Ave RFU              | Rank |          |           |
| 162          | Galb1-4GlcNAcb1-3Galb1-4Glc-Sp8                                                                                                | 36724                   | 72   | 881                  | 100  | 86       | 0.0003091 |
| 86           | GalNAca1-3(Fuca1-2)Galb1-4Glc-Sp0                                                                                              | 39555                   | 78   | 596                  | 68   | 73       | 0.000116  |
| 332          | GalNAca1-3(Fuca1-2)Galb1-4GlcNAcb1-3Galb1-4GlcNAcb-Sp0                                                                         | 37356                   | 73   | 559                  | 63   | 68       | 0.0002752 |
| 367          | GalNAca1-3(Fuca1-2)Galb1-4GlcNAcb1-2Mana1-3(GalNAca1-3(Fuca1-2)Galb1-4GlcNAcb1-2Mana1-6)Manb1-4GlcNAcb1-4GlcNAcb-Sp20          | 50972                   | 100  | 303                  | 34   | 67       | 7.65E-07  |
| 368          | Gala1-3(Fuca1-2)Galb1-4GlcNAcb1-2Mana1-3(Gala1-3(Fuca1-2)Galb1-4GlcNAcb1-2Mana1-6)Manb1-4GlcNAcb1-4GlcNAcb-Sp20                | 37256                   | 73   | 420                  | 48   | 60       | 0.000301  |
| 85           | GalNAca1-3(Fuca1-2)Galb1-4GlcNAcb-Sp8                                                                                          | 37082                   | 73   | 408                  | 46   | 60       | 0.0003226 |
| 26           | [3OSO3]Galb1-4[6OSO3]Glc-Sp8                                                                                                   | 20864                   | 41   | 683                  | 78   | 59       | 0.0360847 |
| 333          | GalNAca1-3(Fuca1-2)Galb1-4GlcNAcb1-3Galb1-4GlcNAcb-Sp0                                                                         | 37959                   | 74   | 375                  | 43   | 59       | 0.000235  |
| 370          | GalNAca1-3(Fuca1-2)Galb1-3GlcNAcb1-2Mana1-3(GalNAca1-3(Fuca1-2)Galb1-3GlcNAcb1-2Mana1-6)Manb1-4GlcNAcb1-4GlcNAcb-Sp20          | 43390                   | 85   | 256                  | 29   | 57       | 2.73E-05  |
| 378          | Galb1-3GalNAca1-3(Fuca1-2)Galb1-4GlcNAcb-Sp0                                                                                   | 44767                   | 88   | 178                  | 20   | 54       | 1.55E-05  |
| 290          | Galb1-4GlcNAcb1-3Galb1-3GlcNAcb-Sp0                                                                                            | 31780                   | 62   | 382                  | 43   | 53       | 0.0020358 |
| 104          | Gala1-3(Fuca1-2)Galb1-4GlcNAcb-Sp0                                                                                             | 33722                   | 66   | 248                  | 28   | 47       | 0.0011231 |
| 161          | Galb1-4GlcNAcb1-3Galb1-4Glc-Sp0                                                                                                | 36274                   | 71   | 203                  | 23   | 47       | 0.0004676 |
| 101          | Gala1-3(Fuca1-2)Galb1-3GlcNAcb-Sp8                                                                                             | 37443                   | 73   | 178                  | 20   | 47       | 0.0003072 |
| 424          | Gala1-3(Fuca1-2)Galb1-4GlcNAcb1-2Mana1-3(Gala1-3(Fuca1-2)Galb1-4GlcNAcb1-2Mana1-6)Manb1-4GlcNAcb1-4(Fuca1-6)GlcNAcb-Sp22       | 43643                   | 86   | 58                   | 7    | 46       | 2.67E-05  |
| 105          | Gala1-3(Fuca1-2)Galb1-4Glc-Sp0                                                                                                 | 32214                   | 63   | 256                  | 29   | 46       | 0.0018437 |
| 390          | GalNAca1-3(Fuca1-2)Galb1-3GalNAca1-3(Fuca1-2)Galb1-4GlcNAcb-Sp0                                                                | 36896                   | 72   | 173                  | 20   | 46       | 0.0003768 |
| 360          | Gala1-3Galb1-4GlcNAcb1-2Mana1-3(Gala1-3Galb1-4GlcNAcb1-2Mana1-6)Manb1-4GlcNAcb1-4GlcNAcb-Sp20                                  | 43593                   | 86   | 16                   | 2    | 44       | 2.77E-05  |
| 386          | Fuca1-2Galb1-3GalNAca1-3(Fuca1-2)Galb1-4Glc-Sp0                                                                                | 42650                   | 84   | 29                   | 3    | 44       | 4.12E-05  |
| 338          | GlcNAca1-4Galb1-4GlcNAcb1-3Galb1-4Glc-Sp0                                                                                      | 34202                   | 67   | 166                  | 19   | 43       | 0.0009812 |
| 377          | Galb1-3GalNAca1-3(Fuca1-2)Galb1-4Glc-Sp0                                                                                       | 39922                   | 78   | 50                   | 6    | 42       | 0.0001246 |
| 81           | GalNAca1-3(Fuca1-2)Galb1-3GlcNAcb-Sp0                                                                                          | 36324                   | 71   | 104                  | 12   | 42       | 0.0004759 |
| 457          | GalNAca1-3(Fuca1-2)Galb1-3GlcNAcb1-2Mana1-6(GalNAca1-3(Fuca1-2)Galb1-3GlcNAcb1-2Mana1-3)Manb1-4GlcNAcb1-4(Fuca1-6)GlcNAcb-Sp22 | 40126                   | 79   | 32                   | 4    | 41       | 0.0001157 |
| 387          | Fuca1-2Galb1-3GalNAca1-3(Fuca1-2)Galb1-4GlcNAcb-Sp0                                                                            | 40180                   | 79   | 20                   | 2    | 41       | 0.0001138 |
| 327          | Neu5Aca2-6Galb1-4GlcNAcb1-3Galb1-3GlcNAcb-Sp0                                                                                  | 34584                   | 68   | 106                  | 12   | 40       | 0.0008786 |
| 84           | GalNAca1-3(Fuca1-2)Galb1-4GlcNAcb-Sp0                                                                                          | 36585                   | 72   | 69                   | 8    | 40       | 0.0004385 |
| 25           | [3OSO3]Galb1-4[6OSO3]Glc-Sp0                                                                                                   | 23080                   | 45   | 284                  | 32   | 39       | 0.023741  |
| 331          | GalNAcb1-3Gala1-4Galb1-4GlcNAcb1-3Galb1-4Glc-Sp0                                                                               | 36480                   | 72   | 13                   | 1    | 37       | 0.0004649 |
| 454          | GalNAca1-3(Fuca1-2)Galb1-4GlcNAcb1-2Mana1-6(GalNAca1-3(Fuca1-2)Galb1-4GlcNAcb1-2Mana1-3)Manb1-4GlcNAcb1-4(Fuca1-6)GlcNAcb-Sp22 | 34525                   | 68   | 42                   | 5    | 36       | 0.0009166 |
| 410          | Gala1-3(Fuca1-2)Galb1-4GlcNAcb1-3GalNAca-Sp14                                                                                  | 34427                   | 68   | 36                   | 4    | 36       | 0.0009498 |
| 160          | Galb1-4GlcNAcb1-3Galb1-4GlcNAcb-Sp0                                                                                            | 32994                   | 65   | 31                   | 4    | 34       | 0.0015386 |
| 451          | GalNAca1-3Fuca1-2Galb1-4GlcNAcb1-3(GalNAca1-3Fuca1-2Galb1-4GlcNAcb1-6)GalNAcb-Sp14                                             | 39367                   | 77   | -81                  | -9   | 34       | 0.000163  |
| 329          | Neu5Aca2-6Galb1-4GlcNAcb1-3Galb1-4GlcNAcb1-3Galb1-4GlcNAcb-Sp0                                                                 | 32412                   | 64   | 18                   | 2    | 33       | 0.0018677 |
| 450          | Gala1-3Fuca1-2Galb1-4GlcNAcb1-3(Gala1-3Fuca1-2Galb1-4GlcNAcb1-6)GalNAcb-Sp14                                                   | 32387                   | 64   | 18                   | 2    | 33       | 0.0018828 |
| 340          | GlcNAca1-4Galb1-4GlcNAcb1-3Galb1-4GlcNAcb-Sp0                                                                                  | 29392                   | 58   | 65                   | 7    | 33       | 0.0046783 |
| 154          | Galb1-4GalNAca1-3(Fuca1-2)Galb1-4GlcNAcb-Sp8                                                                                   | 31987                   | 63   | 16                   | 2    | 32       | 0.0021419 |
| 455          | Gala1-3(Fuca1-2)Galb1-3GlcNAcb1-2Mana1-6(Gala1-3(Fuca1-2)Galb1-3GlcNAcb1-2Mana1-3)Manb1-4GlcNAcb1-4(Fuca1-6)GlcNAcb-Sp22       | 28148                   | 55   | 54                   | 6    | 31       | 0.0067235 |
| 180          | GlcNAcb1-3Galb1-4GlcNAcb1-3Galb1-4GlcNAcb-Sp0                                                                                  | 29823                   | 59   | 7                    | 1    | 30       | 0.0041883 |
| 291          | Neu5Aca2-3Galb1-3GlcNAcb1-3Galb1-3GlcNAcb-Sp0                                                                                  | 21693                   | 43   | 97                   | 11   | 27       | 0.0341785 |
| 330          | Gala1-4Galb1-4GlcNAcb1-3Galb1-4Glc-Sp0                                                                                         | 22095                   | 43   | 48                   | 5    | 24       | 0.0315576 |
| 73           | Fuca1-2Galb1-4GlcNAcb1-3Galb1-4GlcNAcb1-3Galb1-4GlcNAcb-Sp0                                                                    | 23913                   | 47   | 9                    | 1    | 24       | 0.020752  |
| 411          | GalNAca1-3(Fuca1-2)Galb1-4GlcNAcb1-3GalNAca-Sp14                                                                               | 20805                   | 41   | 11                   | 1    | 21       | 0.0423493 |
| 493          | (Fuca1-2)Galb1-3[6OSO3]GlcNAcb-Sp0                                                                                             | 18723                   | 37   | 44                   | 5    | 21       | 0.0646789 |
| 159          | Galb1-4GlcNAcb1-3Galb1-4GlcNAcb1-3Galb1-4GlcNAcb-Sp0                                                                           | 19372                   | 38   | 8                    | 1    | 19       | 0.0572035 |
| 273          | Neu5Aca2-8Neu5Aca2-3Galb1-4Glc-Sp0                                                                                             | 15786                   | 31   | 19                   | 2    | 17       | 0.1118386 |

|     |                                                                                                                       |       |    |     |    |    |           |
|-----|-----------------------------------------------------------------------------------------------------------------------|-------|----|-----|----|----|-----------|
| 72  | Fuca1-2Galb1-4GlcNAcb1-3Galb1-4GlcNAcb-Sp0                                                                            | 15725 | 31 | 8   | 1  | 16 | 0.1132316 |
| 260 | Neu5Aca2-3Galb1-4Glc-Sp0                                                                                              | 7203  | 14 | 152 | 17 | 16 | 0.3588823 |
| 286 | Galb1-3GlcNAcb1-3Galb1-3GlcNAcb-Sp0                                                                                   | 13512 | 27 | 13  | 1  | 14 | 0.1620635 |
| 421 | GalNAca1-3(Fuca1-2)Galb1-3GlcNAcb1-3GalNAc-Sp14                                                                       | 10469 | 21 | 64  | 7  | 14 | 0.2472578 |
| 398 | GalNAca1-3GalNAcb1-3Gala1-4Galb1-4GlcNAcb-Sp0                                                                         | 13371 | 26 | 10  | 1  | 14 | 0.1656656 |
| 502 | Galb1-3GlcNAca1-3Galb1-4GlcNAcb-Sp8                                                                                   | 12940 | 25 | 4   | 0  | 13 | 0.1769113 |
| 358 | Fuca1-2Galb1-4GlcNAcb1-2Mana1-3(Fuca1-2Galb1-4GlcNAcb1-2Mana1-6)Manb1-4GlcNAcb1-4GlcNAcb-Sp20                         | 11545 | 23 | 15  | 2  | 12 | 0.2156107 |
| 244 | Neu5Aca2-3Galb1-3GlcNAcb1-3Galb1-4GlcNAcb-Sp0                                                                         | 11335 | 22 | 16  | 2  | 12 | 0.2218539 |
| 64  | Fuca1-2Galb1-3GlcNAcb1-3Galb1-4Glc-Sp8                                                                                | 11868 | 23 | 6   | 1  | 12 | 0.206425  |
| 335 | GlcNAca1-4Galb1-4GlcNAcb1-3Galb1-4GlcNAcb1-3Galb1-4GlcNAcb-Sp0                                                        | 9923  | 19 | 31  | 4  | 12 | 0.2661383 |
| 420 | Gala1-3(Fuca1-2)Galb1-3GlcNAcb1-3GalNAc-Sp14                                                                          | 11039 | 22 | 4   | 0  | 11 | 0.2312399 |
| 426 | Fuca1-2Galb1-3GlcNAcb1-3(Galb1-4GlcNAcb1-6)Galb1-4Glc-Sp21                                                            | 10102 | 20 | 17  | 2  | 11 | 0.2606844 |
| 412 | GalNAca1-3GalNAcb1-3Gala1-4Galb1-4Glc-Sp0                                                                             | 10590 | 21 | 6   | 1  | 11 | 0.2452476 |
| 100 | Gala1-3(Fuca1-2)Galb1-3GlcNAcb-Sp0                                                                                    | 3781  | 7  | 112 | 13 | 10 | 0.4956103 |
| 65  | Fuca1-2Galb1-3GlcNAcb1-3Galb1-4Glc-Sp10                                                                               | 9465  | 19 | 9   | 1  | 10 | 0.2823258 |
| 199 | GlcAb-Sp8                                                                                                             | 196   | 0  | 168 | 19 | 10 | 0.6354125 |
| 66  | Fuca1-2Galb1-3GlcNAcb-Sp0                                                                                             | 8769  | 17 | 11  | 1  | 9  | 0.3065354 |
| 114 | Gala1-3Galb1-4GlcNAcb-Sp8                                                                                             | 8684  | 17 | 8   | 1  | 9  | 0.3096696 |
| 433 | Galb1-4GlcNAcb1-4(Galb1-4GlcNAcb1-2)Mana1-3(GlcNAcb1-4)(Galb1-4GlcNAcb1-2Mana1-6)Manb1-4GlcNAcb1-4GlcNAc-Sp21         | 874   | 2  | 137 | 16 | 9  | 0.6105412 |
| 113 | Gala1-3Galb1-3GlcNAcb-Sp0                                                                                             | 7986  | 16 | 12  | 1  | 9  | 0.3348585 |
| 212 | Mana1-6(Mana1-3)Mana1-6(Mana1-2Mana1-3)Manb1-4GlcNAcb1-4GlcNAcb-Sp12                                                  | 484   | 1  | 137 | 16 | 8  | 0.6255947 |
| 461 | Gala1-3(Fuca1-2)Galb1-3GalNAcb-Sp8                                                                                    | 6655  | 13 | 25  | 3  | 8  | 0.384715  |
| 371 | Gala1-3(Fuca1-2)Galb1-3GlcNAcb1-2Mana1-3(Gala1-3(Fuca1-2)Galb1-3GlcNAcb1-2Mana1-6)Manb1-4GlcNAcb1-4GlcNAcb-Sp20       | 4374  | 9  | 65  | 7  | 8  | 0.4735803 |
| 278 | Neu5Gca2-3Galb1-3GlcNAcb-Sp0                                                                                          | 6980  | 14 | 19  | 2  | 8  | 0.3724348 |
| 456 | Neu5Aca2-6Galb1-4GlcNAcb1-6(Fuca1-2Galb1-3GlcNAcb1-3)Galb-4Glc-Sp21                                                   | 7146  | 14 | 13  | 2  | 8  | 0.3663231 |
| 384 | Galb1-4GlcNAcb1-2(Galb1-4GlcNAcb1-4)Mana1-3(Galb1-4GlcNAcb1-2(Galb1-4GlcNAcb1-6)Mana1-6)Manb1-4GlcNAcb1-4GlcNAcb-Sp21 | 6840  | 13 | 14  | 2  | 8  | 0.3780015 |
| 255 | Neu5Aca2-3Galb1-4GlcNAcb1-3Galb1-4GlcNAcb1-3Galb1-4GlcNAcb-Sp0                                                        | 7161  | 14 | 5   | 1  | 7  | 0.3660564 |
| 379 | Galb1-3GlcNAcb1-3(Galb1-3GlcNAcb1-3Galb1-4GlcNAcb1-6)Galb1-4Glc-Sp0                                                   | 9555  | 19 | -40 | -4 | 7  | 0.2809249 |
| 365 | Fuca1-2Galb1-3GlcNAcb1-3(Galb1-4(Fuca1-3)GlcNAcb1-6)Galb1-4Glc-Sp21                                                   | 6010  | 12 | 19  | 2  | 7  | 0.4101254 |
| 268 | Neu5Aca2-6Galb1-4GlcNAcb1-3Galb1-4GlcNAcb-Sp0                                                                         | 6514  | 13 | 7   | 1  | 7  | 0.3908803 |
| 261 | Neu5Aca2-3Galb1-4Glc-Sp8                                                                                              | 6945  | 14 | -1  | 0  | 7  | 0.3745432 |
| 436 | Gala1-3Galb1-4Glc-Sp10                                                                                                | 6128  | 12 | 13  | 1  | 7  | 0.4057235 |
| 115 | Gala1-3Galb1-4Glc-Sp0                                                                                                 | 5934  | 12 | 14  | 2  | 7  | 0.4133161 |
| 401 | Gala1-3Galb1-4GlcNAcb1-3GalNAc-Sp14                                                                                   | 6663  | 13 | 0   | 0  | 7  | 0.3853729 |
| 239 | Neu5Aca2-3Galb1-3[6OSO3]GalNAca-Sp8                                                                                   | 5696  | 11 | 14  | 2  | 6  | 0.4227234 |
| 460 | Gala1-3(Fuca1-2)Galb1-3GalNAca-Sp8                                                                                    | 4554  | 9  | 29  | 3  | 6  | 0.4677808 |
| 67  | Fuca1-2Galb1-3GlcNAcb-Sp8                                                                                             | 5796  | 11 | 3   | 0  | 6  | 0.4192001 |
| 357 | Fuca1-2Galb1-3GlcNAcb1-2Mana1-3(Fuca1-2Galb1-3GlcNAcb1-2Mana1-6)Manb1-4GlcNAcb1-4GlcNAcb-Sp20                         | 4498  | 9  | 24  | 3  | 6  | 0.4702368 |
| 246 | Neu5Aca2-3Galb1-3GlcNAcb-Sp0                                                                                          | 1744  | 3  | 69  | 8  | 6  | 0.5790824 |
| 415 | GalNAca1-3(Fuca1-2)Galb1-4(Fuca1-3)GlcNAcb1-3GalNAc-Sp14                                                              | 675   | 1  | 86  | 10 | 6  | 0.6202115 |
| 389 | Neu5Aca2-3(GalNAcb1-4)Galb1-4GlcNAcb1-3GalNAca-Sp14                                                                   | 555   | 1  | 82  | 9  | 5  | 0.6249807 |
| 202 | KDNa2-3Galb1-3GlcNAcb-Sp0                                                                                             | 2968  | 6  | 39  | 4  | 5  | 0.5313575 |
| 395 | Neu5Aca2-3Galb1-3GlcNAcb1-3GalNAca-Sp14                                                                               | 2248  | 4  | 50  | 6  | 5  | 0.559796  |
| 326 | Neu5Ac(9Ac)2-3Galb1-3GlcNAcb-Sp0                                                                                      | 4786  | 9  | 6   | 1  | 5  | 0.4593761 |
| 372 | Fuca1-2Galb1-3(Fuca1-4)GlcNAcb1-2Mana1-3(Fuca1-2Galb1-3(Fuca1-4)GlcNAcb1-2Mana1-6)Manb1-4GlcNAcb1-4GlcNAcb-Sp19       | 358   | 1  | 82  | 9  | 5  | 0.6325181 |
| 235 | Neu5Aca2-3Galb1-3[6OSO3]GlcNAc-Sp8                                                                                    | 1704  | 3  | 55  | 6  | 5  | 0.5812189 |
| 145 | Galb1-3GlcNAcb1-3Galb1-4Glc-Sp10                                                                                      | 4180  | 8  | 6   | 1  | 4  | 0.4837824 |
| 413 | Fuca1-2Galb1-4(Fuca1-3)GlcNAcb1-3GalNAca-Sp14                                                                         | 1335  | 3  | 54  | 6  | 4  | 0.5957906 |
| 339 | GlcNAca1-4Galb1-4GlcNAcb1-3Galb1-4(Fuca1-3)GlcNAcb1-3Galb1-4(Fuca1-3)GlcNAcb-Sp0                                      | 512   | 1  | 65  | 7  | 4  | 0.6272815 |

|     |                                                                                                                                                    |      |   |    |   |   |           |
|-----|----------------------------------------------------------------------------------------------------------------------------------------------------|------|---|----|---|---|-----------|
| 30  | [3OSO3]Galb1-3GlcNAcb-Sp8                                                                                                                          | 3198 | 6 | 15 | 2 | 4 | 0.523058  |
| 425 | Galb1-3GlcNAcb1-2Mana1-3(Galb1-3GlcNAcb1-2(Galb1-3GlcNAcb1-6)Mana1-6)Manb1-4GlcNAcb1-4GlcNAcb-Sp19                                                 | 3802 | 7 | 4  | 0 | 4 | 0.4991236 |
| 24  | [3OSO3]Galb1-4Glc-Sp8                                                                                                                              | 3291 | 6 | 11 | 1 | 4 | 0.519469  |
| 231 | Neu5Aca2-3(Neu5Aca2-3Galb1-3GalNAcb1-4)Galb1-4Glc-Sp0                                                                                              | 3340 | 7 | 10 | 1 | 4 | 0.5175327 |
| 28  | [3OSO3]Galb1-3GalNAca-Sp8                                                                                                                          | 2222 | 4 | 28 | 3 | 4 | 0.5617119 |
| 348 | Galb1-4GlcNAcb1-2Mana1-3(Mana1-6)Manb1-4GlcNAcb1-4GlcNAcb-Sp12                                                                                     | 397  | 1 | 60 | 7 | 4 | 0.6318696 |
| 281 | Neu5Gca2-3Galb1-4Glc-Sp0                                                                                                                           | 2397 | 5 | 18 | 2 | 3 | 0.5551203 |
| 297 | Galb1-3Galb1-4GlcNAcb-Sp8                                                                                                                          | 2874 | 6 | 7  | 1 | 3 | 0.5364274 |
| 447 | Galb1-4(Fuca1-3)GlcNAcb1-6GalNAc-Sp14                                                                                                              | 489  | 1 | 48 | 5 | 3 | 0.6288129 |
| 209 | Mana1-2Mana1-2Mana1-3(Mana1-2Mana1-3(Mana1-2Mana1-6)Mana1-6)Manb1-4GlcNAcb1-4GlcNAcb-Sp12                                                          | 100  | 0 | 54 | 6 | 3 | 0.6433697 |
| 503 | Galb1-3[6OSO3]GlcNAcb-Sp8                                                                                                                          | 1315 | 3 | 33 | 4 | 3 | 0.5973976 |
| 29  | [3OSO3]Galb1-3GlcNAcb-Sp0                                                                                                                          | 2200 | 4 | 17 | 2 | 3 | 0.5630282 |
| 220 | Neu5Aca2-3Galb1-3GalNAca-Sp8                                                                                                                       | 2096 | 4 | 10 | 1 | 3 | 0.5674506 |
| 128 | Galb1-3(Fuca1-4)GlcNAc-Sp8                                                                                                                         | 340  | 1 | 39 | 4 | 3 | 0.6348418 |
| 478 | Galb1-4GlcNAcb1-6(Galb1-4GlcNAcb1-2)Mana1-6(Galb1-4GlcNAcb1-2Mana1-3)Manb1-4GlcNAcb1-4(Fuca1-6)GlcNAcb-6AA                                         | 761  | 1 | 31 | 3 | 2 | 0.6190163 |
| 349 | GlcNAcb1-2Mana1-3(GlcNAcb1-2Mana1-6)Manb1-4GlcNAcb1-4(Fuca1-6)GlcNAcb-Sp22                                                                         | 673  | 1 | 32 | 4 | 2 | 0.6223677 |
| 142 | Galb1-3GalNAcb1-4Galb1-4Glc-Sp8                                                                                                                    | 212  | 0 | 38 | 4 | 2 | 0.6397396 |
| 102 | Gala1-3(Fuca1-2)Galb1-4(Fuca1-3)GlcNAcb-Sp0                                                                                                        | 840  | 2 | 27 | 3 | 2 | 0.6161201 |
| 10  | Neu5Aca-Sp11                                                                                                                                       | 45   | 0 | 41 | 5 | 2 | 0.6459332 |
| 392 | Gala1-3Galb1-3(Fuca1-4)GlcNAcb1-2Mana1-3(Gala1-3Galb1-3(Fuca1-4)GlcNAcb1-2Mana1-6)Manb1-4GlcNAcb1-4GlcNAc-Sp19                                     | 672  | 1 | 30 | 3 | 2 | 0.6224831 |
| 494 | [6OSO3](Fuca1-2)Galb1-3[6OSO3]GlcNAcb-Sp0                                                                                                          | 270  | 1 | 35 | 4 | 2 | 0.6376542 |
| 126 | Galb1-3(Fuca1-4)GlcNAcb-Sp0                                                                                                                        | 1292 | 3 | 18 | 2 | 2 | 0.5988855 |
| 483 | Galb1-3(Fuca1-4)GlcNAcb1-6GalNAca-Sp14                                                                                                             | 265  | 1 | 35 | 4 | 2 | 0.6378439 |
| 223 | Neu5Aca2-8Neu5Aca2-8Neu5Aca2-3(GalNAcb1-4)Galb1-4Glc-Sp0                                                                                           | 82   | 0 | 36 | 4 | 2 | 0.6447277 |
| 170 | GlcNAca1-3Galb1-4GlcNAcb-Sp8                                                                                                                       | 1874 | 4 | 5  | 1 | 2 | 0.5764679 |
| 359 | Fuca1-2Galb1-4(Fuca1-3)GlcNAcb1-2Mana1-3(Fuca1-2Galb1-4(Fuca1-3)GlcNAcb1-2Mana1-6)Manb1-4GlcNAcb1-4GlcNAcb-Sp20                                    | 188  | 0 | 34 | 4 | 2 | 0.6407997 |
| 471 | Neu5Aca2-3Galb1-4GlcNAcb1-2Mana-Sp0                                                                                                                | 493  | 1 | 28 | 3 | 2 | 0.6294249 |
| 241 | Neu5Aca2-3Galb1-3(Neu5Aca2-6)GalNAca-Sp14                                                                                                          | 1157 | 2 | 16 | 2 | 2 | 0.6042377 |
| 269 | Neu5Aca2-6Galb1-4Glc-Sp0                                                                                                                           | 1370 | 3 | 13 | 1 | 2 | 0.5960259 |
| 369 | Gala1-3Galb1-4(Fuca1-3)GlcNAcb1-2Mana1-3(Gala1-3Galb1-4(Fuca1-3)GlcNAcb1-2Mana1-6)Manb1-4GlcNAcb1-4GlcNAcb-Sp20                                    | 592  | 1 | 26 | 3 | 2 | 0.6257098 |
| 499 | GalNAca1-3(Fuca1-2)Galb1-3GlcNAcb1-6GalNAca-Sp14                                                                                                   | 1250 | 2 | 14 | 2 | 2 | 0.6006847 |
| 147 | Galb1-3GlcNAcb-Sp8                                                                                                                                 | 90   | 0 | 32 | 4 | 2 | 0.6445769 |
| 334 | Neu5Aca2-3-Galb1-3(Galb1-4(Fuca1-3)GlcNAcb1-6)GalNAc-Sp14                                                                                          | 977  | 2 | 17 | 2 | 2 | 0.611201  |
| 484 | Neu5Aca2-3Galb1-3GlcNAcb1-6GalNAca-Sp14                                                                                                            | 194  | 0 | 30 | 3 | 2 | 0.640724  |
| 400 | Gala1-4Galb1-4GlcNAcb1-2Mana1-3(Gala1-4Galb1-4GlcNAcb1-2Mana1-6)Manb1-4GlcNAcb1-4GlcNAcb-LVaNKT                                                    | 464  | 1 | 25 | 3 | 2 | 0.6306479 |
| 498 | (Fuca1-2)Galb1-3GlcNAcb1-6(Fuca1-2Galb1-3GlcNAcb1-3)GalNAca-Sp14                                                                                   | 503  | 1 | 24 | 3 | 2 | 0.6291955 |
| 254 | Neu5Aca2-3Galb1-4(Fuca1-3)GlcNAcb1-3Galb1-4GlcNAcb-Sp8                                                                                             | 255  | 1 | 28 | 3 | 2 | 0.6384888 |
| 488 | Gala1-3Galb1-4GlcNAcb1-6GalNAca-Sp14                                                                                                               | 1156 | 2 | 11 | 1 | 2 | 0.6044716 |
| 397 | Galb1-4(Fuca1-3)GlcNAcb1-3GalNAca-Sp14                                                                                                             | 453  | 1 | 23 | 3 | 2 | 0.6311444 |
| 374 | Neu5Aca2-6Galb1-4GlcNAcb1-3GalNAc-Sp14                                                                                                             | 954  | 2 | 14 | 2 | 2 | 0.6122096 |
| 444 | Fuca1-2Galb1-4(Fuca1-3)GlcNAcb1-2(Fuca1-2Galb1-4(Fuca1-3)GlcNAcb1-4)Mana1-3(Fuca1-2Galb1-4(Fuca1-3)GlcNAcb1-2Mana1-6)Manb1-4GlcNAcb1-4GlcNAcb-Sp12 | 481  | 1 | 22 | 3 | 2 | 0.630113  |
| 465 | Fuca1-2Galb1-4(Fuca1-3)GlcNAcb1-2Mana1-6(Fuca1-2Galb1-4(Fuca1-3)GlcNAcb1-2Mana1-3)Manb1-4GlcNAcb1-4(Fuca1-6)GlcNAcb-6AA                            | 203  | 0 | 26 | 3 | 2 | 0.6405348 |
| 133 | Galb1-3(Neu5Aca2-6)GalNAca-Sp14                                                                                                                    | 45   | 0 | 29 | 3 | 2 | 0.6463849 |
| 250 | Neu5Aca2-3Galb1-4(Fuca1-3)GlcNAcb1-3Galb1-4(Fuca1-3)GlcNAcb1-3Galb1-4(Fuca1-3)GlcNAcb-Sp0                                                          | 130  | 0 | 27 | 3 | 2 | 0.6432565 |
| 247 | Neu5Aca2-3Galb1-3GlcNAcb-Sp8                                                                                                                       | 336  | 1 | 23 | 3 | 2 | 0.6356026 |
| 362 | Galb1-3(Fuca1-4)GlcNAcb1-2Mana1-3(Galb1-3(Fuca1-4)GlcNAcb1-2Mana1-6)Manb1-4GlcNAcb1-4(Fuca1-6)GlcNAcb-Sp22                                         | 309  | 1 | 23 | 3 | 2 | 0.6366289 |
| 429 | GlcNAcb1-4(GlcNAcb1-2)Mana1-3(GlcNAcb1-4)(GlcNAcb1-2Mana1-6)Manb1-4GlcNAcb1-4GlcNAc-Sp21                                                           | 42   | 0 | 28 | 3 | 2 | 0.6465354 |
| 82  | GalNAca1-3(Fuca1-2)Galb1-4(Fuca1-3)GlcNAcb-Sp0                                                                                                     | 221  | 0 | 24 | 3 | 2 | 0.639929  |
| 23  | [3OSO3]Galb1-4(Fuca1-3)[6OSO3]Glc-Sp0                                                                                                              | 411  | 1 | 20 | 2 | 2 | 0.6328612 |

|     |                                                                                                                          |      |   |    |   |   |           |
|-----|--------------------------------------------------------------------------------------------------------------------------|------|---|----|---|---|-----------|
| 356 | KDNa2-3Galb1-3GalNAca-Sp14                                                                                               | 448  | 1 | 20 | 2 | 2 | 0.6314498 |
| 54  | Neu5Aca2-6Galb1-4GlcNAcb1-2Mana1-3(Neu5Aca2-6Galb1-4GlcNAcb1-2Mana1-6)Manb1-4GlcNAcb1-4GlcNAcb-N(LT)AVL                  | 163  | 0 | 24 | 3 | 2 | 0.6421233 |
| 288 | Galb1-4(Fuca1-3)[6OSO3]Glc-Sp0                                                                                           | 597  | 1 | 16 | 2 | 2 | 0.6259016 |
| 59  | Fuca1-2Galb1-3(Fuca1-4)GlcNAcb-Sp8                                                                                       | 272  | 1 | 22 | 2 | 1 | 0.6380716 |
| 383 | Galb1-3GlcNAcb1-3(Galb1-3GlcNAcb1-3Galb1-4(Fuca1-3)GlcNAcb1-6)Galb1-4Glc-Sp21                                            | 435  | 1 | 19 | 2 | 1 | 0.6319841 |
| 91  | GalNAca1-3Galb-Sp8                                                                                                       | 793  | 2 | 12 | 1 | 1 | 0.6185148 |
| 222 | Neu5Aca2-8Neu5Aca2-8Neu5Aca2-8Neu5Aca2-3(GalNAcb1-4)Galb1-4Glc-Sp0                                                       | 232  | 0 | 22 | 2 | 1 | 0.6395881 |
| 325 | Neu5Ac(9Ac)a2-3Galb1-4GlcNAcb-Sp0                                                                                        | 121  | 0 | 23 | 3 | 1 | 0.6437471 |
| 446 | Galb1-4GlcNAcb1-6GalNAc-Sp14                                                                                             | 693  | 1 | 13 | 2 | 1 | 0.6223292 |
| 422 | Gala1-3Galb1-3GlcNAcb1-3GalNAc-Sp14                                                                                      | 507  | 1 | 16 | 2 | 1 | 0.6293484 |
| 259 | Fuca1-2Galb1-4[6OSO3]Glc-Sp0                                                                                             | 189  | 0 | 21 | 2 | 1 | 0.6412537 |
| 144 | Galb1-3GlcNAcb1-3Galb1-4GlcNAcb-Sp0                                                                                      | 1383 | 3 | 1  | 0 | 1 | 0.5959867 |
| 108 | Gala1-3(Gala1-4)Galb1-4GlcNAcb-Sp8                                                                                       | 132  | 0 | 22 | 3 | 1 | 0.6433697 |
| 318 | Neu5Aca2-8Neu5Acb-Sp17                                                                                                   | 72   | 0 | 23 | 3 | 1 | 0.6455943 |
| 216 | [3OSO3]Galb1-4(Fuca1-3)[6OSO3]GlcNAc-Sp8                                                                                 | 440  | 1 | 16 | 2 | 1 | 0.6319077 |
| 243 | Neu5Aca2-3Galb1-3GalNAcb1-3Gala1-4Galb1-4Glc-Sp0                                                                         | 1037 | 2 | 5  | 1 | 1 | 0.6093725 |
| 296 | Galb1-3(Neu5Aca2-3Galb1-4(Fuca1-3)GlcNAcb1-6)GalNAca-Sp14                                                                | 678  | 1 | 12 | 1 | 1 | 0.6229445 |
| 163 | Galb1-4GlcNAcb1-6(Galb1-3)GalNAca-Sp8                                                                                    | 111  | 0 | 21 | 2 | 1 | 0.6441998 |
| 125 | Galb1-3(Fuca1-4)GlcNAcb1-3Galb1-4GlcNAcb-Sp0                                                                             | 338  | 1 | 17 | 2 | 1 | 0.6357547 |
| 98  | GalNAcb1-4GlcNAcb-Sp8                                                                                                    | 200  | 0 | 19 | 2 | 1 | 0.6409132 |
| 448 | Galb1-4GlcNAcb1-2Mana-Sp0                                                                                                | 265  | 1 | 18 | 2 | 1 | 0.6384888 |
| 110 | Gala1-3GalNAca-Sp16                                                                                                      | 79   | 0 | 21 | 2 | 1 | 0.645406  |
| 453 | GalNAcb1-4Galb1-4Glc-Sp0                                                                                                 | 43   | 0 | 21 | 2 | 1 | 0.6467612 |
| 399 | Gala1-4Galb1-3GlcNAcb1-2Mana1-3(Gala1-4Galb1-3GlcNAcb1-2Mana1-6)Manb1-4GlcNAcb1-4GlcNAcb-Sp19                            | 469  | 1 | 14 | 2 | 1 | 0.6308771 |
| 321 | Galb1-3GlcNAcb1-2Mana1-3(Galb1-3GlcNAcb1-2Mana1-6)Manb1-4GlcNAcb1-4GlcNAcb-Sp19                                          | 612  | 1 | 11 | 1 | 1 | 0.6255179 |
| 391 | Gala1-3Galb1-3GlcNAcb1-2Mana1-3(Gala1-3Galb1-3GlcNAcb1-2Mana1-6)Manb1-4GlcNAcb1-4GlcNAcb-Sp19                            | 239  | 0 | 17 | 2 | 1 | 0.6395123 |
| 437 | Galb1-4Galb-Sp10                                                                                                         | 53   | 0 | 20 | 2 | 1 | 0.6464226 |
| 94  | GalNAcb1-3(Fuca1-2)Galb-Sp8                                                                                              | 179  | 0 | 18 | 2 | 1 | 0.6417453 |
| 33  | [3OSO3]Galb1-4[6OSO3]GlcNAcb-Sp0                                                                                         | 588  | 1 | 11 | 1 | 1 | 0.6264384 |
| 468 | GlcNAcb1-6(GlcNAcb1-2)Mana1-6(GlcNAcb1-2Mana1-3)Manb1-4GlcNAcb1-4(Fuca1-6)GlcNAcb-6AA                                    | 95   | 0 | 19 | 2 | 1 | 0.6448785 |
| 179 | GlcNAcb1-3Galb1-4GlcNAcb-Sp8                                                                                             | 334  | 1 | 15 | 2 | 1 | 0.6359828 |
| 265 | Neu5Aca2-6Galb1-4GlcNAcb-Sp0                                                                                             | 77   | 0 | 19 | 2 | 1 | 0.6455566 |
| 469 | Galb1-3GlcNAcb1-2Mana1-6(GlcNAcb1-4)(Galb1-3GlcNAcb1-2Mana1-3)Manb1-4GlcNAcb1-4GlcNAcb-Sp21                              | 407  | 1 | 13 | 2 | 1 | 0.6332805 |
| 287 | Galb1-4(Fuca1-3)[6OSO3]GlcNAc-Sp0                                                                                        | 274  | 1 | 15 | 2 | 1 | 0.6382613 |
| 173 | GlcNAcb1-3(GlcNAcb1-6)GalNAca-Sp8                                                                                        | 39   | 0 | 19 | 2 | 1 | 0.6469869 |
| 292 | Neu5Aca2-3Galb1-4GlcNAcb1-3Galb1-3GlcNAcb-Sp0                                                                            | 162  | 0 | 17 | 2 | 1 | 0.6424256 |
| 345 | Neu5Aca2-6Galb1-4GlcNAcb1-2Mana1-3Manb1-4GlcNAcb1-4GlcNAc-Sp12                                                           | 155  | 0 | 17 | 2 | 1 | 0.64269   |
| 49  | Mana1-3(Mana1-6)Manb1-4GlcNAcb1-4GlcNAcb-Sp12                                                                            | 88   | 0 | 18 | 2 | 1 | 0.6451799 |
| 482 | Gala1-3Galb1-3GlcNAcb1-6GalNAca-Sp14                                                                                     | 663  | 1 | 8  | 1 | 1 | 0.6236749 |
| 256 | Neu5Aca2-3Galb1-4GlcNAcb-Sp0                                                                                             | 55   | 0 | 18 | 2 | 1 | 0.6464226 |
| 289 | Galb1-4(Fuca1-3)GlcNAcb1-3Galb1-3(Fuca1-4)GlcNAcb-Sp0                                                                    | 74   | 0 | 18 | 2 | 1 | 0.6457073 |
| 225 | Neu5Aca2-8Neu5Aca2-3(GalNAcb1-4)Galb1-4Glc-Sp0                                                                           | 74   | 0 | 18 | 2 | 1 | 0.6457073 |
| 466 | Fuca1-2Galb1-3(Fuca1-4)GlcNAcb1-2Mana1-6(Fuca1-2Galb1-3(Fuca1-4)GlcNAcb1-2Mana1-3)Manb1-4GlcNAcb1-4(Fuca1-6)GlcNAcb-Sp19 | 227  | 0 | 15 | 2 | 1 | 0.6400426 |
| 97  | GalNAcb1-4GlcNAcb-Sp0                                                                                                    | 172  | 0 | 16 | 2 | 1 | 0.6420855 |
| 459 | Galb1-4GlcNAcb-(OCH2CH2)6NH2                                                                                             | 50   | 0 | 18 | 2 | 1 | 0.6466107 |
| 76  | Fuca1-2Galb1-4Glc-Sp0                                                                                                    | 143  | 0 | 16 | 2 | 1 | 0.643181  |
| 323 | Neu5Aca2-6Galb1-4GlcNAcb1-2Mana1-3(Neu5Aca2-3Galb1-4GlcNAcb1-2Mana1-6)Manb1-4GlcNAcb1-4GlcNAcb-Sp12                      | 7    | 0 | 19 | 2 | 1 | 0.6481897 |
| 354 | KDNa2-6Galb1-4GlcNAc-Sp0                                                                                                 | 52   | 0 | 18 | 2 | 1 | 0.6465354 |
| 42  | [6OSO3]Galb1-4Glc-Sp8                                                                                                    | 79   | 0 | 17 | 2 | 1 | 0.6455566 |

|     |                                                                                                                                    |     |   |    |   |   |           |
|-----|------------------------------------------------------------------------------------------------------------------------------------|-----|---|----|---|---|-----------|
| 347 | Galb1-4GlcNAcb1-2Mana1-6Manb1-4GlcNAcb1-4GlcNAc-Sp12                                                                               | 31  | 0 | 18 | 2 | 1 | 0.6473253 |
| 5   | GalNAca-Sp15                                                                                                                       | 356 | 1 | 12 | 1 | 1 | 0.6352603 |
| 414 | Gala1-3(Fuca1-2)Galb1-4(Fuca1-3)GlcNAcb1-3GalNAc-Sp14                                                                              | 217 | 0 | 14 | 2 | 1 | 0.6404591 |
| 299 | Galb1-4GlcNAcb1-3(Galb1-4GlcNAcb1-6)Galb1-4GlcNAc-Sp0                                                                              | 156 | 0 | 15 | 2 | 1 | 0.6427278 |
| 248 | Neu5Aca2-3Galb1-4[6OSO3]GlcNAcb-Sp8                                                                                                | 292 | 1 | 13 | 1 | 1 | 0.6376542 |
| 31  | [3OSO3]Galb1-4(Fuca1-3)GlcNAc-Sp0                                                                                                  | 64  | 0 | 17 | 2 | 1 | 0.6461215 |
| 485 | [3OSO3]Galb1-3(Fuca1-4)GlcNAca-Sp0                                                                                                 | 179 | 0 | 15 | 2 | 1 | 0.6418587 |
| 90  | GalNAca1-3GalNAcb-Sp8                                                                                                              | 130 | 0 | 15 | 2 | 1 | 0.6437094 |
| 346 | Galb1-4GlcNAcb1-2Mana1-3Manb1-4GlcNAcb1-4GlcNAc-Sp12                                                                               | 186 | 0 | 14 | 2 | 1 | 0.6416319 |
| 353 | KDNa2-3Galb1-4(Fuca1-3)GlcNAc-Sp0                                                                                                  | 296 | 1 | 12 | 1 | 1 | 0.6375403 |
| 127 | Galb1-3(Fuca1-4)GlcNAcb-Sp8                                                                                                        | 111 | 0 | 15 | 2 | 1 | 0.6444261 |
| 417 | Fuca1-2Galb1-4GlcNAcb1-2Mana1-3(Fuca1-2Galb1-4GlcNAcb1-2Mana1-6)Manb1-4GlcNAcb1-4(Fuca1-6)GlcNAcb-Sp22                             | 177 | 0 | 14 | 2 | 1 | 0.6419721 |
| 172 | GlcNAcb1-2Galb1-3GalNAca-Sp8                                                                                                       | 20  | 0 | 17 | 2 | 1 | 0.6477764 |
| 118 | Gala1-4Galb1-4GlcNAcb-Sp0                                                                                                          | 69  | 0 | 16 | 2 | 1 | 0.6459709 |
| 486 | Neu5Aca2-3Galb1-3(Neu5Aca2-6)GlcNAcb1-3(Fuca1-3(Galb1-4)GlcNAcb1-6)Galb1-4Glc-Sp21                                                 | 811 | 2 | 3  | 0 | 1 | 0.6181675 |
| 4   | GalNAca-Sp8                                                                                                                        | 126 | 0 | 15 | 2 | 1 | 0.6438603 |
| 472 | Neu5Aca2-3Galb1-4GlcNAcb1-6GalNAca-Sp14                                                                                            | 292 | 1 | 12 | 1 | 1 | 0.6376921 |
| 270 | Neu5Aca2-6Galb1-4Glc-Sp8                                                                                                           | 30  | 0 | 16 | 2 | 1 | 0.6474381 |
| 204 | Mana1-2Mana1-2Mana1-3Mana-Sp9                                                                                                      | 19  | 0 | 17 | 2 | 1 | 0.6478139 |
| 308 | GlcNAcb1-4GlcNAcb-Sp12                                                                                                             | 49  | 0 | 16 | 2 | 1 | 0.6467236 |
| 122 | Gala1-6Glc-Sp8                                                                                                                     | 55  | 0 | 16 | 2 | 1 | 0.6464978 |
| 69  | Fuca1-2Galb1-4(Fuca1-3)GlcNAcb1-3Galb1-4(Fuca1-3)GlcNAcb1-3Galb1-4(Fuca1-3)GlcNAcb-Sp0                                             | 108 | 0 | 15 | 2 | 1 | 0.6445392 |
| 350 | Galb1-4GlcNAcb1-2Mana1-3(Galb1-4GlcNAcb1-2Mana1-6)Manb1-4GlcNAcb1-4(Fuca1-6)GlcNAcb-Sp22                                           | 666 | 1 | 5  | 1 | 1 | 0.6236749 |
| 393 | Galb1-4GlcNAcb1-2Mana1-3(GlcNAcb1-2Mana1-6)Manb1-4GlcNAcb1-4GlcNAc-Sp12                                                            | 67  | 0 | 15 | 2 | 1 | 0.6460838 |
| 495 | Neu5Aca2-6GalNAcb1-4[6OSO3]GlcNAcb-Sp8                                                                                             | 21  | 0 | 16 | 2 | 1 | 0.6477764 |
| 96  | GalNAcb1-4(Fuca1-3)GlcNAcb-Sp0                                                                                                     | 152 | 0 | 14 | 2 | 1 | 0.6429167 |
| 21  | [3OSO3][6OSO3]Galb1-4[6OSO3]GlcNAcb-Sp0                                                                                            | 41  | 0 | 16 | 2 | 1 | 0.6470245 |
| 34  | [3OSO3]Galb1-4[6OSO3]GlcNAcb-Sp8                                                                                                   | 237 | 0 | 12 | 1 | 1 | 0.6397775 |
| 14  | Manb-Sp8                                                                                                                           | 54  | 0 | 15 | 2 | 1 | 0.6465731 |
| 302 | Galb1-4GlcNAcb1-6Galb1-4GlcNAcb-Sp0                                                                                                | 77  | 0 | 15 | 2 | 1 | 0.6457073 |
| 215 | Neu5Aca2-3Galb1-4GlcNAcb1-3Galb1-4(Fuca1-3)GlcNAc-Sp0                                                                              | 603 | 1 | 6  | 1 | 1 | 0.626055  |
| 146 | Galb1-3GlcNAcb-Sp0                                                                                                                 | 84  | 0 | 14 | 2 | 1 | 0.6454813 |
| 276 | Neu5Acb2-6Galb1-4GlcNAcb-Sp8                                                                                                       | 73  | 0 | 14 | 2 | 1 | 0.6458956 |
| 40  | 6-H2PO3Mana-Sp8                                                                                                                    | 87  | 0 | 14 | 2 | 1 | 0.6453683 |
| 324 | Fuca1-3(Galb1-4)GlcNAcb1-2Mana1-3(Fuca1-3(Galb1-4)GlcNAcb1-2Mana1-6)Manb1-4GlcNAcb1-4GlcNAcb-Sp20                                  | 173 | 0 | 13 | 1 | 1 | 0.6421611 |
| 435 | Galb1-4GlcNAcb1-4(Galb1-4GlcNAcb1-2)Mana1-3(GlcNAcb1-4)(Galb1-4GlcNAcb1-6)(Galb1-4-GlcNAcb1-2)Mana1-6)Manb1-4GlcNAcb1-4GlcNAc-Sp21 | 135 | 0 | 13 | 2 | 1 | 0.6435962 |
| 320 | Neu5Gcb2-6Galb1-4GlcNAc-Sp8                                                                                                        | 105 | 0 | 14 | 2 | 1 | 0.64469   |
| 271 | Neu5Aca2-6Galb-Sp8                                                                                                                 | 5   | 0 | 15 | 2 | 1 | 0.648415  |
| 157 | Galb1-4GlcNAcb1-3GalNAca-Sp14                                                                                                      | 51  | 0 | 15 | 2 | 1 | 0.6466859 |
| 112 | Gala1-3Galb1-4(Fuca1-3)GlcNAcb-Sp8                                                                                                 | 118 | 0 | 13 | 2 | 1 | 0.6442375 |
| 75  | Fuca1-2Galb1-4GlcNAcb-Sp8                                                                                                          | 818 | 2 | 1  | 0 | 1 | 0.6179745 |
| 87  | GlcNAcb1-3Galb1-3GalNAca-Sp8                                                                                                       | 120 | 0 | 13 | 2 | 1 | 0.6441621 |
| 181 | GlcNAcb1-3Galb1-4Glc-Sp0                                                                                                           | 226 | 0 | 11 | 1 | 1 | 0.6402319 |
| 416 | Galb1-4(Fuca1-3)GlcNAcb1-2Mana1-3(Galb1-4(Fuca1-3)GlcNAcb1-2Mana1-6)Manb1-4GlcNAcb1-4(Fuca1-6)GlcNAcb-Sp22                         | 200 | 0 | 12 | 1 | 1 | 0.6411781 |
| 337 | GlcNAca1-4Galb1-3GlcNAcb-Sp0                                                                                                       | 115 | 0 | 13 | 1 | 1 | 0.6443507 |
| 205 | Mana1-2Mana1-3(Mana1-2Mana1-6)Mana-Sp9                                                                                             | 59  | 0 | 14 | 2 | 1 | 0.6464226 |
| 36  | [3OSO3]Galb1-4GlcNAcb-Sp8                                                                                                          | 53  | 0 | 14 | 2 | 1 | 0.6466483 |
| 193 | Gica1-4Gica-Sp8                                                                                                                    | 39  | 0 | 14 | 2 | 1 | 0.6471749 |
| 409 | Neu5Aca2-3Galb1-3GalNAcb1-4(Neu5Aca2-8Neu5Aca2-3)Galb1-4Glc-Sp0                                                                    | 71  | 0 | 13 | 2 | 1 | 0.6460085 |

|     |                                                                                                     |     |   |    |   |   |           |
|-----|-----------------------------------------------------------------------------------------------------|-----|---|----|---|---|-----------|
| 1   | Gala-Sp8                                                                                            | 106 | 0 | 13 | 1 | 1 | 0.64469   |
| 15  | GalNAcb-Sp8                                                                                         | 103 | 0 | 13 | 1 | 1 | 0.6448031 |
| 245 | Fuca1-2[6OSO3]Galb1-4Glc-Sp0                                                                        | 17  | 0 | 14 | 2 | 1 | 0.6480018 |
| 511 | [6PO3]Galb1-4GlcNAcb-Sp0                                                                            | 56  | 0 | 14 | 2 | 1 | 0.6465354 |
| 203 | KDNa2-3Galb1-4GlcNAcb-Sp0                                                                           | 141 | 0 | 12 | 1 | 1 | 0.6434075 |
| 217 | Fuca1-2[6OSO3]Galb1-4GlcNAc-Sp0                                                                     | 175 | 0 | 11 | 1 | 1 | 0.6421611 |
| 228 | Neu5Aca2-3(GalNAcb1-4)Galb1-4GlcNAcb-Sp0                                                            | 185 | 0 | 11 | 1 | 1 | 0.6417831 |
| 13  | Glc-Sp8                                                                                             | 43  | 0 | 13 | 2 | 1 | 0.6470621 |
| 135 | Galb1-3(Neu5Aca2-6)GlcNAcb1-4Galb1-4Glc-Sp10                                                        | 82  | 0 | 13 | 1 | 1 | 0.6455943 |
| 130 | Galb1-3(GlcNAcb1-6)GalNAca-Sp8                                                                      | 50  | 0 | 13 | 2 | 1 | 0.6467988 |
| 442 | [6OSO3]Galb1-3[6OSO3]GlcNAc-Sp0                                                                     | 105 | 0 | 12 | 1 | 1 | 0.6447654 |
| 394 | GlcNAcb1-2Mana1-3(Galb1-4GlcNAcb1-2Mana1-6)Manb1-4GlcNAcb1-4GlcNAc-Sp12                             | 129 | 0 | 12 | 1 | 1 | 0.6438603 |
| 221 | Neu5Aca2-3Galb1-3GalNAca-Sp14                                                                       | 260 | 1 | 9  | 1 | 1 | 0.6390197 |
| 9   | Neu5Aca-Sp8                                                                                         | 38  | 0 | 13 | 1 | 1 | 0.6472501 |
| 403 | Galb1-3GlcNAca1-6Galb1-4GlcNAcb-Sp0                                                                 | 103 | 0 | 12 | 1 | 1 | 0.6448408 |
| 62  | Fuca1-2Galb1-3GalNAcb1-4(Neu5Aca2-3)Galb1-4Glc-Sp0                                                  | 55  | 0 | 13 | 1 | 1 | 0.6466107 |
| 93  | GalNAcb1-3GalNAca-Sp8                                                                               | 202 | 0 | 10 | 1 | 1 | 0.6411781 |
| 190 | GlcNAcb1-6GalNAca-Sp14                                                                              | 22  | 0 | 13 | 1 | 1 | 0.6478515 |
| 150 | Galb1-4(Fuca1-3)GlcNAcb1-4Galb1-4(Fuca1-3)GlcNAcb-Sp0                                               | 43  | 0 | 13 | 1 | 1 | 0.6470621 |
| 50  | Mana1-3(Mana1-6)Manb1-4GlcNAcb1-4GlcNAcb-Sp13                                                       | 67  | 0 | 12 | 1 | 1 | 0.6461967 |
| 405 | GlcNAcb1-6(GlcNAcb1-3)GalNAca-Sp14                                                                  | 19  | 0 | 13 | 1 | 1 | 0.6479643 |
| 322 | Neu5Aca2-3Galb1-4GlcNAcb1-2Mana1-3(Neu5Aca2-3Galb1-4GlcNAcb1-2Mana1-6)Manb1-4GlcNAcb1-4GlcNAcb-Sp12 | 168 | 0 | 10 | 1 | 1 | 0.6424634 |
| 487 | Fuca1-2Galb1-4GlcNAcb1-6GalNAca-Sp14                                                                | 233 | 0 | 9  | 1 | 1 | 0.6400426 |
| 106 | Gala1-3(Fuca1-2)Galb-Sp8                                                                            | 22  | 0 | 13 | 1 | 1 | 0.6478515 |
| 155 | Galb1-4GalNAcb1-3(Fuca1-2)Galb1-4GlcNAcb-Sp8                                                        | 256 | 1 | 9  | 1 | 1 | 0.6391713 |
| 462 | Glc1-6Glc1-6Glc1-6Glc-Sp10                                                                          | 102 | 0 | 11 | 1 | 1 | 0.6449161 |
| 251 | Neu5Aca2-3Galb1-4(Fuca1-3)GlcNAcb-Sp0                                                               | 110 | 0 | 11 | 1 | 1 | 0.6446146 |
| 124 | Galb1-3(Fuca1-4)GlcNAcb1-3Galb1-4(Fuca1-3)GlcNAcb-Sp0                                               | 44  | 0 | 12 | 1 | 1 | 0.6470621 |
| 505 | [6OSO3]GalNAcb1-4GlcNAc-Sp8                                                                         | 138 | 0 | 10 | 1 | 1 | 0.6435962 |
| 132 | Galb1-3(Neu5Aca2-6)GalNAca-Sp8                                                                      | 30  | 0 | 12 | 1 | 1 | 0.6475885 |
| 139 | Galb1-3GalNAcb-Sp8                                                                                  | 146 | 0 | 10 | 1 | 1 | 0.6432942 |
| 151 | Galb1-4(Fuca1-3)GlcNAcb1-4Galb1-4(Fuca1-3)GlcNAcb1-4Galb1-4(Fuca1-3)GlcNAcb-Sp0                     | 234 | 0 | 9  | 1 | 1 | 0.6400047 |
| 489 | Galb1-4(Fuca1-3)GlcNAcb1-2Mana-Sp0                                                                  | 26  | 0 | 12 | 1 | 1 | 0.6477388 |
| 70  | Fuca1-2Galb1-4(Fuca1-3)GlcNAcb-Sp0                                                                  | 97  | 0 | 11 | 1 | 1 | 0.6451046 |
| 229 | Neu5Aca2-3(GalNAcb1-4)Galb1-4GlcNAcb-Sp8                                                            | 172 | 0 | 10 | 1 | 1 | 0.6423123 |
| 166 | Galb1-4GlcNAcb-Sp0                                                                                  | 35  | 0 | 12 | 1 | 1 | 0.6474005 |
| 83  | [3OSO3]Galb1-4(Fuca1-3)Glc-Sp0                                                                      | 57  | 0 | 12 | 1 | 1 | 0.6465731 |
| 164 | Galb1-3(Galb1-4GlcNAcb1-6)GalNAca-Sp8                                                               | 155 | 0 | 10 | 1 | 1 | 0.6429544 |
| 497 | [3OSO3]GalNAcb1-4(Fuca1-3)GlcNAcb-Sp8                                                               | 64  | 0 | 11 | 1 | 1 | 0.6463473 |
| 315 | Neu5Aca2-3Galb1-4GlcNAcb1-2Mana1-3(Neu5Aca2-6Galb1-4GlcNAcb1-2Mana1-6)Manb1-4GlcNAcb1-4GlcNAcb-Sp12 | 5   | 0 | 12 | 1 | 1 | 0.6485277 |
| 167 | Galb1-4GlcNAcb-Sp8                                                                                  | 207 | 0 | 9  | 1 | 1 | 0.6410267 |
| 342 | Mana1-3(Neu5Aca2-6Galb1-4GlcNAcb1-2Mana1-6)Manb1-4GlcNAcb1-4GlcNAc-Sp12                             | 53  | 0 | 12 | 1 | 1 | 0.6467236 |
| 230 | Neu5Aca2-3(GalNAcb1-4)Galb1-4Glc-Sp0                                                                | 40  | 0 | 12 | 1 | 1 | 0.6472125 |
| 12  | Galb-Sp8                                                                                            | 49  | 0 | 12 | 1 | 1 | 0.646874  |
| 441 | [6OSO3]Galb1-3GlcNAcb-Sp0                                                                           | 42  | 0 | 12 | 1 | 1 | 0.6471373 |
| 48  | [9NAc]Neu5Aca2-6Galb1-4GlcNAcb-Sp8                                                                  | 15  | 0 | 12 | 1 | 1 | 0.6481521 |
| 311 | Mana1-6(Mana1-3)Mana1-6(Mana1-3)Manb-Sp10                                                           | 30  | 0 | 12 | 1 | 1 | 0.6475885 |
| 317 | Neu5Aca2-6Galb1-4GlcNAcb1-2Mana1-3(GlcNAcb1-2Mana1-6)Manb1-4GlcNAcb1-4GlcNAcb-Sp12                  | 22  | 0 | 12 | 1 | 1 | 0.6478891 |
| 274 | Galb1-3(Fuca1-4)GlcNAcb1-3Galb1-3(Fuca1-4)GlcNAcb-Sp0                                               | 182 | 0 | 9  | 1 | 1 | 0.6419721 |

|     |                                                                                                                                             |     |   |    |   |   |           |
|-----|---------------------------------------------------------------------------------------------------------------------------------------------|-----|---|----|---|---|-----------|
| 77  | Fuca1-2Galb-Sp8                                                                                                                             | 22  | 0 | 12 | 1 | 1 | 0.6478891 |
| 445 | Galb1-4GlcNAcb1-3(Galb1-4GlcNAcb1-6)GalNAc-Sp14                                                                                             | 235 | 0 | 8  | 1 | 1 | 0.6400047 |
| 473 | Neu5Aca2-6Galb1-4GlcNAcb1-6GalNAca-Sp14                                                                                                     | 150 | 0 | 9  | 1 | 1 | 0.643181  |
| 284 | Neu5Gca-Sp8                                                                                                                                 | 84  | 0 | 10 | 1 | 1 | 0.645632  |
| 183 | GlcNAcb1-4(GlcNAcb1-6)GalNAca-Sp8                                                                                                           | 113 | 0 | 10 | 1 | 1 | 0.6445392 |
| 303 | GalNAcb1-3Galb-Sp8                                                                                                                          | 353 | 1 | 6  | 1 | 1 | 0.6356026 |
| 423 | Fuca1-2Galb1-3GlcNAcb1-2Mana1-3(Fuca1-2Galb1-3GlcNAcb1-2Mana1-6)Manb1-4GlcNAcb1-4(Fuca1-6)GlcNAcb-Sp22                                      | 308 | 1 | 6  | 1 | 1 | 0.6373125 |
| 2   | Gica-Sp8                                                                                                                                    | 61  | 0 | 11 | 1 | 1 | 0.6464602 |
| 480 | Neu5Aca2-6Galb1-4GlcNAcb1-6(Fuca1-2Galb1-4(Fuca1-3)GlcNAcb1-3)Galb1-4Glc-Sp21                                                               | 180 | 0 | 9  | 1 | 1 | 0.6420477 |
| 501 | Galb1-4GlcNAcb1-2(Gal b1-4GlcNAcb1-4)Mana1-3(GlcNAcb1-4)(Galb1-4GlcNAcb1-2)(Galb1-4GlcNAcb1-6)Mana1-6]Manb1-4GlcNAcb1-4(Fuca1-6)GlcNAc-Sp21 | 321 | 1 | 6  | 1 | 1 | 0.6368188 |
| 477 | Mana1-6(Mana1-3)Manb1-4GlcNAcb1-4(Fuca1-6)GlcNAcb-Sp19                                                                                      | 145 | 0 | 9  | 1 | 1 | 0.6433697 |
| 506 | [3OSO3]GalNAcb1-4[3OSO3]GlcNAc-Sp8                                                                                                          | 20  | 0 | 11 | 1 | 1 | 0.6480018 |
| 111 | Gala1-3GalNAcb-Sp8                                                                                                                          | 55  | 0 | 11 | 1 | 1 | 0.6466859 |
| 71  | Fuca1-2Galb1-4(Fuca1-3)GlcNAcb-Sp8                                                                                                          | 76  | 0 | 10 | 1 | 1 | 0.6459332 |
| 192 | Gica1-4Glc-Sp8                                                                                                                              | 176 | 0 | 8  | 1 | 1 | 0.6422367 |
| 219 | Fuca1-2[6OSO3]Galb1-4[6OSO3]Glc-Sp0                                                                                                         | 156 | 0 | 9  | 1 | 1 | 0.6429544 |
| 56  | Neu5Aca2-6Galb1-4GlcNAcb1-2Mana1-3(Neu5Aca2-6Galb1-4GlcNAcb1-2Mana1-6)Manb1-4GlcNAcb1-4GlcNAcb-Sp13                                         | 27  | 0 | 11 | 1 | 1 | 0.6477388 |
| 138 | Galb1-3GalNAca-Sp16                                                                                                                         | 72  | 0 | 10 | 1 | 1 | 0.6460838 |
| 381 | Fuca1-2Galb1-3(Fuca1-4)GlcNAcb1-3(Galb1-4GlcNAcb1-6)Galb1-4Glc-Sp21                                                                         | 70  | 0 | 10 | 1 | 1 | 0.6461591 |
| 267 | Neu5Aca2-6Galb1-4GlcNAcb1-3Galb1-4(Fuca1-3)GlcNAcb1-3Galb1-4(Fuca1-3)GlcNAcb-Sp0                                                            | 118 | 0 | 9  | 1 | 1 | 0.6443884 |
| 194 | Gica1-6Gica1-6Glc-Sp8                                                                                                                       | 27  | 0 | 11 | 1 | 1 | 0.6477388 |
| 44  | [6OSO3]Galb1-4[6OSO3]Glc-Sp8                                                                                                                | 64  | 0 | 10 | 1 | 1 | 0.6463849 |
| 169 | Galb1-4Glc-Sp8                                                                                                                              | 39  | 0 | 10 | 1 | 1 | 0.6473253 |
| 458 | Galb1-4GlcNAcb1-6(Galb1-4GlcNAcb1-2)Mana1-6(Galb1-4GlcNAcb1-2Mana1-3)Manb1-4GlcNAcb1-4GlcNAcb-Sp19                                          | 360 | 1 | 5  | 1 | 1 | 0.6353744 |
| 307 | GlcNAcb1-4GlcNAcb-Sp10                                                                                                                      | 12  | 0 | 11 | 1 | 1 | 0.6483023 |
| 242 | Neu5Aca2-3Galb-Sp8                                                                                                                          | 24  | 0 | 11 | 1 | 1 | 0.6478515 |
| 195 | Glc1-4Glc-Sp8                                                                                                                               | 56  | 0 | 10 | 1 | 1 | 0.6466859 |
| 88  | GalNAca1-3(Fuca1-2)Galb-Sp8                                                                                                                 | 111 | 0 | 9  | 1 | 1 | 0.6446523 |
| 404 | GalNAcb1-3Gala1-6Galb1-4Glc-Sp8                                                                                                             | 112 | 0 | 9  | 1 | 1 | 0.6446146 |
| 508 | [3OSO3]GalNAcb1-4GlcNAc-Sp8                                                                                                                 | 33  | 0 | 10 | 1 | 1 | 0.6475509 |
| 3   | Mana-Sp8                                                                                                                                    | 21  | 0 | 10 | 1 | 1 | 0.6480018 |
| 341 | GlcNAca1-4Galb1-3GalNAc-Sp14                                                                                                                | 160 | 0 | 8  | 1 | 1 | 0.6428411 |
| 474 | Neu5Aca2-6Galb1-4 GlcNAcb1-6(Neu5Aca2-6Galb1-4GlcNAcb1-3)GalNAca-Sp14                                                                       | 134 | 0 | 8  | 1 | 1 | 0.6438226 |
| 78  | Fuca1-3GlcNAcb-Sp8                                                                                                                          | 40  | 0 | 10 | 1 | 1 | 0.6472877 |
| 470 | Neu5Aca2-6Galb1-4GlcNAcb1-6(Galb1-3GlcNAcb1-3)Galb1-4Glc-Sp21                                                                               | 199 | 0 | 7  | 1 | 1 | 0.641405  |
| 27  | [3OSO3]Galb1-3(Fuca1-4)GlcNAcb-Sp8                                                                                                          | 39  | 0 | 10 | 1 | 1 | 0.6473253 |
| 7   | Fuca-Sp9                                                                                                                                    | 74  | 0 | 9  | 1 | 1 | 0.6460462 |
| 152 | Galb1-4[6OSO3]Glc-Sp0                                                                                                                       | 345 | 1 | 5  | 1 | 1 | 0.6359448 |
| 197 | G-ol-Sp8                                                                                                                                    | 72  | 0 | 9  | 1 | 1 | 0.6461215 |
| 99  | Gala1-2Galb-Sp8                                                                                                                             | 95  | 0 | 9  | 1 | 1 | 0.6452553 |
| 92  | GalNAca1-4(Fuca1-2)Galb1-4GlcNAcb-Sp8                                                                                                       | 79  | 0 | 9  | 1 | 1 | 0.6458579 |
| 492 | Fuca1-2Galb1-4GlcNAcb1-2Mana-Sp0                                                                                                            | 24  | 0 | 10 | 1 | 1 | 0.6478891 |
| 140 | Galb1-3GalNAcb1-3Gala1-4Galb1-4Glc-Sp0                                                                                                      | 158 | 0 | 8  | 1 | 1 | 0.6429167 |
| 293 | [3OSO3][4OSO3]Galb1-4GlcNAcb-Sp0                                                                                                            | 112 | 0 | 8  | 1 | 1 | 0.6446523 |
| 178 | GlcNAcb1-3Galb1-4GlcNAcb-Sp0                                                                                                                | 210 | 0 | 7  | 1 | 1 | 0.6409889 |
| 8   | Rhaa-Sp8                                                                                                                                    | 66  | 0 | 9  | 1 | 1 | 0.6463473 |
| 174 | GlcNAcb1-3(GlcNAcb1-6)Galb1-4GlcNAcb-Sp8                                                                                                    | 42  | 0 | 10 | 1 | 1 | 0.6472125 |
| 123 | Galb1-2Galb-Sp8                                                                                                                             | 27  | 0 | 10 | 1 | 1 | 0.6477764 |
| 107 | Gala1-3(Fuca1-2)Galb-Sp18                                                                                                                   | 66  | 0 | 9  | 1 | 1 | 0.6463473 |

|     |                                                                                                     |     |   |   |   |   |           |
|-----|-----------------------------------------------------------------------------------------------------|-----|---|---|---|---|-----------|
| 41  | [6OSO3]Galb1-4Glc-Sp0                                                                               | 88  | 0 | 9 | 1 | 1 | 0.645519  |
| 380 | Galb1-3GlcNAcb1-3(Galb1-4(Fuca1-3)GlcNAcb1-6)Galb1-4Glc-Sp21                                        | 93  | 0 | 9 | 1 | 1 | 0.6453306 |
| 38  | [4OSO3][6OSO3]Galb1-4GlcNAcb-Sp0                                                                    | 105 | 0 | 8 | 1 | 1 | 0.6449161 |
| 373 | Neu5Aca2-3Galb1-4GlcNAcb1-3GalNAc-Sp14                                                              | 52  | 0 | 9 | 1 | 1 | 0.646874  |
| 95  | GalNAcb1-3Gala1-4Galb1-4GlcNAcb-Sp0                                                                 | 209 | 0 | 6 | 1 | 1 | 0.6410646 |
| 463 | GlcA1-4GlcA1-4GlcA1-4Glc-Sp10                                                                       | 57  | 0 | 9 | 1 | 1 | 0.6466859 |
| 496 | GalNAcb1-4[6OSO3](Fuca1-3)GlcNAcb-Sp8                                                               | 105 | 0 | 8 | 1 | 1 | 0.6449161 |
| 20  | GlcNAcb1-3(GlcNAcb1-4)(GlcNAcb1-6)GlcNAc-Sp8                                                        | 93  | 0 | 8 | 1 | 1 | 0.6453683 |
| 439 | Neu5Aca2-3Galb1-4GlcNAcb1-3Galb-Sp8                                                                 | 71  | 0 | 8 | 1 | 1 | 0.6461967 |
| 35  | [3OSO3]Galb1-4GlcNAcb-Sp0                                                                           | 72  | 0 | 8 | 1 | 1 | 0.6461591 |
| 218 | Fuca1-2Galb1-4[6OSO3]GlcNAc-Sp8                                                                     | 373 | 1 | 3 | 0 | 1 | 0.634956  |
| 464 | Neu5Aca2-3Galb1-4GlcNAcb1-6(Neu5Aca2-3Galb1-4GlcNAcb1-3)GalNAc-Sp14                                 | 67  | 0 | 8 | 1 | 1 | 0.6463473 |
| 224 | Neu5Aca2-8Neu5Aca2-8Neu5Aca2-3Galb1-4Glc-Sp0                                                        | 81  | 0 | 8 | 1 | 1 | 0.6458203 |
| 89  | GalNAca1-3(Fuca1-2)Galb-Sp18                                                                        | 90  | 0 | 8 | 1 | 1 | 0.6454813 |
| 238 | Neu5Aca2-3Galb1-3(Neu5Aca2-3Galb1-4)GlcNAcb-Sp8                                                     | 68  | 0 | 8 | 1 | 1 | 0.6463097 |
| 388 | Galb1-3GlcNAcb1-3GalNAc-Sp14                                                                        | 104 | 0 | 8 | 1 | 1 | 0.6449538 |
| 55  | Neu5Aca2-6Galb1-4GlcNAcb1-2Mana1-3(Neu5Aca2-6Galb1-4GlcNAcb1-2Mana1-6)Manb1-4GlcNAcb1-4GlcNAcb-Sp12 | 113 | 0 | 7 | 1 | 1 | 0.6446523 |
| 510 | Galb1-4[6PO3]GlcNAcb-Sp0                                                                            | 82  | 0 | 8 | 1 | 1 | 0.6457826 |
| 481 | Galb1-3GlcNAcb1-6GalNAc-Sp14                                                                        | 147 | 0 | 7 | 1 | 1 | 0.6433697 |
| 158 | Galb1-4GlcNAcb1-3Galb1-4(Fuca1-3)GlcNAcb1-3Galb1-4(Fuca1-3)GlcNAcb-Sp0                              | 197 | 0 | 6 | 1 | 1 | 0.6415184 |
| 282 | Neu5Gca2-6GalNAc-Sp0                                                                                | 29  | 0 | 9 | 1 | 1 | 0.6477388 |
| 121 | Gala1-4GlcNAcb-Sp8                                                                                  | 54  | 0 | 8 | 1 | 1 | 0.6468364 |
| 283 | Neu5Gca2-6Galb1-4GlcNAcb-Sp0                                                                        | 83  | 0 | 8 | 1 | 1 | 0.645745  |
| 171 | GlcNAca1-6Galb1-4GlcNAcb-Sp8                                                                        | 9   | 0 | 9 | 1 | 1 | 0.6484901 |
| 51  | GlcNAcb1-2Mana1-3(GlcNAcb1-2Mana1-6)Manb1-4GlcNAcb1-4GlcNAcb-Sp12                                   | 15  | 0 | 9 | 1 | 1 | 0.6482648 |
| 272 | Neu5Aca2-8Neu5Aca-Sp8                                                                               | 7   | 0 | 9 | 1 | 1 | 0.6485652 |
| 207 | Mana1-6(Mana1-2Mana1-3)Mana1-6(Mana1-2Mana1-3)Manb1-4GlcNAcb1-4GlcNAcb-Sp12                         | 18  | 0 | 9 | 1 | 1 | 0.6481521 |
| 68  | Fuca1-2Galb1-4(Fuca1-3)GlcNAcb1-3Galb1-4(Fuca1-3)GlcNAcb-Sp0                                        | 49  | 0 | 8 | 1 | 0 | 0.6470245 |
| 18  | GlcN(Gc)b-Sp8                                                                                       | 18  | 0 | 8 | 1 | 0 | 0.6481897 |
| 361 | Mana1-3(Galb1-4GlcNAcb1-2Mana1-6)Manb1-4GlcNAcb1-4GlcNAcb-Sp12                                      | 77  | 0 | 7 | 1 | 0 | 0.6460085 |
| 19  | Galb1-4GlcNAcb1-3(Galb1-4GlcNAcb1-6)GalNAc-Sp8                                                      | 56  | 0 | 8 | 1 | 0 | 0.6467612 |
| 47  | [9NAc]Neu5Aca-Sp8                                                                                   | 187 | 0 | 6 | 1 | 0 | 0.6418965 |
| 17  | GlcNAcb-Sp8                                                                                         | 140 | 0 | 6 | 1 | 0 | 0.6436716 |
| 116 | Gala1-3Galb-Sp8                                                                                     | 110 | 0 | 7 | 1 | 0 | 0.6447654 |
| 200 | GlcAb1-3Galb-Sp8                                                                                    | 14  | 0 | 8 | 1 | 0 | 0.6483399 |
| 211 | Mana1-3(Mana1-2Mana1-2Mana1-6)Mana-Sp9                                                              | 33  | 0 | 8 | 1 | 0 | 0.647626  |
| 58  | Fuca1-2Galb1-3GalNAcb1-3Gala1-4Galb1-4Glc-Sp9                                                       | 12  | 0 | 8 | 1 | 0 | 0.648415  |
| 80  | Fucb1-3GlcNAcb-Sp8                                                                                  | 30  | 0 | 8 | 1 | 0 | 0.6477388 |
| 189 | GlcNAcb1-6GalNAc-Sp8                                                                                | 242 | 0 | 4 | 0 | 0 | 0.6398911 |
| 131 | Galb1-3(GlcNAcb1-6)GalNAc-Sp14                                                                      | 66  | 0 | 7 | 1 | 0 | 0.6464226 |
| 182 | GlcNAcb1-4-MDPLys                                                                                   | 30  | 0 | 8 | 1 | 0 | 0.6477388 |
| 336 | GlcNAca1-4Galb1-4GlcNAcb-Sp0                                                                        | 99  | 0 | 7 | 1 | 0 | 0.6451799 |
| 175 | GlcNAcb1-3GalNAc-Sp8                                                                                | 136 | 0 | 6 | 1 | 0 | 0.6438226 |
| 79  | Fuca1-4GlcNAcb-Sp8                                                                                  | 55  | 0 | 7 | 1 | 0 | 0.6468364 |
| 509 | [4OSO3]GalNAcb-Sp10                                                                                 | 36  | 0 | 8 | 1 | 0 | 0.6475133 |
| 300 | Galb1-4GlcNAcb1-3(GlcNAcb1-6)Galb1-4GlcNAc-Sp0                                                      | 14  | 0 | 8 | 1 | 0 | 0.6483399 |
| 449 | Fuca1-2Galb1-4GlcNAcb1-3(Fuca1-2Galb1-4GlcNAcb1-6)GalNAc-Sp14                                       | 204 | 0 | 5 | 1 | 0 | 0.6412915 |
| 257 | Neu5Aca2-3Galb1-4GlcNAcb-Sp8                                                                        | 65  | 0 | 7 | 1 | 0 | 0.6464602 |
| 136 | Galb1-3GalNAc-Sp8                                                                                   | 267 | 1 | 3 | 0 | 0 | 0.6389817 |



|     |                                                                                                   |     |   |   |   |   |           |
|-----|---------------------------------------------------------------------------------------------------|-----|---|---|---|---|-----------|
| 298 | Galb1-4GlcNAcb1-2Mana1-3(Neu5Aca2-6Galb1-4GlcNAcb1-2Mana1-6)Manb1-4GlcNAcb1-4GlcNAcb-Sp12         | 57  | 0 | 7 | 1 | 0 | 0.6467612 |
| 402 | Galb1-3GlcNAcb1-6Galb1-4GlcNAcb-Sp0                                                               | 83  | 0 | 6 | 1 | 0 | 0.6458203 |
| 186 | GlcNAcb1-4GlcNAcb1-4GlcNAcb1-4GlcNAcb1-4GlcNAcb-Sp8                                               | 26  | 0 | 7 | 1 | 0 | 0.6479267 |
| 233 | Neu5Aca2-3GalNAca-Sp8                                                                             | 8   | 0 | 8 | 1 | 0 | 0.6485652 |
| 312 | Mana1-2Mana1-2Mana1-3(Mana1-2Mana1-6(Mana1-3)Mana1-6)Mana-Sp9                                     | 78  | 0 | 6 | 1 | 0 | 0.6460085 |
| 262 | Neu5Aca2-6GalNAca-Sp8                                                                             | 75  | 0 | 6 | 1 | 0 | 0.6461215 |
| 153 | Galb1-4[6OSO3]Glc-Sp8                                                                             | 106 | 0 | 6 | 1 | 0 | 0.6449538 |
| 176 | GlcNAcb1-3GalNAca-Sp14                                                                            | 51  | 0 | 7 | 1 | 0 | 0.6469869 |
| 507 | GalNAcb1-4[6OSO3]GlcNAc-Sp8                                                                       | 44  | 0 | 7 | 1 | 0 | 0.6472501 |
| 11  | Neu5Acb-Sp8                                                                                       | 35  | 0 | 7 | 1 | 0 | 0.6475885 |
| 240 | Neu5Aca2-3Galb1-3(Neu5Aca2-6)GalNAca-Sp8                                                          | 7   | 0 | 7 | 1 | 0 | 0.6486403 |
| 294 | [6OSO3]Galb1-4[6OSO3]GlcNAcb-Sp0                                                                  | 65  | 0 | 6 | 1 | 0 | 0.6464978 |
| 60  | Fuca1-2Galb1-3GalNAca-Sp8                                                                         | 147 | 0 | 5 | 1 | 0 | 0.6434452 |
| 141 | Galb1-3GalNAcb1-4(Neu5Aca2-3)Galb1-4Glc-Sp0                                                       | 193 | 0 | 4 | 0 | 0 | 0.6417453 |
| 129 | Galb1-4GlcNAcb1-6GalNAca-Sp8                                                                      | 37  | 0 | 7 | 1 | 0 | 0.6475133 |
| 258 | Neu5Aca2-3Galb1-4GlcNAcb1-3Galb1-4GlcNAcb-Sp0                                                     | 69  | 0 | 6 | 1 | 0 | 0.6463473 |
| 366 | Galb1-4GlcNAcb1-2(Galb1-4GlcNAcb1-4)Mana1-3(Galb1-4GlcNAcb1-2Mana1-6)Manb1-4GlcNAcb1-4GlcNAc-Sp21 | 139 | 0 | 5 | 1 | 0 | 0.6437471 |
| 305 | GlcNAcb1-2Mana1-3(Neu5Aca2-6Galb1-4GlcNAcb1-2Mana1-6)Manb1-4GlcNAcb1-4GlcNAcb-Sp12                | 21  | 0 | 7 | 1 | 0 | 0.6481145 |
| 143 | Galb1-3Galb-Sp8                                                                                   | 139 | 0 | 5 | 1 | 0 | 0.6437471 |
| 432 | Galb1-4GlcNAcb1-2Mana1-3(GlcNAcb1-4)(Galb1-4GlcNAcb1-2)Manb1-4GlcNAcb1-4GlcNAc-Sp21               | 197 | 0 | 4 | 0 | 0 | 0.6415941 |
| 185 | GlcNAcb1-4GlcNAcb1-4GlcNAcb1-4GlcNAcb1-4GlcNAcb1-4GlcNAcb1-4b-Sp8                                 | 36  | 0 | 6 | 1 | 0 | 0.6475885 |
| 37  | [3OSO3]Galb-Sp8                                                                                   | 56  | 0 | 6 | 1 | 0 | 0.6468364 |
| 214 | Manb1-4GlcNAcb-Sp0                                                                                | 8   | 0 | 7 | 1 | 0 | 0.6486028 |
| 285 | Galb1-3(Neu5Aca2-3Galb1-4GlcNAcb1-6)GalNAca-Sp14                                                  | 77  | 0 | 6 | 1 | 0 | 0.6460462 |
| 277 | Neu5Gca2-3Galb1-3(Fuca1-4)GlcNAcb-Sp0                                                             | 31  | 0 | 6 | 1 | 0 | 0.6477764 |
| 310 | Mana1-6Manb-Sp10                                                                                  | 16  | 0 | 6 | 1 | 0 | 0.6483399 |
| 117 | Gala1-4(Fuca1-2)Galb1-4GlcNAcb-Sp8                                                                | 55  | 0 | 5 | 1 | 0 | 0.6469116 |
| 120 | Gala1-4Galb1-4Glc-Sp0                                                                             | 35  | 0 | 6 | 1 | 0 | 0.647626  |
| 363 | Neu5Aca2-6GlcNAcb1-4GlcNAc-Sp21                                                                   | 122 | 0 | 4 | 0 | 0 | 0.6444261 |
| 396 | Fuca1-2Galb1-4GlcNAcb1-3GalNAca-Sp14                                                              | 26  | 0 | 6 | 1 | 0 | 0.6479643 |
| 280 | Neu5Gca2-3Galb1-4GlcNAcb-Sp0                                                                      | 125 | 0 | 4 | 0 | 0 | 0.6443129 |
| 314 | Neu5Aca2-3Galb1-3(Neu5Aca2-3Galb1-4GlcNAcb1-6)GalNAca-Sp14                                        | 221 | 0 | 2 | 0 | 0 | 0.6407619 |
| 406 | Gala1-3(Fuca1-2)Galb1-4(Fuca1-3)Glc-Sp21                                                          | 37  | 0 | 6 | 1 | 0 | 0.6475509 |
| 149 | Galb1-4(Fuca1-3)GlcNAcb-Sp8                                                                       | 154 | 0 | 3 | 0 | 0 | 0.6432565 |
| 344 | Neu5Aca2-6Galb1-4GlcNAcb1-2Mana1-6Manb1-4GlcNAcb1-4GlcNAc-Sp12                                    | 17  | 0 | 6 | 1 | 0 | 0.6483023 |
| 187 | GlcNAcb1-4GlcNAcb1-4GlcNAcb-Sp8                                                                   | 36  | 0 | 5 | 1 | 0 | 0.647626  |
| 201 | GlcAb1-6Galb-Sp8                                                                                  | 17  | 0 | 6 | 1 | 0 | 0.6483023 |
| 306 | GlcNAcb1-3Man-Sp10                                                                                | 99  | 0 | 4 | 0 | 0 | 0.645293  |
| 237 | Neu5Aca2-3Galb1-3(Fuca1-4)GlcNAcb1-3Galb1-4(Fuca1-3)GlcNAcb-Sp0                                   | 99  | 0 | 4 | 0 | 0 | 0.645293  |
| 213 | Mana1-6(Mana1-3)Mana1-6(Mana1-3)Manb1-4GlcNAcb1-4GlcNAcb-Sp12                                     | 116 | 0 | 4 | 0 | 0 | 0.6446523 |
| 32  | [3OSO3]Galb1-4(Fuca1-3)GlcNAcb-Sp8                                                                | 46  | 0 | 5 | 1 | 0 | 0.6472501 |
| 438 | Galb1-6Galb-Sp10                                                                                  | 69  | 0 | 5 | 1 | 0 | 0.6463849 |
| 328 | Neu5Aca2-3Galb1-3(Fuca1-4)GlcNAcb1-3Galb1-3(Fuca1-4)GlcNAcb-Sp0                                   | 83  | 0 | 4 | 0 | 0 | 0.6458956 |
| 16  | GlcNAcb-Sp0                                                                                       | 49  | 0 | 5 | 1 | 0 | 0.6471373 |
| 210 | Mana1-3(Mana1-6)Mana-Sp9                                                                          | 42  | 0 | 5 | 1 | 0 | 0.6474005 |
| 103 | Gala1-3(Fuca1-2)Galb1-4(Fuca1-3)GlcNAcb-Sp8                                                       | 38  | 0 | 5 | 1 | 0 | 0.6475509 |
| 253 | Neu5Aca2-3Galb1-4(Fuca1-3)GlcNAcb1-3Galb-Sp8                                                      | 14  | 0 | 5 | 1 | 0 | 0.6484526 |
| 490 | [6OSO3](Fuca1-2)Galb1-3GlcNAcb-Sp0                                                                | 9   | 0 | 5 | 1 | 0 | 0.6486403 |
| 208 | Mana1-2Mana1-6(Mana1-3)Mana1-6(Mana1-2Mana1-2Mana1-3)Manb1-4GlcNAcb1-4GlcNAcb-Sp12                | 49  | 0 | 4 | 1 | 0 | 0.6471749 |

|     |                                                                                                                |     |   |    |   |   |           |
|-----|----------------------------------------------------------------------------------------------------------------|-----|---|----|---|---|-----------|
| 188 | GlcNAcb1-6(Galb1-3)GalNAca-Sp8                                                                                 | 9   | 0 | 5  | 1 | 0 | 0.6486403 |
| 382 | Fuca1-2Galb1-3(Fuca1-4)GlcNAcb1-3(Galb1-4(Fuca1-3)GlcNAcb1-6)Galb1-4Glc-Sp21                                   | 86  | 0 | 4  | 0 | 0 | 0.6457826 |
| 407 | Neu5Aca2-6Galb1-3GlcNAcb1-3(Galb1-4GlcNAcb1-6)Galb1-4Glc-Sp21                                                  | 200 | 0 | 1  | 0 | 0 | 0.6415941 |
| 177 | GlcNAcb1-3Galb-Sp8                                                                                             | 114 | 0 | 3  | 0 | 0 | 0.6447654 |
| 249 | Neu5Aca2-3Galb1-4(Fuca1-3)[6OSO3]GlcNAcb-Sp8                                                                   | 111 | 0 | 3  | 0 | 0 | 0.6448785 |
| 156 | Galb1-4GlcNAcb1-3GalNAca-Sp8                                                                                   | 67  | 0 | 4  | 0 | 0 | 0.6464978 |
| 22  | [3OSO3][6OSO3]Galb1-4GlcNAcb-Sp0                                                                               | 5   | 0 | 5  | 1 | 0 | 0.6487905 |
| 301 | Galb1-4GlcNAca1-6Galb1-4GlcNAcb-Sp0                                                                            | 87  | 0 | 3  | 0 | 0 | 0.6457826 |
| 491 | Gala1-3(Fuca1-2)Galb1-4GlcNAcb1-6GalNAca-Sp14                                                                  | 19  | 0 | 4  | 0 | 0 | 0.6483023 |
| 198 | GlcAa-Sp8                                                                                                      | 38  | 0 | 4  | 0 | 0 | 0.6475885 |
| 252 | Neu5Aca2-3Galb1-4(Fuca1-3)GlcNAcb-Sp8                                                                          | 25  | 0 | 4  | 0 | 0 | 0.648077  |
| 165 | Galb1-3(Galb1-4GlcNAcb1-6)GalNAc-Sp14                                                                          | 98  | 0 | 3  | 0 | 0 | 0.6453683 |
| 419 | Fuca1-2Galb1-3GlcNAcb1-3GalNAc-Sp14                                                                            | 80  | 0 | 3  | 0 | 0 | 0.6460462 |
| 134 | Galb1-3(Neu5Acb2-6)GalNAca-Sp8                                                                                 | 16  | 0 | 4  | 0 | 0 | 0.648415  |
| 43  | [6OSO3]Galb1-4GlcNAcb-Sp8                                                                                      | 32  | 0 | 4  | 0 | 0 | 0.6478139 |
| 45  | Neu5Aca2-3[6OSO3]Galb1-4GlcNAcb-Sp8                                                                            | 5   | 0 | 4  | 0 | 0 | 0.648828  |
| 500 | GlcNAcb1-2(GlcNAcb1-4)Mana1-3(GlcNAcb1-4)[GlcNAcb1-2(GlcNAcb1-6)Mana1-6]Manb1-4GlcNAcb1-4(Fuca1-6)GlcNAc-Sp21  | 4   | 0 | 4  | 0 | 0 | 0.6488656 |
| 236 | Neu5Aca2-3Galb1-3(Fuca1-4)GlcNAcb-Sp8                                                                          | 94  | 0 | 2  | 0 | 0 | 0.6455566 |
| 227 | Neu5Aca2-3(6-O-Su)Galb1-4(Fuca1-3)GlcNAcb-Sp8                                                                  | 44  | 0 | 3  | 0 | 0 | 0.6474005 |
| 119 | Gala1-4Galb1-4GlcNAcb-Sp8                                                                                      | 149 | 0 | 1  | 0 | 0 | 0.6435207 |
| 57  | Fuca1-2Galb1-3GalNAcb1-3Gala-Sp9                                                                               | 72  | 0 | 3  | 0 | 0 | 0.6463473 |
| 63  | Fuca1-2Galb1-3GalNAcb1-4(Neu5Aca2-3)Galb1-4Glc-Sp9                                                             | 42  | 0 | 3  | 0 | 0 | 0.6474757 |
| 109 | Gala1-3GalNAca-Sp8                                                                                             | 27  | 0 | 3  | 0 | 0 | 0.6480394 |
| 6   | Fuca-Sp8                                                                                                       | 27  | 0 | 3  | 0 | 0 | 0.6480394 |
| 196 | Glc1-6Glc-Sp8                                                                                                  | 60  | 0 | 2  | 0 | 0 | 0.6468364 |
| 418 | GlcNAcb1-2Mana1-3(GlcNAcb1-2(GlcNAcb1-6)Mana1-6)Manb1-4GlcNAcb1-4GlcNAcb-Sp19                                  | 51  | 0 | 2  | 0 | 0 | 0.6471749 |
| 53  | Galb1-4GlcNAcb1-2Mana1-3(Galb1-4GlcNAcb1-2Mana1-6)Manb1-4GlcNAcb1-4GlcNAcb-Sp12                                | 36  | 0 | 3  | 0 | 0 | 0.6477012 |
| 316 | Neu5Aca2-6Galb1-4GlcNAcb1-2Mana1-3(Galb1-4GlcNAcb1-2Mana1-6)Manb1-4GlcNAcb1-4GlcNAcb-Sp12                      | 125 | 0 | 1  | 0 | 0 | 0.6444261 |
| 427 | Galb1-4GlcNAcb1-3Galb1-4(Fuca1-3GlcNAcb1-6)Galb1-4Glc-Sp21                                                     | 31  | 0 | 3  | 0 | 0 | 0.6478891 |
| 385 | GlcNAcb1-2(GlcNAcb1-4)Mana1-3(GlcNAcb1-2Mana1-6)Manb1-4GlcNAcb1-4GlcNAc-Sp21                                   | 21  | 0 | 3  | 0 | 0 | 0.6482648 |
| 266 | Neu5Aca2-6Galb1-4GlcNAcb-Sp8                                                                                   | 45  | 0 | 2  | 0 | 0 | 0.6474005 |
| 46  | [6OSO3]GlcNAcb-Sp8                                                                                             | 21  | 0 | 3  | 0 | 0 | 0.6482648 |
| 408 | Galb1-3GalNAcb1-4(Neu5Aca2-8Neu5Aca2-3)Galb1-4Glc-Sp0                                                          | 148 | 0 | 0  | 0 | 0 | 0.6435962 |
| 504 | [4OSO3][6OSO3]GalNAcb1-4GlcNAc-Sp8                                                                             | 74  | 0 | 1  | 0 | 0 | 0.6463473 |
| 137 | Galb1-3GalNAca-Sp14                                                                                            | 52  | 0 | 2  | 0 | 0 | 0.6471373 |
| 74  | Fuca1-2Galb1-4GlcNAcb-Sp0                                                                                      | 61  | 0 | 2  | 0 | 0 | 0.6467988 |
| 275 | Neu5Acb2-6GalNAca-Sp8                                                                                          | 51  | 0 | 2  | 0 | 0 | 0.6471749 |
| 434 | Galb1-4GlcNAcb1-2Mana1-3(GlcNAcb1-4)(Galb1-4GlcNAcb1-6)(Galb1-4GlcNAcb1-2)Mana1-6)Manb1-4GlcNAcb1-4GlcNAc-Sp21 | 132 | 0 | 0  | 0 | 0 | 0.6441998 |
| 232 | Neu5Aca2-3(Neu5Aca2-6)GalNAca-Sp8                                                                              | 28  | 0 | 2  | 0 | 0 | 0.6480394 |
| 279 | Neu5Gca2-3Galb1-4(Fuca1-3)GlcNAcb-Sp0                                                                          | 255 | 1 | -2 | 0 | 0 | 0.639626  |
| 364 | Neu5Aca2-6GlcNAcb1-4GlcNAcb1-4GlcNAc-Sp21                                                                      | 25  | 0 | 2  | 0 | 0 | 0.6481521 |
| 39  | [4OSO3]Galb1-4GlcNAcb-Sp8                                                                                      | 35  | 0 | 2  | 0 | 0 | 0.6477764 |
| 430 | GlcNAcb1-2Mana1-3(GlcNAcb1-4)(GlcNAcb1-6(GlcNAcb1-2)Mana1-6)Manb1-4GlcNAcb1-4GlcNAc-Sp21                       | 30  | 0 | 2  | 0 | 0 | 0.6479643 |
| 264 | Neu5Aca2-6Galb1-4[6OSO3]GlcNAcb-Sp8                                                                            | 72  | 0 | 1  | 0 | 0 | 0.6464226 |
| 309 | HOOC(CH3)CH-3-O-GlcNAcb1-4GlcNAcb-Sp10                                                                         | 29  | 0 | 2  | 0 | 0 | 0.6480018 |
| 52  | GlcNAcb1-2Mana1-3(GlcNAcb1-2Mana1-6)Manb1-4GlcNAcb1-4GlcNAcb-Sp13                                              | 19  | 0 | 2  | 0 | 0 | 0.6483775 |
| 263 | Neu5Aca2-6GalNAcb1-4GlcNAcb-Sp0                                                                                | 19  | 0 | 2  | 0 | 0 | 0.6483775 |
| 184 | GlcNAcb1-4Galb1-4GlcNAcb-Sp8                                                                                   | 22  | 0 | 2  | 0 | 0 | 0.6482648 |
| 226 | Neu5Aca2-8Neu5Aca2-8Neu5Aca-Sp8                                                                                | 59  | 0 | 1  | 0 | 0 | 0.6469116 |

|     |                                                                                                                                  |       |    |       |      |      |           |
|-----|----------------------------------------------------------------------------------------------------------------------------------|-------|----|-------|------|------|-----------|
| 168 | Galb1-4Glc-b-Sp0                                                                                                                 | 49    | 0  | 1     | 0    | 0    | 0.6472877 |
| 295 | 6-H2PO3Glc-b-Sp10                                                                                                                | -7    | 0  | 2     | 0    | 0    | 0.6493535 |
| 191 | GlcNAcb1-6Galb1-4GlcNAcb-Sp8                                                                                                     | 73    | 0  | 0     | 0    | 0    | 0.6464226 |
| 148 | Galb1-4(Fuca1-3)GlcNAcb-Sp0                                                                                                      | 29    | 0  | 1     | 0    | 0    | 0.6480394 |
| 313 | Mana1-2Mana1-2Mana1-3(Mana1-2Mana1-6(Mana1-2Mana1-3)Mana1-6)Mana-Sp9                                                             | 31    | 0  | 1     | 0    | 0    | 0.6479643 |
| 234 | Neu5Aca2-3GalNAcb1-4GlcNAcb-Sp0                                                                                                  | 17    | 0  | 1     | 0    | 0    | 0.6484901 |
| 431 | GlcNAcb1-4(GlcNAcb1-2)Mana1-3(GlcNAcb1-4)(GlcNAcb1-6(GlcNAcb1-2)Mana1-6)Manb1-4GlcNAcb1-4GlcNAc-Sp21                             | 2     | 0  | 1     | 0    | 0    | 0.6490533 |
| 61  | Fuca1-2Galb1-3GalNAca-Sp14                                                                                                       | 83    | 0  | -1    | 0    | 0    | 0.6460838 |
| 304 | GlcAb1-3GlcNAcb-Sp8                                                                                                              | 39    | 0  | -1    | 0    | 0    | 0.6477388 |
| 206 | Mana1-2Mana1-3Mana-Sp9                                                                                                           | 16    | 0  | -1    | 0    | 0    | 0.6486028 |
| 440 | GalNAcb1-6GalNAcb-Sp8                                                                                                            | 3     | 0  | -1    | 0    | 0    | 0.6490908 |
| 428 | GlcNAcb1-2Mana1-3(GlcNAcb1-4)(GlcNAcb1-2Mana1-6)Manb1-4GlcNAcb1-4GlcNAc-Sp21                                                     | 37    | 0  | -2    | 0    | 0    | 0.6478515 |
| 319 | Neu5Aca2-8Neu5Aca2-8Neu5Acb-Sp8                                                                                                  | -6    | 0  | -4    | 0    | 0    | 0.649541  |
| 376 | (GalNAcb1-4GlcNAcb1-2Mana1-6)GalNAcb1-4GlcNAcb1-2Mana1-3Manb1-4GlcNAcb1-4GlcNAc-Sp12                                             | 34    | 0  | -36   | -4   | -2   | 0.6492409 |
| 352 | [6OSO3]GlcNAcb1-3Galb1-4GlcNAc-b-Sp0                                                                                             | -97   | 0  | -41   | -5   | -2   | 0.6543305 |
| 343 | Neu5Aca2-6Galb1-4GlcNAcb1-2Mana1-3(Mana1-6)Manb1-4GlcNAcb1-4GlcNAc-Sp12                                                          | -62   | 0  | -43   | -5   | -2   | 0.653098  |
| 351 | Galb1-3GlcNAcb1-2Mana1-3(Galb1-3GlcNAcb1-2Mana1-6)Manb1-4GlcNAcb1-4(Fuca1-6)GlcNAcb-Sp22                                         | 790   | 2  | -63   | -7   | -3   | 0.6215211 |
| 355 | KDNa2-3Galb1-4Glc-Sp0                                                                                                            | 2115  | 4  | -87   | -10  | -3   | 0.5705533 |
| 375 | Neu5Aca2-3Galb1-4(Fuca1-3)GlcNAcb1-3GalNAca-Sp14                                                                                 | 1574  | 3  | -94   | -11  | -4   | 0.5922183 |
| 452 | Neu5Aca2-8Neu5Aca2-3Galb1-3GalNAcb1-4(Neu5Aca2-8Neu5Aca2-3)Galb1-4Glc-b-Sp0                                                      | -70   | 0  | -86   | -10  | -5   | 0.6550021 |
| 443 | Fuca1-2Galb1-4GlcNAcb1-2(Fuca1-2Galb1-4GlcNAcb1-4)Mana1-3(Fuca1-2Galb1-4GlcNAcb1-2Mana1-6)Manb1-4GlcNAcb1-4GlcNAcb-Sp12          | -677  | -1 | -150  | -17  | -9   | 0.6796725 |
| 476 | Neu5Aca2-3Galb1-4GlcNAcb1-2Mana1-6(Neu5Aca2-3Galb1-4GlcNAcb1-2Mana1-3)Manb1-4GlcNAcb1-4(Fuca1-6)GlcNAcb-6AA                      | -54   | 0  | -295  | -34  | -17  | 0.6621717 |
| 475 | Neu5Aca2-6Galb1-4GlcNAcb1-2Mana1-6(Neu5Aca2-6Galb1-4GlcNAcb1-2Mana1-3)Manb1-4GlcNAcb1-4(Fuca1-6)GlcNAcb-6AA                      | -319  | -1 | -320  | -36  | -19  | 0.6728342 |
| 479 | Neu5Aca2-3Galb1-3GlcNAcb1-2Mana1-6(GlcNAcb1-4)(Neu5Aca2-3Galb1-3GlcNAcb1-2Mana1-3)Manb1-4GlcNAcb1-4GlcNAc-Sp21                   | -625  | -1 | -715  | -81  | -41  | 0.6980193 |
| 467 | Neu5Aca2-3Galb1-3GlcNAcb1-6(Neu5Aca2-3Galb1-4GlcNAcb1-2)Mana1-6(Neu5Aca2-3Galb1-3GlcNAcb1-2Mana1-3)Manb1-4GlcNAcb1-4GlcNAcb-Sp19 | -2187 | -4 | -1819 | -207 | -105 | 0.7848215 |

| Spacer Abbreviation | Chemical Structure                                                                              |
|---------------------|-------------------------------------------------------------------------------------------------|
| Sp0                 | CH <sub>2</sub> CH <sub>2</sub> NH <sub>2</sub>                                                 |
| Sp8                 | CH <sub>2</sub> CH <sub>2</sub> CH <sub>2</sub> NH <sub>2</sub>                                 |
| Sp9                 | CH <sub>2</sub> CH <sub>2</sub> CH <sub>2</sub> CH <sub>2</sub> CH <sub>2</sub> NH <sub>2</sub> |
| Sp10                | NHCOCH <sub>2</sub> NH                                                                          |
| Sp11                | OCH <sub>2</sub> C <sub>6</sub> H <sub>4</sub> -p-NHCOCH <sub>2</sub> NH                        |
| Sp12                | Asparagine                                                                                      |
| Sp13                | Glycine                                                                                         |
| Sp14                | Threonine                                                                                       |
| Sp15                | Serine                                                                                          |
| Sp16                | PNP (OC <sub>6</sub> H <sub>4</sub> NH <sub>2</sub> )                                           |
| Sp17                | OCH <sub>2</sub> C <sub>6</sub> H <sub>4</sub> NH <sub>2</sub>                                  |
| Sp18                | O(CH <sub>2</sub> ) <sub>3</sub> NHCO(CH <sub>2</sub> ) <sub>3</sub> NH <sub>2</sub>            |
| Sp19                | EN or NK                                                                                        |
| Sp20                | GENR                                                                                            |
| Sp21                | N(CH <sub>3</sub> )-O-(CH <sub>2</sub> ) <sub>2</sub> -NH <sub>2</sub>                          |
| Sp22                | NST                                                                                             |
| MDPLys              | Mur-L-Ala-D-iGlnb-(CH <sub>2</sub> ) <sub>4</sub> NH <sub>2</sub>                               |
